# Supplementary material for: Socioeconomic gradient in the developmental health of Canadian children with disabilities at school entry: a cross-sectional study
Source: PubMed Central journal article supplement — BMJ Open. 2020 Apr 28;10(4):e032396. doi: 10.1136/bmjopen-2019-032396 (PMC7213855; doi:10.1136/bmjopen-2019-032396), 2020-04-28
Supplement: bmjopen-2019-032396.draft_revisions.pdf [file bmjopen-2019-032396.draft_revisions.pdf]

# BMJ Open

BMJ Open is committed to open peer review. As part of this commitment we make the peer review history of every article we publish publicly available.

When an article is published we post the peer reviewers' comments and the authors' responses online. We also post the versions of the paper that were used during peer review. These are the versions that the peer review comments apply to.

The versions of the paper that follow are the versions that were submitted during the peer review process. They are not the versions of record or the final published versions. They should not be cited or distributed as the published version of this manuscript.

BMJ Open is an open access journal and the full, final, typeset and author-corrected version of record of the manuscript is available on our site with no access controls, subscription charges or pay-per-view fees (<http://bmjopen.bmj.com>).

If you have any questions on BMJ Open's open peer review process please email [info.bmjopen@bmj.com](mailto:info.bmjopen@bmj.com)

# BMJ Open

## The socioeconomic gradient in the developmental health of children with disabilities at school-entry: a cross-sectional study

|                               |                                                                                                                                                                                                                                                                                                                                                                                                                                                                                                                                                                                                                                                                                        |
|-------------------------------|----------------------------------------------------------------------------------------------------------------------------------------------------------------------------------------------------------------------------------------------------------------------------------------------------------------------------------------------------------------------------------------------------------------------------------------------------------------------------------------------------------------------------------------------------------------------------------------------------------------------------------------------------------------------------------------|
| Journal:                      | <i>BMJ Open</i>                                                                                                                                                                                                                                                                                                                                                                                                                                                                                                                                                                                                                                                                        |
| Manuscript ID                 | bmjopen-2019-032396                                                                                                                                                                                                                                                                                                                                                                                                                                                                                                                                                                                                                                                                    |
| Article Type:                 | Original research                                                                                                                                                                                                                                                                                                                                                                                                                                                                                                                                                                                                                                                                      |
| Date Submitted by the Author: | 19-Jun-2019                                                                                                                                                                                                                                                                                                                                                                                                                                                                                                                                                                                                                                                                            |
| Complete List of Authors:     | Zeraatkar, Dena; McMaster University, Health Research Methods, Evidence, and Impact<br>Duku, Eric; McMaster University, Offord Centre for Child Studies<br>Bennett, Teresa ; McMaster University, Offord Centre for Child Studies<br>Guhn, Martin; University of British Columbia, Human Early Learning Partnership, School of Population and Public Health<br>Forer, Barry; University of British Columbia, Human Early Learning Partnership, School of Population and Public Health<br>Brownell, Marni; University of Manitoba, Manitoba Centre for Health Policy, Department of Community Health Sciences<br>Janus, Magdalena; McMaster University, Offord Centre for Child Studies |
| Keywords:                     | Community child health < PAEDIATRICS, SOCIAL MEDICINE, PUBLIC HEALTH                                                                                                                                                                                                                                                                                                                                                                                                                                                                                                                                                                                                                   |
|                               |                                                                                                                                                                                                                                                                                                                                                                                                                                                                                                                                                                                                                                                                                        |

SCHOLARONE™  
Manuscripts

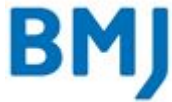

I, the Submitting Author has the right to grant and does grant on behalf of all authors of the Work (as defined in the below author licence), an exclusive licence and/or a non-exclusive licence for contributions from authors who are: i) UK Crown employees; ii) where BMJ has agreed a CC-BY licence shall apply, and/or iii) in accordance with the terms applicable for US Federal Government officers or employees acting as part of their official duties; on a worldwide, perpetual, irrevocable, royalty-free basis to BMJ Publishing Group Ltd ("BMJ") its licensees and where the relevant Journal is co-owned by BMJ to the co-owners of the Journal, to publish the Work in this journal and any other BMJ products and to exploit all rights, as set out in our [licence](#).

The Submitting Author accepts and understands that any supply made under these terms is made by BMJ to the Submitting Author unless you are acting as an employee on behalf of your employer or a postgraduate student of an affiliated institution which is paying any applicable article publishing charge ("APC") for Open Access articles. Where the Submitting Author wishes to make the Work available on an Open Access basis (and intends to pay the relevant APC), the terms of reuse of such Open Access shall be governed by a Creative Commons licence – details of these licences and which [Creative Commons](#) licence will apply to this Work are set out in our licence referred to above.

Other than as permitted in any relevant BMJ Author's Self Archiving Policies, I confirm this Work has not been accepted for publication elsewhere, is not being considered for publication elsewhere and does not duplicate material already published. I confirm all authors consent to publication of this Work and authorise the granting of this licence.

1  
2  
3 **The socioeconomic gradient in the developmental health of children with disabilities at school-entry:**  
4 **a cross-sectional study**  
5

6 Dena Zeraatkar, *PhD student* Department of Health Research Methods, Evidence, and Impact, McMaster  
7 University  
8

9 Eric Duku, *Assistant professor* Offord Centre for Child Studies, Department of Psychiatry and Behavioural  
10 Neurosciences  
11

12 Teresa Bennett, *Child Psychiatrist and assistant professor* Offord Centre for Child Studies, Department of  
13 Psychiatry and Behavioural Neurosciences  
14

15 Martin Guhn, *Assistant professor* Human Early Learning Partnership, School of Population and Public  
16 Health, University of British Columbia, Vancouver, British Columbia, Canada  
17

18 Barry Forer, PhD, *Research methodologist* Human Early Learning Partnership, School of Population and  
19 Public Health, University of British Columbia, Vancouver, British Columbia, Canada  
20

21 Marni Brownell, *Professor* Manitoba Centre for Health Policy, Department of Community Health  
22 Sciences, University of Manitoba, Winnipeg, Manitoba, Canada  
23

24 Magdalena Janus, *Professor* Offord Centre for Child Studies, Department of Psychiatry and Behavioural  
25 Neurosciences  
26

27  
28  
29  
30 Corresponding author:

31 Dr. Magdalena Janus

32 Offord Centre for Child Studies, Department of Psychiatry and Behavioural Neurosciences, McMaster  
33 University

34 1280 Main Street West

35 MIP 201A,

36 Hamilton, ON L8S 4K1, Canada

37 Tel: 905-574-6665 ext. 21418

38 E-mail: janusm@mcmaster.ca  
39  
40  
41  
42  
43

44 Word count: 2,889  
45  
46  
47

48 Keywords: developmental health, neighborhood SES, Early Development Instrument, cross-sectional  
49 study  
50  
51  
52  
53  
54  
55  
56  
57  
58  
59  
60

## Abstract

**Objective:** To examine the relationship between developmental health and neighborhood SES in kindergarten children with disabilities.

**Design:** Cross-sectional study using population-level database of children's developmental health at school entry (2002 – 2014).

**Setting:** 12 of 13 Canadian provinces/territories.

**Measures:** Taxfiler and Census data from 2005 and 2006, respectively, were aggregated according to custom-created neighborhood boundaries and used to create an index of neighborhood-level SES.

Developmental health outcomes were measured using the Early Development Instrument (EDI) that evaluates developmental health across five domains and is completed by teachers in the second-half of the kindergarten year for every child in their class based on their observations of the child during the first half of the year.

**Analysis:** Hierarchical generalized linear models were used to test the association between neighborhood-level SES and developmental health.

**Results:** All EDI domains were positively correlated with the neighborhood-level SES index. The strongest association was observed for the language & cognitive development domain ( $\beta$  (SE): 0.29 (0.02)) and the weakest association was observed for the emotional maturity domain ( $\beta$  (SE): 0.12 (0.01)).

**Conclusions:** The magnitude of differences observed in EDI scores across neighborhoods at the 5<sup>th</sup> and 95<sup>th</sup> percentiles are similar to the effects of more established predictors of development, such as sex. The association of SES with developmental outcomes in this population may present a potential opportunity for policy interventions to improve immediate and longer-term outcomes.

### Strengths and limitations of this study

- Our investigation uses a large, representative population-level database, that allowed us to focus on children with disabilities that make up only a small proportion of the population, while also maximizing external validity and statistical power and minimizing potential selection bias.
- We used data from the EDI, a valid and reliable measure of children's developmental health.
- We focused on early childhood, a time that has been well documented to critically impact children's long-term academic and social trajectory.
- We applied a non-categorical approach to childhood disabilities that reflects current thinking in the field of child development.
- The study's limitation is the exclusive use of neighborhood-level socioeconomic status indicators, without the ability to control for family-level ones.

## Introduction

To date, associations between a number of health outcomes and a combination of economic, human, and social characteristics, commonly conceptualized as socioeconomic gradients, have been reported, including end-stage renal disease, breast cancer, obesity, and cardiometabolic health.<sup>1-6</sup> These studies have mostly focused on chronic conditions in adulthood, with studies on the socioeconomic determinants of child health emerging only more recently.<sup>7-11</sup>

A socioeconomic gradient in typically developing children's developmental health has been reported in a number of high-, middle-, and low-income countries,<sup>12-14</sup> including Canada.<sup>8 15-17</sup> Additionally, the prevalence of childhood disabilities has been consistently shown to be negatively associated with SES.<sup>18</sup> Stabile & Currie (2003) used data from the Canadian National Longitudinal Survey of Children and Youth (NLSCY) for children between 0 and 11 years of age to illustrate an inverse relationship between the prevalence of chronic childhood disabilities and SES.<sup>19</sup> Msall and colleagues (2007) reported a more than three-fold difference in disability rates between children living in distressed vs. advantaged neighborhoods in Rhode Island.<sup>20</sup> However, little is known about the relationship between SES and developmental outcomes in children with special needs. Existing evidence most often addresses specific diagnoses during middle childhood, is not representative of all disabilities experienced by children during early childhood, and does not consider the impact of SES outside of the immediate family environment (i.e., neighborhood SES) which has been shown to be a significant influence on developmental outcomes in typically developing children.<sup>8 21 22,23</sup> Understanding determinants of developmental health in early childhood can help in identifying groups of children with disabilities that are likely to be most at risk for worse academic and social outcomes later in life. Such identification is useful for policy planning and the provision of health and education services. The objective of this study is to determine if there is a socioeconomic gradient in the developmental health of children with disabilities at school entry. This work extends existing research in that it focuses on

1  
2  
3 early childhood, a time at which experiences set the trajectory for future academic and social outcomes,  
4  
5 takes a diagnosis-free, non-categorical approach to childhood disability, and uses population-level data.  
6

## 7 8 **Methods**

9  
10 The project was approved by the Hamilton Integrated Research Ethics Board (no. 2403).  
11

### 12 ***Patient and Public Involvement***

13  
14 Patients/the public were not involved in the design or conduct of this study.  
15

### 16 ***Data Source and Measurement***

17  
18 Data for this study come from a Pan-Canadian database on early childhood development.<sup>8,24</sup> The  
19  
20 database includes cross-sectional data from all Canadian provincial implementations between 2004 and  
21  
22 2014 of the Early Development Instrument (EDI), a population-level instrument developed by Janus and  
23  
24 Offord (2007). The EDI is used to evaluate children's developmental health outcomes during the  
25  
26 kindergarten year across five core domains: physical health & wellbeing, social competence, emotional  
27  
28 maturity, language & cognitive development, and communication skills & general knowledge.<sup>25</sup> The EDI  
29  
30 is completed by teachers in the second half of the kindergarten year (the year before Grade 1) - usually  
31  
32 between February and March - based on their observations of each child. It is comprised of 103 core  
33  
34 items, and domain scores range from 0 to 10, with higher scores indicating better developmental health.  
35  
36 The EDI has been validated extensively for both typically-developing children<sup>25-34</sup> and those with  
37  
38 disabilities.<sup>35</sup>  
39  
40  
41  
42

43 The database also includes data on children's age, sex, and whether they have a "special needs"  
44  
45 designation.<sup>24</sup> The "special needs" designation is the operational indicator of childhood disability in our  
46  
47 study. Definitions of "special needs" are set by each province/territory,<sup>36,37</sup> but they are similar and  
48  
49 generally include children with identified health problems, with or without formal medical diagnoses,  
50  
51 that impede their ability to learn in a regular classroom. Children encompassed by this definition have a  
52  
53 broad range of impairments, varying widely in both type (e.g., physical or mental) and severity (e.g., mild  
54  
55  
56  
57  
58  
59  
60



1  
2  
3 speech impairment to non-verbal). The EDI database has been linked to Canadian Census and Taxfiler  
4 data from 2006 and 2005, respectively, using custom-created neighborhood boundaries. Meaningful  
5 boundaries were delineated using information on existing social structures and administrative and  
6 geographic divisions.<sup>38</sup> Census and Taxfiler variables were used to create the Canadian Neighbourhoods  
7 and Early Child Development (CanNECD) SES index, which includes indicators of education,  
8 language/immigration, marital status, wealth, income, dues, social capital, poverty, residential stability,  
9 and income inequality (Table S1).<sup>39</sup>

### 19 **Analysis**

20  
21 All data analyses were conducted in SAS<sup>TM</sup> software using the GLIMMIX procedure.<sup>40</sup> Given that EDI  
22 domain scores are left-skewed and restricted in range, and that children are clustered within  
23 neighborhoods and schools, EDI data were transformed from left- to right-skewed by subtraction from  
24 11, and analyzed using hierarchical generalized linear modeling (HGLM) with the identity link and  
25 gamma distribution. The fit of other distributions and link functions was also assessed but found to be  
26 generally inferior. Although children are clustered within two levels (neighborhoods and schools), only  
27 neighborhood of residence was included as a cluster variable due to data sparseness.<sup>41</sup> All models were  
28 performed using the Laplace approximation that allows estimation of likelihood statistics and has been  
29 shown to perform well with regard to accuracy and precision.<sup>42</sup>

30  
31 EDI domain scores were used as the dependent variable. For each EDI domain, the analysis was  
32 performed hierarchically in three steps. First, an intercept-only model was constructed. Second, a model  
33 with child-level characteristics that have been found to be significant predictors of children's  
34 developmental health (i.e., age, sex, and English/French language learner status (EFSL)) as fixed-effects  
35 was constructed.<sup>25,43</sup> Additionally, dummy variables for year of data collection, province, and the  
36 interaction between the two were included to control for variations in data collection procedures across  
37 time points and provinces. Finally, to evaluate the association between neighborhood-level SES and  
38  
39  
40  
41  
42  
43  
44  
45  
46  
47  
48  
49  
50  
51  
52  
53  
54  
55  
56  
57  
58  
59  
60

1  
2  
3 children's developmental health, the SES index was added in the third model. Random effects of each of  
4  
5 the individual predictors were added to the final model one-by-one and the overall improvement in the  
6  
7 fit of the model was tested.  
8

9  
10 To assess whether the inclusion of child-level characteristics (age, sex, EFSL status),  
11  
12 neighborhood-level SES, and random effects significantly improved model fit, partial likelihood ratio  
13  
14 tests were performed, and goodness-of-fit indices (i.e., Akaike Information Criterion (AIC), Bayesian  
15  
16 Information Criterion (BIC)) were compared between models. Multicollinearity was tested by examining  
17  
18 variance inflation factor (VIF) statistics for age, sex, EFSL status, and the SES index. VIF statistics for  
19  
20 province of residence, time of data collection, and their interaction are not included as these were  
21  
22 artificially inflated due to having been dummy coded and included as part of a regression model with  
23  
24 few predictors. Leverage statistics, along with plots of raw, Pearson, and studentized residuals were  
25  
26 used to identify outliers and influential observations. Observations with leverage statistics more than  
27  
28 twice the mean of all leverage values were investigated for data entry error. A sensitivity analysis was  
29  
30 conducted where observations with outlying studentized residuals, defined as studentized residuals with  
31  
32 absolute values greater than two, were excluded in the estimation of the models. Cases with missing  
33  
34 data were excluded from the analysis but were compared to those without missing data to ensure no  
35  
36 substantial differences in demographic characteristics.  
37  
38  
39  
40

## 41 **Results**

### 42 ***Population Characteristics***

43  
44 A total of 29,520 children with disabilities were identified in the database. Population characteristics are  
45  
46 presented in Table 1.  
47  
48  
49

50 These children resided in 2,016 neighborhoods. Neighborhood characteristics are presented in  
51  
52 Table 2. Forty (1.95%) neighborhoods in the database were excluded from the analysis due to not having  
53  
54  
55  
56  
57  
58  
59

1  
2  
3 any children with special needs (Table S2). These neighborhoods included fewer children overall, were  
4  
5 of higher SES, and did not proportionally represent Canadian provinces as the majority were in Quebec.  
6

7  
8 Characteristics of children missing any one of the five EDI domain scores are presented in Table  
9  
10 S3. Overall, only a small proportion of children (<2%) were missing data on any of the EDI domains and  
11  
12 these children did not differ in demographic characteristics from the analytic sample.  
13

### 14 **Model Results**

15  
16 Regression coefficients, their levels of significance, and goodness-of-fit indices from the final model for  
17  
18 each of the EDI domains are presented in Table 3. Additional details on each step of model development  
19  
20 along with goodness-of-fit indices are presented in supplementary tables 4 through 8. The gamma  
21  
22 distribution with an identity link produced the best fit for most domains, as assessed by AIC and BIC  
23  
24 statistics (Table S9). Random effects of predictors did not significantly improve fit and so they were not  
25  
26 included in the final model.  
27  
28

29  
30 The results of the regression analysis indicate that both child-level characteristics and SES are  
31  
32 significant predictors of children's EDI domain scores, as indicated by decreasing deviance, AIC, and BIC  
33  
34 statistics across models, as well as significant likelihood ratio tests (supplementary tables 4 through 8).  
35

36  
37 Year of data collection, province/territory, and the interaction between them were statistically  
38  
39 significant for all domains. Age was statistically significant for all domains except physical health &  
40  
41 wellbeing. Age was positively associated with language and cognitive development scores, and  
42  
43 negatively with emotional maturity, social competence, and communication skills & general knowledge,  
44  
45 with the largest effect sizes seen in the latter two domains and the smallest in physical health &  
46  
47 wellbeing. Sex was statistically significant for all EDI domains and, on average, girls had higher scores  
48  
49 than boys on all domains of the EDI, with the smallest sex differences in language & cognitive  
50  
51 development, and largest in emotional maturity. English/French language learners had higher scores  
52  
53 than non-learners in emotional maturity (smallest absolute effect) but lower scores in language &  
54  
55  
56  
57  
58  
59  
60

1  
2  
3 cognitive development and communication skills & general knowledge (largest absolute effect). The SES  
4 index was a statistically significant predictor of all EDI domains and was consistently positively  
5 associated with all domain scores. The smallest association was observed for the emotional maturity  
6 scores, and the largest for and language & cognitive development.  
7  
8  
9  
10

### 11 ***Model Diagnostics and Sensitivity Analyses***

12 Excluding dummy coded categorical variables, all VIF statistics were below the cut-off of 10 and ranged  
13 from 1.05 and 1.10. Studentized residuals were used to identify influential and outlying observations.  
14  
15 The results of the sensitivity analysis excluding cases with absolute studentized residual values greater  
16 than 2 are presented in Table S10 through 14. The results from this sensitivity analysis were very similar  
17 to the results of the primary analysis.  
18  
19  
20  
21  
22  
23  
24  
25

### 26 **Discussion**

27 The objective of this investigation was to examine the association between neighborhood-level SES and  
28 developmental health in children with disabilities (operationally defined as “special needs” designation)  
29 at school entry, in order to determine the importance of contextual factors in predicting outcomes in  
30 this population. The results indicate that neighborhood-level SES is a consistent and significant predictor  
31 of developmental outcomes in this population. An average difference of 0.12 to 0.29 points in EDI  
32 domain scores was observed per standard deviation difference in SES, with higher EDI domain scores  
33 being observed in higher SES neighborhoods. Neighborhood-level SES had the strongest association with  
34 the language & cognitive development domain and the weakest with emotional maturity domain.  
35  
36  
37  
38  
39  
40  
41  
42  
43  
44  
45

### 46 ***Consistency with previous studies***

47 Comparing the magnitude of association between SES and developmental health with previous  
48 literature is difficult due to differences in the operationalization of these constructs and differences in  
49 analytic methods. Previous studies, mostly conducted with typically developing children,<sup>12</sup> have either  
50 explored the direct association between SES and developmental health<sup>8 15-17 44</sup> or investigated mediators  
51  
52  
53  
54  
55  
56  
57  
58  
59  
60

1  
2  
3 of this relationship, including parent/child activities, access to a computer, participation in organized  
4 classes and activities, and maternal mental health.<sup>45-47</sup> Most of these studies measured SES at the  
5 individual family level and all demonstrated a positive association between social and economic  
6 variables and developmental health.  
7  
8  
9  
10

11  
12 Among the studies done in typically developing populations, four use EDI outcomes, with three  
13 including neighborhood-level measures of SES.<sup>8 15 17</sup> All studies demonstrated a positive association  
14 between SES and the EDI. The most recent study looked at neighborhood effects in typically developing  
15 children using four published neighborhood SES indices.<sup>8</sup> The strength of association between the  
16 indices and EDI domains varied, depending on the SES index used. Similar to our results, the strongest  
17 association was most often found for the language & cognitive development domain.  
18  
19  
20  
21  
22  
23  
24

25  
26 The few studies done in children with disabilities also report a positive association between SES  
27 and academic and social outcomes.<sup>21-23 48-50</sup> These studies are different from the present investigation in  
28 that they only focus on a few high-incidence diagnoses, such as learning disabilities during middle  
29 childhood and adolescence and do not measure SES at the neighborhood-level.  
30  
31  
32  
33

### 34 ***Strengths and limitations***

35  
36  
37 There are several strengths of this study. First, we used population-level data, which made focusing on  
38 children with disabilities that only make up a small proportion of the population possible, while also  
39 maximizing external validity and statistical power and minimizing potential selection bias. Second, we  
40 focused on early childhood, a time that critically impacts children's long-term academic and social  
41 trajectory.<sup>51</sup> Third, we applied a non-categorical approach to childhood disabilities which reflects current  
42 thinking in the field of child development and findings that diagnostic categories often do not fully  
43 reflect the actual abilities and needs of children.<sup>52-54</sup> Fourth, the EDI has undergone extensive reliability  
44 and validity testing, and has been found to be predictive of academic achievement and social  
45 functioning throughout early and middle childhood.<sup>25-34</sup> The psychometric performance of the EDI in  
46  
47  
48  
49  
50  
51  
52  
53  
54  
55  
56  
57  
58  
59  
60

1  
2  
3 children with special needs has also been found similar to its performance in typically developing  
4  
5 children.<sup>35</sup> Currently, the EDI is the only available indicator of developmental health that allows  
6  
7 examination of variability across Canada at a population-level. Finally, the analytic methods used in this  
8  
9 investigation appropriately take into account the skewed distribution and nesting of EDI data, which  
10  
11 prevents artificially deflated standard errors and hence inappropriate statistically significant findings.  
12  
13

14 This investigation is also subject to limitations. First, due to the cross-sectional design of this  
15  
16 study, causality cannot be established. There is evidence that developmental problems in children may  
17  
18 increase parental stress and impact the general socioeconomic wellbeing of families.<sup>55 56</sup> Additionally,  
19  
20 there is the possibility of self-selection where families with similar experiences may choose to reside  
21  
22 within similar neighborhoods. Regardless of causality, or lack thereof, the results of this study indicate  
23  
24 that services aimed at young children with disabilities that are particularly accessible in low SES  
25  
26 neighborhoods are likely to be most impactful.  
27  
28

29  
30 Second, we used a very broad definition of disability, which is based on the designation of the  
31  
32 child by the education system at kindergarten, and hence, children with disabilities who did not have  
33  
34 this designation by the education system were excluded. It is possible that a very small minority of  
35  
36 children who were not typically developing but did not have this designation were excluded.  
37  
38

39 Third, the SES index may not accurately reflect the socioeconomic condition of the  
40  
41 neighborhoods in which children were raised. The variables used to construct the SES index come from  
42  
43 2005 and 2006, whereas EDI data were collected between 2004 and 2014. It is possible that changes in  
44  
45 neighborhoods or relocation of families could render the SES index less reflective of the true early  
46  
47 environment for some groups of children, which may have led to underestimation of the association  
48  
49 between SES and developmental outcomes. However, empirical evidence indicates that it is unlikely for  
50  
51 neighborhood characteristics to drastically change over time or for families move to neighborhoods  
52  
53 which are greatly different from their previous ones.<sup>57</sup>  
54  
55  
56  
57  
58  
59  
60

1  
2  
3 Finally, we were unable to control for family-level SES in the models. Thus, it is not possible to  
4  
5 determine whether this association is driven by neighborhood or family characteristics. We were also  
6  
7 unable to control for specific diagnoses or severity of disabilities that have undoubted impact on child  
8  
9 development. Similar investigation should be extended for smaller subgroups of children who share  
10  
11 diagnoses or functional impairments.  
12  
13

### 14 ***Implications***

15  
16 Our findings indicate that the relationship between SES and developmental outcomes also holds for  
17  
18 children with disabilities.<sup>8 15-17 44 58</sup> This underscores the potential impact of the early environment of  
19  
20 children on their development. Although clinicians often focus on biological factors, such as family  
21  
22 history of disabilities and harmful exposures in utero, social influences have commonly been found to be  
23  
24 more predictive of long-term developmental and academic outcomes and may be more amenable to  
25  
26 change.<sup>44</sup> According to survey data, clinicians are receptive to screening for social determinants of  
27  
28 health outside of the purview of clinical care, suggesting that the findings of this investigation are likely  
29  
30 to be relevant and acceptable to those in the clinical community.<sup>59</sup>  
31  
32  
33

34  
35 Our findings show that the association between child development and socioeconomic status,  
36  
37 which is well-established for typically developing children, also exists for children with disabilities. This  
38  
39 highlights the urgency for improving the social and economic context in which children are raised, in  
40  
41 addition to targeted interventions delivered at the individual child level. Failure to do so will likely result  
42  
43 in further perpetuation of inequities in child development – more so as children with disabilities are  
44  
45 already among the most disadvantaged groups globally.<sup>18 60</sup> It remains to be seen whether large-scale  
46  
47 policy interventions can help in reducing disparities in this population similarly to other groups.<sup>61</sup>  
48  
49

50  
51 Additional investigations could further strengthen and contextualize these findings. Specifically,  
52  
53 establishing the consistency and relative strength of the relationship between SES and developmental  
54  
55 outcomes across subgroups of physical, behavioral, and learning disabilities, as well as subgroups based  
56  
57  
58  
59  
60

1  
2  
3 on severity of condition and time of diagnosis, would further untangle the relationship between SES,  
4 disabilities, and development, and would be helpful in identifying service provision strategies that are  
5 likely to be most successful in improving outcomes.  
6  
7  
8  
9

## 10 **Conclusion**

11  
12 The results from this investigation show neighborhood SES to be significantly associated with the  
13 developmental health of children with disabilities at school entry. These findings have implications for  
14 policy planning and provision of health and educational service and draw attention to the universality of  
15 importance of contextual factors for development of all children.  
16  
17  
18  
19  
20  
21

22 **Funding:** This work was supported by an operating grant from the Canadian Institutes of Health  
23 Research, grant number 142416. DZ was supported by a Canada Graduate Scholarships-Master's Award  
24 and is currently supported by a CIHR Doctoral Scholarship. TB is supported by a Hamilton Health  
25 Sciences Early Career Award. MJ is supported by the Ontario Chair in Early Childhood Development.  
26

27 **Competing interests:** None.  
28  
29

30 **Contributions:** DZ, ED, TB, MJ, MG, BF, and MB conceived the study. DZ analyzed and ED provided  
31 technical expertise. DZ wrote the first draft of the manuscript and all authors made significant  
32 contributions to the manuscript.  
33  
34

35 **Data sharing statement:** No additional data available.  
36  
37  
38  
39  
40  
41  
42  
43  
44  
45  
46  
47  
48  
49  
50  
51  
52  
53  
54  
55  
56  
57  
58  
59  
60



## References

1. Marmot MG, Rose G, Shipley M, et al. Employment grade and coronary heart disease in British civil servants. *J Epidemiol Community Health* 1978;32(4):244-49.
2. Marmot MG, Stansfeld S, Patel C, et al. Health inequalities among British civil servants: the Whitehall II study. *The Lancet* 1991;337(8754):1387-93.
3. Hill KE, Gleadle JM, Pulvirenti M, et al. The social determinants of health for people with type 1 diabetes that progress to end-stage renal disease. *Health Expect* 2015;18(6):2513-21.
4. Shariff-Marco S, Yang J, John EM, et al. Intersection of race/ethnicity and socioeconomic status in mortality after breast cancer. *J Community Health* 2015;40(6):1287-99.
5. Tomayko E, Flood T, Tandias A, et al. Linking electronic health records with community-level data to understand childhood obesity risk. *Pediatric obesity* 2015;10(6):436-41.
6. Puckrein GA, Egan BM, Howard G. Social and Medical Determinants of Cardiometabolic Health: The Big Picture. *Ethn Dis* 2015;25(4):521.
7. Keating DP, Hertzman C. Developmental health and the wealth of nations: Social, biological, and educational dynamics: Guilford Press 2000.
8. Webb S, Janus M, Duku E, et al. Neighbourhood socioeconomic status indices and early childhood development. *SSM Popul Health* 2017;3:48-56.
9. Frederick CB, Snellman K, Putnam RD. Increasing socioeconomic disparities in adolescent obesity. *Proc Natl Acad Sci* 2014;111(4):1338-42.
10. Cabieses B, Pickett KE, Wilkinson RG. The Impact of Socioeconomic Inequality on Children's Health and Well-being. *The Oxford Handbook of Economics and Human Biology*: Oxford University Press 2016:244.
11. Wang C, Guttmann A, To T, et al. Neighborhood income and health outcomes in infants: how do those with complex chronic conditions fare? *Arch Pediatr Adolesc Med* 2009;163(7):608-15.
12. Letourneau NL, Duffett-Leger L, Levac L, et al. Socioeconomic status and child development: A meta-analysis. *Emot Behav Disord* 2013;21(3):211-24.
13. Kershaw P, Forer B, Irwin LG, et al. Toward a social care program of research: A population-level study of neighborhood effects on child development. *Early Educ Dev* 2007;18(3):535-60.
14. Carpiano RM, Lloyd JE, Hertzman C. Concentrated affluence, concentrated disadvantage, and children's readiness for school: A population-based, multi-level investigation. *Soc Sci Med* 2009;69(3):420-32.
15. Oliver LN, Dunn JR, Kohen DE, et al. Do neighbourhoods influence the readiness to learn of kindergarten children in Vancouver? A multilevel analysis of neighbourhood effects. *Environ Plan A* 2007;39(4):848-68.
16. Guhn M, Gadermann AM, Hertzman C, et al. Children's development in kindergarten: A multilevel, population-based analysis of ESL and gender effects on socioeconomic gradients. *Child Indic Res* 2010;3(2):183-203.
17. Lapointe VR, Ford L, Zumbo BD. Examining the relationship between neighborhood environment and school readiness for kindergarten children. *Early Educ Dev* 2007;18(3):473-95.
18. Spencer NJ, Blackburn CM, Read JM. Disabling chronic conditions in childhood and socioeconomic disadvantage: a systematic review and meta-analyses of observational studies. *BMJ open* 2015;5(9):e007062.
19. Stabile M, Currie J. Socioeconomic Status and Child Health: Why Is the Relationship Stronger for Older Children? *Am Econ Rev* 2003;93(5):1813-23.
20. Msall ME, Avery RC, Msall ER, et al. Distressed neighborhoods and child disability rates: analyses of 157 000 school-age children. *Dev Med Child Neurol* 2007;49(11):814-17.

21. Turner S, Alborz A, Gayle V. Predictors of academic attainments of young people with Down's syndrome. *J Intellect Disabil Res* 2008;52(5):380-92.
22. Turner S, Sloper P, Knussen C, et al. Socio-economic factors: their relationship with child and family functioning for children with Down's syndrome. *J Appl Res Intellect Disabil* 1991;4(1):80-100.
23. Szumski G, Karwowski M. School achievement of children with intellectual disability: The role of socioeconomic status, placement, and parents' engagement. *Res Dev Disabil* 2012;33(5):1615-25.
24. Janus M, Brownell, M., Reid-Westoby, C., Bennet, T., Birken, C., Coplan, R., Duku, E., Ferro, M. A., Forer, B., Georgiades, S., Gorter, J. W., Guhn, M., Maguire, J., Manson, H., Pei, J., Santos, R. . Establishing a protocol for building a pan-Canadian population-based monitoring system for early childhood development for children with health disorders - Canadian Children's Health in Context Study (CCHICS). *BMJ Open* 2018 (in press)
25. Janus M, Offord DR. Development and psychometric properties of the Early Development Instrument (EDI): A measure of children's school readiness. *Can J Behav Sci* 2007;39(1):1.
26. Janus M, Hughes D, Duku E. Patterns of school readiness among selected subgroups of Canadian children: Children with special needs and children with diverse language backgrounds. *CCL* 2010
27. Andrich D, Styles I. Final Report on the Psychometric Analysis of the Early Development Instrument (EDI) Using the Rasch Model: A Technical Paper Commissioned for the Development of the Australian Early Development Instrument (AEDI): Citeseer 2004.
28. Forget-Dubois N, Lemelin J-P, Boivin M, et al. Predicting early school achievement with the EDI: A longitudinal population-based study. *Early Educ Dev* 2007;18(3):405-26.
29. Guhn M, Gadermann A, Zumbo BD. Does the EDI measure school readiness in the same way across different groups of children? *Early Educ Dev* 2007;18(3):453-72.
30. Guhn M, Goelman H. Bioecological theory, early child development and the validation of the population-level early development instrument. *Soc Indic Res* 2011;103(2):193-217.
31. Janus M, Brinkman SA, Duku EK. Validity and psychometric properties of the early development instrument in Canada, Australia, United States, and Jamaica. *Soc Indic Res* 2011;103(2):283-97.
32. Brinkman S, Gregory T, Harris J, et al. Associations between the early development instrument at age 5, and reading and numeracy skills at ages 8, 10 and 12: a prospective linked data study. *Child Indic Res* 2013;6(4):695-708.
33. Davies S, Janus M, Duku E, et al. Using the Early Development Instrument to examine cognitive and non-cognitive school readiness and elementary student achievement. *Early Child Res Q* 2016;35:63-75.
34. Forer B, Zumbo BD. Validation of multilevel constructs: Validation methods and empirical findings for the EDI. *Soc Indic Res* 2011;103(2):231.
35. Janus M, Zeraatkar D, Duku E, et al. Validation of the Early Development Instrument for children with special health needs. *Paediatr Child Health* 2018:1-7.
36. Janus M, Lefort J, Cameron R, et al. Starting kindergarten: Transition issues for children with special needs. *CJE* 2007:628-48.
37. Dworet D, Bennett S. A view from the north: Special education in Canada. *TEC* 2002;34(5):22.
38. Guhn M, Janus M, Enns J, et al. Examining the social determinants of children's developmental health: protocol for building a pan-Canadian population-based monitoring system for early childhood development. *BMJ open* 2016;6(4):e012020.
39. Forer B, Minh A, Enns J, et al. A Canadian Neighborhood Index for Socioeconomic Status Associated with Early Child Development. *SSM Popul Health* 2018 (in review)
40. SAS University Edition [program]. Cary, NC: SAS Institute, 2017.
41. Schunck R. Cluster Size and Aggregated Level 2 Variables in Multilevel Models. A Cautionary Note. *mda* 2016;10(1):97-108.

42. Kim Y, Choi Y-K, Emery S. Logistic regression with multiple random effects: a simulation study of estimation methods and statistical packages. *Am Stat* 2013;67(3):171-82.
43. Goldfeld S, O'Connor M, Sayers M, et al. Prevalence and correlates of special health care needs in a population cohort of Australian children at school entry. *J Dev Behav Pediatr* 2012;33(4):319-27.
44. Nelson BB, Dudovitz RN, Coker TR, et al. Predictors of poor school readiness in children without developmental delay at age 2. *Pediatrics* 2016:e20154477.
45. Hsu H-C, Wickrama KA. Linking family economic hardship to early childhood health: An investigation of mediating pathways. *Matern Child Health J* 2015;19(12):2636-45.
46. Larson K, Russ SA, Nelson BB, et al. Cognitive ability at kindergarten entry and socioeconomic status. *Pediatrics* 2015;135(2):e440-e48.
47. Shah R, Sobotka SA, Chen Y-F, et al. Positive parenting practices, health disparities, and developmental progress. *Pediatrics* 2015:peds. 2014-3390.
48. King G, McDougall J, DeWit D, et al. Pathways to children's academic performance and prosocial behaviour: Roles of physical health status, environmental, family, and child factors. *Int J Disabil Dev Educ* 2005;52(4):313-44.
49. Emerson E, Hatton C, MacLean J, William E. Contribution of socioeconomic position to health inequalities of British children and adolescents with intellectual disabilities. *Am J Ment Retard* 2007;112(2):140-50.
50. Hauser-Cram P, Durand TM, Warfield ME. Early feelings about school and later academic outcomes of children with special needs living in poverty. *Early Child Res Q* 2007;22(2):161-72.
51. Irwin LG, Siddiqi A, Hertzman C. Early child development: A powerful equalizer. *Final report to the WHO Commission on social determinants of health, Geneva 2007*
52. Stein R, Jessop DJ. A noncategorical approach to chronic childhood illness. *Public Health Rep* 1982;97(4):354.
53. McDowell M, O'Keeffe M. Public services for children with special needs: discrimination by diagnosis? *J Paediatr Child Health* 2012;48(1):2-5.
54. Rosenbaum P, Gorter J. The 'F-words' in childhood disability: I swear this is how we should think! *Child Care Health Dev* 2012;38(4):457-63.
55. Anderson L, Larson S, Lakin C, et al. Children with disabilities: social roles and family impacts in the NHIS-D. *DD data brief* 2002;4(1):1-12.
56. Hayes SA, Watson SL. The impact of parenting stress: A meta-analysis of studies comparing the experience of parenting stress in parents of children with and without autism spectrum disorder. *J Autism Dev Disord* 2013;43(3):629-42.
57. Kunz J, Page ME, Solon G. Are point-in-time measures of neighborhood characteristics useful proxies for children's long-run neighborhood environment? *Econ Lett* 2003;79(2):231-37.
58. Jutte DP, Brownell M, Roos NP, et al. Rethinking what is important: biologic versus social predictors of childhood health and educational outcomes. *Epidemiology* 2010;21(3):314-23.
59. Garg A, Butz AM, Dworkin PH, et al. Screening for basic social needs at a medical home for low-income children. *Clin Pediatr (Phila)* 2009;48(1):32-36.
60. Leitman R, Cooner E, Risher P. NOD/Harris Survey of Americans with Disabilities: Louis Harris and Associates 1994.
61. Kamerman SB, Neuman M, Waldfogel J, et al. Social policies, family types and child outcomes in selected OECD countries. *OECD* 2003

**Table 1: Population characteristics**

| <b>Sex</b>                         | <b>N (% of population of children with disabilities)</b> |
|------------------------------------|----------------------------------------------------------|
| Female                             | 8906 (30.2)                                              |
| Male                               | 20585 (69.7)                                             |
| Missing                            | 29 (0.1)                                                 |
| <b>Age</b>                         |                                                          |
| Mean (SD)                          | 5.79 (0.41)                                              |
| Missing                            | 114 (0.39)                                               |
| <b>EFSL Status</b>                 |                                                          |
| <b>N (%)</b>                       |                                                          |
| Yes                                | 3637 (12.3)                                              |
| No                                 | 25402 (86.0)                                             |
| Missing                            | 481 (1.6)                                                |
| <b>Province</b>                    |                                                          |
| <b>N (%)</b>                       |                                                          |
| Alberta                            | 2099 (7.1)                                               |
| British Columbia                   | 5044 (17.1)                                              |
| Manitoba                           | 2468 (8.4)                                               |
| New Brunswick                      | 327 (1.1)                                                |
| Newfoundland                       | 641 (2.2)                                                |
| Nova Scotia                        | 1083 (3.7)                                               |
| Northwest Territories              | 65 (0.2)                                                 |
| Ontario                            | 13198 (44.7)                                             |
| Prince Edward Island               | 29 (0.1)                                                 |
| Quebec                             | 3023 (10.2)                                              |
| Saskatchewan                       | 1440 (4.9)                                               |
| Yukon                              | 103 (0.3)                                                |
| <b>Year of data collection</b>     |                                                          |
| <b>N (%)</b>                       |                                                          |
| 2004                               | 474 (1.6)                                                |
| 2005                               | 2332 (7.9)                                               |
| 2006                               | 4304 (14.6)                                              |
| 2007                               | 1471 (5.0)                                               |
| 2008                               | 1762 (6.0)                                               |
| 2009                               | 4786 (16.2)                                              |
| 2010                               | 2658 (9.0)                                               |
| 2011                               | 3494 (11.8)                                              |
| 2012                               | 5140 (17.4)                                              |
| 2013                               | 2711 (9.2)                                               |
| 2014                               | 388 (1.3)                                                |
| <b>Mean (SD) EDI domain scores</b> |                                                          |
| PHWB                               | 7.02 (2.12)                                              |
| SC                                 | 5.71 (2.63)                                              |
| EM                                 | 6.13 (1.99)                                              |
| LCD                                | 6.18 (3.01)                                              |
| CSGK                               | 4.37 (3.27)                                              |

PHWB=Physical health & wellbeing; EM=Emotional maturity; LCD=Language & cognitive development; CSGK=communication skills & general knowledge

**Table 2: Neighborhood characteristics (N=2016)**

| <b>Province</b>                                                                | <b>Number of neighborhoods (%)</b> |
|--------------------------------------------------------------------------------|------------------------------------|
| Alberta                                                                        | 259 (12.8)                         |
| British Columbia                                                               | 298 (14.7)                         |
| Manitoba                                                                       | 75 (3.7)                           |
| New Brunswick                                                                  | 48 (2.4)                           |
| Newfoundland                                                                   | 41 (2.0)                           |
| Nova Scotia                                                                    | 57 (2.8)                           |
| Northwest Territories                                                          | 3 (0.1)                            |
| Ontario                                                                        | 795 (39.4)                         |
| Prince Edward Island                                                           | 6 (0.3)                            |
| Quebec                                                                         | 373 (18.5)                         |
| Saskatchewan                                                                   | 55 (2.7)                           |
| Yukon                                                                          | 6 (0.3)                            |
| <b>Median (IQR) number of children with disabilities in each neighbourhood</b> | 11 (6 – 19)                        |
| <b>Median (IQR) number of children in each neighborhood</b>                    | 128 (87 – 194)                     |

**Table 3: Final Hierarchical Generalized Linear Models (HGLMs) for the Early Development Instrument (EDI)**

| Variables          | Physical health & wellbeing (PHWB) | Social competence (SC)        | Emotional maturity (EM)       | Language & cognitive development (LCD) | Communication skills & general knowledge (CSGK) |
|--------------------|------------------------------------|-------------------------------|-------------------------------|----------------------------------------|-------------------------------------------------|
|                    | $\beta$ coefficient (95% CIs)      | $\beta$ coefficient (95% CIs) | $\beta$ coefficient (95% CIs) | $\beta$ coefficient (95% CIs)          | $\beta$ coefficient (95% CIs)                   |
| Age                | -0.04 (-0.01 to 0.03)              | -0.13 (-0.22 to -0.05)        | -0.08 (-0.14 to -0.02)        | 0.10 (0.01 to 0.18)                    | -0.13 (-0.24 to -0.02)                          |
| Sex (M=0; F=1)     | 0.14 (0.08 to 0.19)                | 0.76 (0.69 to 0.83)           | 0.81 (0.76 to 0.86)           | 0.13 (0.05 to 0.21)                    | 0.43 (0.33 to 0.53)                             |
| EFSL (no=0; yes=1) | 0.04 (-0.04 to 0.12)               | -0.10 (-0.20 to 0.01)         | 0.12 (0.05 to 0.20)           | -0.43 (-0.56 to -0.31)                 | -1.11 (-0.94 to -1.27)                          |
| SES z-score        | 0.17 (0.14 to 0.20)                | 0.17 (0.13 to 0.21)           | 0.12 (0.09 to 0.15)           | 0.29 (0.24 to 0.33)                    | 0.19 (0.14 to 0.24)                             |

95% CIs=95% confidence intervals; EFSL=English/French as a second language; SES=socioeconomic status

Note that coefficient presented in this table reflect the directionality of the association between variables and untransformed EDI scores.

**Table S1: Variables included in the Canadian Neighbourhoods and Early Child Development (CanNECD) socioeconomic status (SES) index**

|                              |                                                                                    |
|------------------------------|------------------------------------------------------------------------------------|
| <b>Education</b>             | % with no high school diploma                                                      |
| <b>Language/Immigration</b>  | % not speaking either official language at home                                    |
| <b>Marital Status</b>        | % separated or divorced                                                            |
| <b>Wealth</b>                | % with investment income, families with children under 6                           |
| <b>High Income</b>           | % with incomes $\geq$ twice than provincial median, families with children under 6 |
| <b>Dues</b>                  | % with union/association dues, families with children under 6                      |
| <b>Social Capital</b>        | % with charitable donations, families with children under 6                        |
| <b>Poverty</b>               | % with low income, lone parent families with children under 6                      |
| <b>Residential Stability</b> | % non-migrant movers in the past year                                              |
| <b>Income Inequality</b>     | Gini Coefficient, lone female families with children under 6                       |

**Table S2: Descriptive characteristics of neighborhoods excluded from analysis (n=40)**

| <b>Province</b>                                              | <b>Number of neighborhoods (%)</b> |
|--------------------------------------------------------------|------------------------------------|
| <b>Alberta</b>                                               | 8 (20)                             |
| <b>New Brunswick</b>                                         | 4 (10)                             |
| <b>Ontario</b>                                               | 5 (12.5)                           |
| <b>Quebec</b>                                                | 23 (57.5)                          |
| <b>Median (IQR) number of children in each neighbourhood</b> | 83 (56-141)                        |
| <b>Mean (SD) of standardized SES index</b>                   | 0.38 (0.88)                        |



**Table S3: Descriptive characteristics of population of children with missing Physical Health & Wellbeing (PHWB) scores (n=446)**

|                                    | PHWB         | SC          | EM          | LCD         | CSGK        |
|------------------------------------|--------------|-------------|-------------|-------------|-------------|
| <b>Sex</b>                         | <b>N (%)</b> |             |             |             |             |
| Female                             | 123 (27.6)   | 138 (30.5)  | 166 (27.7)  | 154 (28.4)  | 128 (30.4)  |
| Male                               | 318 (71.3)   | 311 (68.7)  | 429 (71.5)  | 384 (70.8)  | 289 (68.6)  |
| Missing                            | 5 (1.1)      | 4 (0.9)     | 5 (0.8)     | 4 (0.7)     | 4 (1.0)     |
| <b>Age</b>                         |              |             |             |             |             |
| Mean (SD)                          | 5.78 (0.40)  | 5.73 (0.4)  | 5.78 (0.4)  | 5.76 (0.4)  | 5.76 (0.41) |
| Missing                            | 7 (1.57)     | 6 (1.3)     | 8 (1.3)     | 6 (1.1)     | 7 (1.66)    |
| <b>EFSL Status</b>                 | <b>N (%)</b> |             |             |             |             |
| Yes                                | 61 (13.7)    | 61 (13.5)   | 76 (12.7)   | 77 (14.2)   | 59 (14.0)   |
| No                                 | 379 (85.0)   | 386 (85.2)  | 511 (85.2)  | 457 (84.3)  | 355 (84.3)  |
| Missing                            | 6 (1.3)      | 6 (1.3)     | 13 (2.2)    | 8 (1.5)     | 7 (1.7)     |
| <b>Province</b>                    | <b>N (%)</b> |             |             |             |             |
| Alberta                            | 82 (18.4)    | 84 (18.5)   | 92 (15.3)   | 91 (16.8)   | 85 (20.2)   |
| British Columbia                   | 9 (2.0)      | 17 (3.8)    | 41 (6.8)    | 45 (8.3)    | 7 (1.7)     |
| Manitoba                           | 122 (27.4)   | 117 (25.8)  | 131 (21.8)  | 121 (22.3)  | 113 (26.8)  |
| New Brunswick                      | 1 (0.2)      | 1 (0.2)     | 4 (0.7)     | 1 (0.2)     | 0 (0)       |
| Newfoundland                       | 3 (0.7)      | 6 (1.3)     | 6 (1.0)     | 3 (0.6)     | 5 (1.2)     |
| Nova Scotia                        | 15 (3.4)     | 14 (3.1)    | 20 (3.3)    | 21 (3.9)    | 15 (3.6)    |
| Northwest Territories              | 1 (0.2)      | 1 (0.2)     | 2 (0.3)     | 1 (0.2)     | 1 (0.2)     |
| Ontario                            | 193 (43.3)   | 192 (42.4)  | 241 (40.2)  | 222 (41.0)  | 173 (41.1)  |
| Prince Edward Island               | 0 (0)        | 0 (0)       | 0 (0)       | 1 (0.2)     | 0 (0)       |
| Quebec                             | 5 (1.1)      | 3 (0.7)     | 33 (5.5)    | 15 (2.8)    | 7 (1.7)     |
| Saskatchewan                       | 8 (1.8)      | 13 (2.9)    | 19 (3.2)    | 14 (2.6)    | 10 (2.4)    |
| Yukon                              | 0 (0)        | 0 (0)       | 0 (0)       | 0 (0)       | 0 (0)       |
| <b>Year of data collection</b>     | <b>N (%)</b> |             |             |             |             |
| 2004                               | 3 (0.7)      | 3 (0.7)     | 7 (1.2)     | 3 (0.6)     | 2 (0.5)     |
| 2005                               | 19 (4.3)     | 17 (3.8)    | 29 (4.8)    | 21 (3.9)    | 12 (2.9)    |
| 2006                               | 46 (10.3)    | 44 (9.7)    | 77 (12.8)   | 61 (11.3)   | 46 (10.9)   |
| 2007                               | 26 (5.8)     | 23 (5.1)    | 39 (6.5)    | 32 (5.9)    | 21 (5.0)    |
| 2008                               | 33 (7.4)     | 34 (7.5)    | 43 (7.2)    | 39 (7.2)    | 32 (7.6)    |
| 2009                               | 50 (11.2)    | 55 (12.1)   | 70 (11.7)   | 69 (12.7)   | 43 (10.2)   |
| 2010                               | 51 (11.4)    | 48 (10.6)   | 57 (9.5)    | 58 (10.7)   | 43 (10.2)   |
| 2011                               | 96 (21.5)    | 96 (21.2)   | 113 (18.8)  | 113 (20.8)  | 97 (23.0)   |
| 2012                               | 51 (11.4)    | 56 (12.4)   | 80 (13.3)   | 67 (12.4)   | 53 (12.6)   |
| 2013                               | 71 (15.9)    | 74 (16.3)   | 84 (14.0)   | 79 (14.6)   | 72 (17.1)   |
| 2014                               | 0 (0)        | 3 (0.7)     | 1 (0.2)     | 0 (0)       | 0 (0)       |
| <b>Mean (SD) EDI domain scores</b> |              |             |             |             |             |
| PHWB                               | NA           | 5.06 (2.17) | 6.70 (2.33) | 6.82 (2.09) | 7.71 (1.96) |
| SC                                 | 5.42 (2.97)  | NA          | 5.47 (2.54) | 4.78 (2.33) | 5.97 (2.98) |
| EM                                 | 5.90 (2.53)  | 5.42 (1.44) | NA          | 5.65 (1.89) | 6.31 (1.36) |
| LCD                                | 5.39 (3.31)  | 1.98 (2.38) | 5.51 (3.15) | NA          | 6.29 (3.46) |
| CSGK                               | 3.80 (3.34)  | 0.86 (1.91) | 3.77 (3.06) | 2.93 (2.74) | NA          |

PHWB=Physical health & wellbeing; SC=Social competence; EM=Emotional maturity; LCD=Language & cognitive development; CSGK=communication skills & general knowledge

**Table S4: Hierarchical Generalized Linear Model (HGLM) for the Physical Health & Wellbeing (PHWB) main of the Early Development Instrument (EDI)**

| Parameter              | Model 1            |             |         |         | Model 2            |             |           |         | Model 3            |             |           |         |
|------------------------|--------------------|-------------|---------|---------|--------------------|-------------|-----------|---------|--------------------|-------------|-----------|---------|
|                        | B coefficient (SE) | F-statistic | DF      | P-value | B coefficient (SE) | F-statistic | DF        | P-value | B coefficient (SE) | F-statistic | DF        | P-value |
| Intercept              | 3.98 (0.02)        | 47093.34    | 1, 2013 | <0.0001 | 4.75 (1.07)        | 19.80       | 1, 2002   | <0.0001 | 4.65 (1.07)        | 19.10       | 1, 2002   | <0.0001 |
| Year (categorical)     |                    |             |         |         |                    | 3.95        | 10, 26117 | <0.0001 |                    | 4.18        | 10, 26116 | <0.0001 |
| Province (categorical) |                    |             |         |         |                    | 13.94       | 11, 26117 | <0.0001 |                    | 13.54       | 11, 26116 | <0.0001 |
| Year*Province          |                    |             |         |         |                    | 2.54        | 53, 26117 | <0.0001 |                    | 2.91        | 53, 26116 | <0.0001 |
| Age                    |                    |             |         |         | 0.03 (0.03)        | 1.04        | 1, 26117  | 0.3089  | 0.04 (0.03)        | 1.29        | 1, 26116  | 0.2558  |
| Sex (M=0; F=1)         |                    |             |         |         | -0.13 (0.03)       | 22.96       | 1, 26117  | <0.0001 | -0.14 (0.03)       | 24.11       | 1, 26116  | <0.0001 |
| EFSL (no=0; yes=1)     |                    |             |         |         | -0.02 (0.04)       | 0.19        | 1, 26117  | 0.6638  | -0.04 (0.04)       | 0.94        | 1, 26116  | 0.3325  |
| SES z-score            |                    |             |         |         |                    |             |           |         | -0.17 (0.02)       | 116.76      | 1, 26116  | <0.0001 |
| Deviance               | 118982.4           |             |         |         | 118334.9           |             |           |         | 118222.1           |             |           |         |
| AIC                    | 118988.4           |             |         |         | 118494.9           |             |           |         | 118384.1           |             |           |         |
| BIC                    | 119005.2           |             |         |         | 118943.5           |             |           |         | 118838.4           |             |           |         |
| Pearson Chi-Square     | 7394.78            |             |         |         | 7475.81            |             |           |         | 7495.20            |             |           |         |

Note the sign (+/-) of correlation coefficients reflects direction of correlation with transformed EDI domain scores (11 – EDI domain scores).  
 DF=degrees of freedom; EFSL=English/French as a second language AIC=Akaike Information Criterion; BIC-Bayesian Information Criterion

**Table S5: Hierarchical Generalized Linear Model (HGLM) for the Social Competence (SC) Domain of the Early Development Instrument (EDI)**

| Parameter              | Model 1            |             |         |         | Model 2            |             |           |         | Model 3            |             |           |         |
|------------------------|--------------------|-------------|---------|---------|--------------------|-------------|-----------|---------|--------------------|-------------|-----------|---------|
|                        | B coefficient (SE) | F-statistic | Df      | P-value | B coefficient (SE) | F-statistic | Df        | P-value | B coefficient (SE) | F-statistic | Df        | P-value |
| Intercept              | 5.31 (0.02)        | 62975.90    | 1, 2014 | <0.0001 | 4.62 (1.26)        | 13.47       | 1, 2004   | 0.0003  | 4.46 (1.25)        | 12.67       | 1, 2003   | 0.0004  |
| Year (categorical)     |                    |             |         |         |                    | 2.83        | 10, 26106 | 0.0016  |                    | 2.56        | 10, 26106 | 0.0043  |
| Province (categorical) |                    |             |         |         |                    | 10.27       | 11, 26106 | <0.0001 |                    | 10.25       | 11, 26106 | <0.0001 |
| Year*Province          |                    |             |         |         |                    | 2.76        | 53, 26106 | <0.0001 |                    | 2.76        | 53, 26106 | <0.0001 |
| Age                    |                    |             |         |         | 0.13 (0.04)        | 8.99        | 1, 26106  | 0.0027  | 0.13 (0.04)        | 10.12       | 1, 26106  | 0.0015  |
| Sex (M=0; F=1)         |                    |             |         |         | -0.75 (0.04)       | 439.63      | 1, 26106  | <0.0001 | -0.76 (0.04)       | 447.29      | 1, 26106  | <0.0001 |
| EFSL (no=0; yes=1)     |                    |             |         |         | 0.12 (0.06)        | 4.82        | 1, 26106  | 0.0284  | 0.10 (0.05)        | 3.07        | 1, 26106  | 0.0798  |
| SES z-score            |                    |             |         |         |                    |             |           |         | -0.17 (0.02)       | 69.10       | 1, 26106  | <0.0001 |
| Deviance               | 134806.2           |             |         |         | 134020.8           |             |           |         | 133955.4           |             |           |         |
| AIC                    | 134812.2           |             |         |         | 134180.8           |             |           |         | 134117.4           |             |           |         |
| BIC                    | 134829.0           |             |         |         | 134629.5           |             |           |         | 134571.7           |             |           |         |
| Pearson Chi-Square     | 6654.52            |             |         |         | 6723.87            |             |           |         | 6736.70            |             |           |         |

Note the sign (+/-) of correlation coefficients reflects direction of correlation with transformed EDI domain scores (11 – EDI domain scores).

DF=degrees of freedom; EFSL=English/French as a second language AIC=Akaike Information Criterion; BIC-Bayesian Information Criterion

**Table S6: Hierarchical Generalized Linear Model (HGLM) for the Emotional Maturity (EM) Domain of the Early Development Instrument (EDI)**

| Parameter              | Model 1            |             |         |         | Model 2            |             |           |         | Model 3            |             |           |         |
|------------------------|--------------------|-------------|---------|---------|--------------------|-------------|-----------|---------|--------------------|-------------|-----------|---------|
|                        | B coefficient (SE) | F-statistic | Df      | P-value | B coefficient (SE) | F-statistic | Df        | P-value | B coefficient (SE) | F-statistic | Df        | P-value |
| Intercept              | 4.88 (0.02)        | 47093.34    | 1, 2014 | <0.0001 | 4.28 (0.96)        | 19.71       | 1, 2003   | <0.0001 | 4.18 (0.95)        | 19.00       | 1, 2003   | <0.0001 |
| Year (categorical)     |                    |             |         |         |                    | 2.68        | 10, 25974 | 0.0029  |                    | 2.42        | 10, 25793 | <0.0001 |
| Province (categorical) |                    |             |         |         |                    | 9.22        | 11, 25974 | <0.0001 |                    | 9.04        | 11, 25793 | <0.0001 |
| Year*Province          |                    |             |         |         |                    | 2.12        | 53, 25974 | <0.0001 |                    | 2.06        | 53, 25793 | <0.0001 |
| Age                    |                    |             |         |         | 0.08 (0.03)        | 6.17        | 1, 25974  | 0.0130  | 0.08 (0.03)        | 6.63        | 1, 25793  | 0.0101  |
| Sex (M=0; F=1)         |                    |             |         |         | -0.81 (0.03)       | 970.94      | 1, 25974  | <0.0001 | -0.81 (0.03)       | 969.06      | 1, 25793  | <0.0001 |
| EFSL (no=0; yes=1)     |                    |             |         |         | -0.11 (0.04)       | 7.29        | 1, 25974  | 0.0070  | -0.12 (0.04)       | 10.01       | 1, 25793  | 0.0016  |
| SES z-score            |                    |             |         |         |                    |             |           |         | -0.12 (0.01)       | 65.82       | 1, 25793  | <0.0001 |
| Deviance               | 119448.7           |             |         |         | 118202.7           |             |           |         | 118136.1           |             |           |         |
| AIC                    | 119454.7           |             |         |         | 118362.7           |             |           |         | 118298.1           |             |           |         |
| BIC                    | 119471.6           |             |         |         | 118811.3           |             |           |         | 118752.3           |             |           |         |
| Pearson Chi-Square     | 4465.48            |             |         |         | 4421.32            |             |           |         | 4428.30            |             |           |         |

Note the sign (+/-) of correlation coefficients reflects direction of correlation with transformed EDI domain scores (11 – EDI domain scores).  
 DF=degrees of freedom; EFSL=English/French as a second language AIC=Akaike Information Criterion; BIC-Bayesian Information Criterion

**Table S7: Hierarchical Generalized Linear Model (HGLM) for the Language & Cognitive Development (LCD) Domain of the Early Development Instrument (EDI)**

| Parameter              | Model 1            |             |         |         | Model 2            |             |           |         | Model 3            |             |           |         |
|------------------------|--------------------|-------------|---------|---------|--------------------|-------------|-----------|---------|--------------------|-------------|-----------|---------|
|                        | B coefficient (SE) | F-statistic | Df      | P-value | B coefficient (SE) | F-statistic | Df        | P-value | B coefficient (SE) | F-statistic | Df        | P-value |
| Intercept              | 4.82 (0.02)        | 37229.70    | 1, 2014 | <0.0001 | 4.36 (1.33)        | 10.69       | 1, 2003   | 0.0011  | 4.17 (1.33)        | 9.80        | 1, 2003   | 0.0017  |
| Year (categorical)     |                    |             |         |         |                    | 3.78        | 10, 26022 | 0.0029  |                    | 3.49        | 10, 26021 | <0.0001 |
| Province (categorical) |                    |             |         |         |                    | 6.32        | 11, 26022 | <0.0001 |                    | 7.01        | 11, 26021 | <0.0001 |
| Year*Province          |                    |             |         |         |                    | 2.13        | 53, 26022 | <0.0001 |                    | 2.28        | 53, 26021 | <0.0001 |
| Age                    |                    |             |         |         | -0.11 (0.04)       | 6.34        | 1, 26022  | 0.0118  | -0.10 (0.04)       | 5.01        | 1, 26021  | 0.0252  |
| Sex (M=0; F=1)         |                    |             |         |         | -0.13 (0.04)       | 10.35       | 1, 26022  | 0.0013  | -0.13 (0.04)       | 10.42       | 1, 26021  | 0.0013  |
| EFSL (no=0; yes=1)     |                    |             |         |         | 0.48 (0.06)        | 58.32       | 1, 26022  | <0.0001 | 0.43 (0.06)        | 47.13       | 1, 26021  | <0.0001 |
| SES z-score            |                    |             |         |         |                    |             |           |         | -0.29 (0.02)       | 160.80      | 1, 26021  | <0.0001 |
| Deviance               | 135595.0           |             |         |         | 135045.0           |             |           |         | 134891.0           |             |           |         |
| AIC                    | 135601.0           |             |         |         | 135205.0           |             |           |         | 135053.0           |             |           |         |
| BIC                    | 135617.8           |             |         |         | 135653.7           |             |           |         | 135507.3           |             |           |         |
| Pearson Chi-Square     | 10372.47           |             |         |         | 10458.52           |             |           |         | 10531.822          |             |           |         |

Note the sign (+/-) of correlation coefficients reflects direction of correlation with transformed EDI domain scores (11 – EDI domain scores).

DF=degrees of freedom; EFSL=English/French as a second language AIC=Akaike Information Criterion; BIC-Bayesian Information Criterion

**Table S8: Hierarchical Generalized Linear Model (HGLM) for the Communication Skills & General Knowledge (CSGK) Domain of the Early Development Instrument (EDI)**

| Parameter              | Model 1            |             |         |         | Model 2            |             |           |         | Model 3            |             |           |         |
|------------------------|--------------------|-------------|---------|---------|--------------------|-------------|-----------|---------|--------------------|-------------|-----------|---------|
|                        | B coefficient (SE) | F-statistic | Df      | P-value | B coefficient (SE) | F-statistic | Df        | P-value | B coefficient (SE) | F-statistic | Df        | P-value |
| Intercept              | 6.65 (0.03)        | 63312.62    | 1, 2014 | <0.0001 | 6.11 (1.78)        | 11.76       | 1, 2003   | 0.0006  | 4.65 (1.07)        | 19.10       | 1, 2002   | 0.0007  |
| Year (categorical)     |                    |             |         |         |                    | 3.95        | 10, 26141 | 0.0247  |                    | 1.74        | 10, 26140 | 0.0657  |
| Province (categorical) |                    |             |         |         |                    | 13.94       | 11, 26141 | <0.0001 |                    | 5.94        | 11, 26140 | <0.0001 |
| Year*Province          |                    |             |         |         |                    | 2.54        | 53, 26141 | 0.0109  |                    | 1.51        | 53, 26140 | 0.0094  |
| Age                    |                    |             |         |         | 0.13 (0.06)        | 2.05        | 1, 26141  | 0.0258  | 0.13 (0.05)        | 5.19        | 1, 26140  | 0.0227  |
| Sex (M=0; F=1)         |                    |             |         |         | -0.42 (0.05)       | 7.24        | 1, 26141  | <0.0001 | -0.43 (0.05)       | 70.12       | 1, 26140  | <0.0001 |
| EFSL (no=0; yes=1)     |                    |             |         |         | 1.15 (0.08)        | 1.50        | 1, 26141  | <0.0001 | 1.11 (0.08)        | 173.86      | 1, 26140  | <0.0001 |
| SES z-score            |                    |             |         |         |                    |             |           |         | -0.19 (0.02)       | 55.05       | 1, 26140  | <0.0001 |
| Deviance               | 151991.9           |             |         |         | 151438.8           |             |           |         | 151384.1           |             |           |         |
| AIC                    | 151997.9           |             |         |         | 151598.8           |             |           |         | 151544.1           |             |           |         |
| BIC                    | 152014.7           |             |         |         | 152047.5           |             |           |         | 151992.8           |             |           |         |
| Pearson Chi-Square     | 6272.57            |             |         |         | 6810.50            |             |           |         | 6817.77            |             |           |         |

Note the sign (+/-) of correlation coefficients reflects direction of correlation with transformed EDI domain scores (11 – EDI domain scores).

DF=degrees of freedom; EFSL=English/French as a second language AIC=Akaike Information Criterion; BIC-Bayesian Information Criterion

**Table S9: Goodness-of-fit of different distributions and link functions for the social competence domain**

| Domain                                          | Goodness-of-fit statistics | Identity link |          |          | Log link    |          |          |
|-------------------------------------------------|----------------------------|---------------|----------|----------|-------------|----------|----------|
|                                                 |                            | Exponential   | Gamma    | Normal   | Exponential | Gamma    | Normal   |
| Physical health & wellbeing (PHWB)              | AIC                        | 134241.6      | 118384.1 | 121141.6 | 134240.4    | 118399.9 | 121147.4 |
|                                                 | BIC                        | 134684.7      | 118838.4 | 121595.8 | 134683.5    | 118854.2 | 121601.6 |
| Social competence (SC)                          | AIC                        | 150247.6      | 113417.4 | 133234.4 | 150247.5    | 134128.9 | NC       |
|                                                 | BIC                        | 150690.7      | 134571.7 | 133688.7 | 150690.6    | 134583.2 | NC       |
| Emotional maturity (EM)                         | AIC                        | 144859.5      | 118298.1 | 116476.9 | 144859.8    | 118310   | NC       |
|                                                 | BIC                        | 145302.6      | 118752.3 | 116931.2 | 145302.8    | 118764.3 | NC       |
| Language & cognitive development (LCD)          | AIC                        | 144457.3      | 135053.0 | 140742   | 144457.1    | 135069.7 | 140754.4 |
|                                                 | BIC                        | 144900.3      | 135507.3 | 141196.3 | 144900.2    | 135524   | 141208.7 |
| Communication skills & general knowledge (CSGK) | AIC                        | 163276.5      | 151544.1 | 146002.4 | 163274.7    | 151539.4 | NC       |
|                                                 | BIC                        | 163719.5      | 151992.8 | 146456.7 | 163717.8    | 151988.1 | NC       |

AIC=Akaike information criterion; BIC=Bayesian information criterion; NC=not converged

**Table S10: Hierarchical Generalized Linear Model (HGLM) for the Physical Health & Wellbeing (PHWB) Domain of the Early Development Instrument (EDI) excluding outlying and influential cases (n = 687 excluded)**

|                               | <b>B coefficient (SE)</b> | <b>F-statistic</b> | <b>Df</b> | <b>P-value</b> |
|-------------------------------|---------------------------|--------------------|-----------|----------------|
| <b>Intercept</b>              | 4.70 (1.03)               | 20.70              | 1, 1999   | <0.0001        |
| <b>Year (categorical)</b>     |                           | 6.03               | 10, 25432 | <0.0001        |
| <b>Province (categorical)</b> |                           | 19.14              | 11, 25432 | <0.0001        |
| <b>Year*Province</b>          |                           | 4.14               | 53, 25432 | <0.0001        |
| <b>Age</b>                    | 0.02 (0.03)               | 0.63               | 1, 25432  | 0.4265         |
| <b>Sex (M=0; F=1)</b>         | -0.21 (0.03)              | 60.10              | 1, 25432  | <0.0001        |
| <b>EFSL (no=0; yes=1)</b>     | -0.09 (0.04)              | 5.07               | 1, 25432  | 0.0243         |
| <b>SES z-score</b>            | -0.19 (0.02)              | 4.14               | 1, 25432  | <0.0001        |

EFSL=English/French as a second language; Df=degrees of freedom



**Table S11: Hierarchical Generalized Linear Model (HGLM) for the Social Competence (SC) Domain of the Early Development Instrument (EDI) excluding outlying and influential cases (n = 317 excluded)**

|                               | <b>B coefficient (SE)</b> | <b>F-statistic</b> | <b>Df</b> | <b>P-value</b> |
|-------------------------------|---------------------------|--------------------|-----------|----------------|
| <b>Intercept</b>              | 4.54 (1.24)               | 13.47              | 1, 2002   | 0.0003         |
| <b>Year (categorical)</b>     |                           | 5.26               | 10, 25790 | <0.0001        |
| <b>Province (categorical)</b> |                           | 14.83              | 11, 25790 | <0.0001        |
| <b>Year*Province</b>          |                           | 4.43               | 53, 25790 | <0.0001        |
| <b>Age</b>                    | 0.13 (0.04)               | 9.48               | 1, 25790  | 0.0021         |
| <b>Sex (M=0; F=1)</b>         | -0.94 (0.03)              | 736.81             | 1, 25790  | <0.0001        |
| <b>EFSL (no=0; yes=1)</b>     | 0.07 (0.05)               | 1.74               | 1, 25790  | 0.1862         |
| <b>SES z-score</b>            | -0.18 (0.02)              | 86.23              | 1, 25790  | <0.0001        |

EFSL=English/French as a second language; Df=degrees of freedom

**Table S12: Hierarchical Generalized Linear Model (HGLM) for the Emotional Maturity (EM) Domain of the Early Development Instrument (EDI) excluding outlying and influential cases (n = 409 excluded)**

|                               | <b>B coefficient (SE)</b> | <b>F-statistic</b> | <b>Df</b> | <b>P-value</b> |
|-------------------------------|---------------------------|--------------------|-----------|----------------|
| <b>Intercept</b>              | 3.36 (0.91)               | 13.54              | 1, 2001   | 0.0002         |
| <b>Year (categorical)</b>     |                           | 3.84               | 10, 25566 | <0.0001        |
| <b>Province (categorical)</b> |                           | 12.32              | 11, 25566 | <0.0001        |
| <b>Year*Province</b>          |                           | 3.04               | 53, 25566 | <0.0001        |
| <b>Age</b>                    | 0.10 (0.03)               | 10.68              | 1, 25566  | 0.0011         |
| <b>Sex (M=0; F=1)</b>         | -0.91 (0.03)              | 1307.36            | 1, 25566  | <0.0001        |
| <b>EFSL (no=0; yes=1)</b>     | -0.13 (0.04)              | 11.97              | 1, 25566  | 0.0005         |
| <b>SES z-score</b>            | -0.14 (0.01)              | 88.74              | 1, 25566  | <0.0001        |

EFSL=English/French as a second language; Df=degrees of freedom

**Table S13: Hierarchical Generalized Linear Model (HGLM) for the Language & Cognitive Development (LCD) Domain of the Early Development Instrument (EDI) excluding outlying and influential cases (n = 619 excluded)**

|                               | <b>B coefficient (SE)</b> | <b>F-statistic</b> | <b>Df</b> | <b>P-value</b> |
|-------------------------------|---------------------------|--------------------|-----------|----------------|
| <b>Intercept</b>              | 3.43 (1.27)               | 12.11              | 1, 2002   | 0.0005         |
| <b>Year (categorical)</b>     |                           | 5.87               | 10, 25403 | <0.0001        |
| <b>Province (categorical)</b> |                           | 13.29              | 11, 25403 | <0.0001        |
| <b>Year*Province</b>          |                           | 4.16               | 53, 25403 | <0.0001        |
| <b>Age</b>                    | -0.20 (0.04)              | 22.42              | 1, 25403  | <0.0001        |
| <b>Sex (M=0; F=1)</b>         | -0.23 (0.04)              | 36.93              | 1, 25403  | <0.0001        |
| <b>EFSL (no=0; yes=1)</b>     | 0.50 (0.06)               | 67.66              | 1, 25403  | <0.0001        |
| <b>SES z-score</b>            | -0.39 (0.02)              | 278.45             | 1, 25403  | <0.0001        |

EFSL=English/French as a second language; Df=degrees of freedom

**Table S14: Hierarchical Generalized Linear Model (HGLM) for the Communication Skills & General Knowledge (CSGK) Domain of the Early Development Instrument (EDI) excluding outlying and influential cases (n = 2 excluded)**

|                               | <b>B coefficient (SE)</b> | <b>F-statistic</b> | <b>Df</b> | <b>P-value</b> |
|-------------------------------|---------------------------|--------------------|-----------|----------------|
| <b>Intercept</b>              | 6.02 (1.78)               | 11.49              | 1, 2002   | 0.0007         |
| <b>Year (categorical)</b>     |                           | 1.81               | 10, 26139 | 0.0527         |
| <b>Province (categorical)</b> |                           | 7.35               | 11, 26139 | <0.0001        |
| <b>Year*Province</b>          |                           | 1.63               | 53, 26139 | 0.0027         |
| <b>Age</b>                    | 0.13 (0.06)               | 5.09               | 1, 26139  | 0.0241         |
| <b>Sex (M=0; F=1)</b>         | -0.43 (0.05)              | 71.08              | 1, 26139  | <0.0001        |
| <b>EFSL (no=0; yes=1)</b>     | 1.11 (0.08)               | 173.83             | 1, 26139  | <0.0001        |
| <b>SES z-score</b>            | -0.19 (0.03)              | 54.80              | 1, 26139  | <0.0001        |

EFSL=English/French as a second language; Df=degrees of freedom

**STROBE 2007 (v4) Statement—Checklist of items that should be included in reports of *cross-sectional studies***

| Section/Topic             | Item # | Recommendation                                                                                                                                                                       | Reported on page #        |
|---------------------------|--------|--------------------------------------------------------------------------------------------------------------------------------------------------------------------------------------|---------------------------|
| <b>Title and abstract</b> | 1      | (a) Indicate the study’s design with a commonly used term in the title or the abstract                                                                                               | 1                         |
|                           |        | (b) Provide in the abstract an informative and balanced summary of what was done and what was found                                                                                  | 2                         |
| <b>Introduction</b>       |        |                                                                                                                                                                                      |                           |
| Background/rationale      | 2      | Explain the scientific background and rationale for the investigation being reported                                                                                                 | 4-5                       |
| Objectives                | 3      | State specific objectives, including any prespecified hypotheses                                                                                                                     | 5                         |
| <b>Methods</b>            |        |                                                                                                                                                                                      |                           |
| Study design              | 4      | Present key elements of study design early in the paper                                                                                                                              | 5                         |
| Setting                   | 5      | Describe the setting, locations, and relevant dates, including periods of recruitment, exposure, follow-up, and data collection                                                      | 5-6                       |
| Participants              | 6      | (a) Give the eligibility criteria, and the sources and methods of selection of participants                                                                                          | 5                         |
| Variables                 | 7      | Clearly define all outcomes, exposures, predictors, potential confounders, and effect modifiers. Give diagnostic criteria, if applicable                                             | 5-6                       |
| Data sources/ measurement | 8*     | For each variable of interest, give sources of data and details of methods of assessment (measurement). Describe comparability of assessment methods if there is more than one group | 5-6                       |
| Bias                      | 9      | Describe any efforts to address potential sources of bias                                                                                                                            | NA                        |
| Study size                | 10     | Explain how the study size was arrived at                                                                                                                                            | NA; population-level data |
| Quantitative variables    | 11     | Explain how quantitative variables were handled in the analyses. If applicable, describe which groupings were chosen and why                                                         | 6-7                       |
| Statistical methods       | 12     | (a) Describe all statistical methods, including those used to control for confounding                                                                                                | 6-7                       |
|                           |        | (b) Describe any methods used to examine subgroups and interactions                                                                                                                  | NA                        |
|                           |        | (c) Explain how missing data were addressed                                                                                                                                          | 7                         |
|                           |        | (d) If applicable, describe analytical methods taking account of sampling strategy                                                                                                   | 6                         |
|                           |        | (e) Describe any sensitivity analyses                                                                                                                                                | 7                         |

| <b>Results</b>   |     |                                                                                                                                                                                                              |                                                                                                                                                                                                                                                                                                               |
|------------------|-----|--------------------------------------------------------------------------------------------------------------------------------------------------------------------------------------------------------------|---------------------------------------------------------------------------------------------------------------------------------------------------------------------------------------------------------------------------------------------------------------------------------------------------------------|
| Participants     | 13* | (a) Report numbers of individuals at each stage of study—eg numbers potentially eligible, examined for eligibility, confirmed eligible, included in the study, completing follow-up, and analysed            | NA; population-level database.                                                                                                                                                                                                                                                                                |
|                  |     | (b) Give reasons for non-participation at each stage                                                                                                                                                         | NA; population-level database.                                                                                                                                                                                                                                                                                |
|                  |     | (c) Consider use of a flow diagram                                                                                                                                                                           | NA                                                                                                                                                                                                                                                                                                            |
| Descriptive data | 14* | (a) Give characteristics of study participants (eg demographic, clinical, social) and information on exposures and potential confounders                                                                     | Tables 1 and 2                                                                                                                                                                                                                                                                                                |
|                  |     | (b) Indicate number of participants with missing data for each variable of interest                                                                                                                          | Table S3                                                                                                                                                                                                                                                                                                      |
| Outcome data     | 15* | Report numbers of outcome events or summary measures                                                                                                                                                         |                                                                                                                                                                                                                                                                                                               |
| Main results     | 16  | (a) Give unadjusted estimates and, if applicable, confounder-adjusted estimates and their precision (eg, 95% confidence interval). Make clear which confounders were adjusted for and why they were included | Table 3<br><br>Although unadjusted estimates are not presented, VIF statistics were very low, indicating that predictor variables were not correlated with one another. When there is little to no correlation between predictor variables, unadjusted and adjusted effect estimates are likely very similar. |
|                  |     | (b) Report category boundaries when continuous variables were categorized                                                                                                                                    | NA                                                                                                                                                                                                                                                                                                            |
|                  |     | (c) If relevant, consider translating estimates of relative risk into absolute risk for a meaningful time period                                                                                             | NA                                                                                                                                                                                                                                                                                                            |
| Other analyses   | 17  | Report other analyses done—eg analyses of subgroups and interactions, and sensitivity analyses                                                                                                               | 9                                                                                                                                                                                                                                                                                                             |

|                          |    |                                                                                                                                                                            |       |
|--------------------------|----|----------------------------------------------------------------------------------------------------------------------------------------------------------------------------|-------|
| <b>Discussion</b>        |    |                                                                                                                                                                            |       |
| Key results              | 18 | Summarise key results with reference to study objectives                                                                                                                   | 9     |
| Limitations              | 19 | Discuss limitations of the study, taking into account sources of potential bias or imprecision. Discuss both direction and magnitude of any potential bias                 | 11-12 |
| Interpretation           | 20 | Give a cautious overall interpretation of results considering objectives, limitations, multiplicity of analyses, results from similar studies, and other relevant evidence | 10-13 |
| Generalisability         | 21 | Discuss the generalisability (external validity) of the study results                                                                                                      | 12-13 |
| <b>Other information</b> |    |                                                                                                                                                                            |       |
| Funding                  | 22 | Give the source of funding and the role of the funders for the present study and, if applicable, for the original study on which the present article is based              | 13    |

\*Give information separately for cases and controls in case-control studies and, if applicable, for exposed and unexposed groups in cohort and cross-sectional studies.

**Note:** An Explanation and Elaboration article discusses each checklist item and gives methodological background and published examples of transparent reporting. The STROBE checklist is best used in conjunction with this article (freely available on the Web sites of PLoS Medicine at <http://www.plosmedicine.org/>, Annals of Internal Medicine at <http://www.annals.org/>, and Epidemiology at <http://www.epidem.com/>). Information on the STROBE Initiative is available at [www.strobe-statement.org](http://www.strobe-statement.org).

# BMJ Open

## The socioeconomic gradient in the developmental health of children with disabilities at school-entry: a cross-sectional study

|                                 |                                                                                                                                                                                                                                                                                                                                                                                                                                                                                                                                                                                                                                                                                        |
|---------------------------------|----------------------------------------------------------------------------------------------------------------------------------------------------------------------------------------------------------------------------------------------------------------------------------------------------------------------------------------------------------------------------------------------------------------------------------------------------------------------------------------------------------------------------------------------------------------------------------------------------------------------------------------------------------------------------------------|
| Journal:                        | <i>BMJ Open</i>                                                                                                                                                                                                                                                                                                                                                                                                                                                                                                                                                                                                                                                                        |
| Manuscript ID                   | bmjopen-2019-032396.R1                                                                                                                                                                                                                                                                                                                                                                                                                                                                                                                                                                                                                                                                 |
| Article Type:                   | Original research                                                                                                                                                                                                                                                                                                                                                                                                                                                                                                                                                                                                                                                                      |
| Date Submitted by the Author:   | 17-Feb-2020                                                                                                                                                                                                                                                                                                                                                                                                                                                                                                                                                                                                                                                                            |
| Complete List of Authors:       | Zeraatkar, Dena; McMaster University, Health Research Methods, Evidence, and Impact<br>Duku, Eric; McMaster University, Offord Centre for Child Studies<br>Bennett, Teresa ; McMaster University, Offord Centre for Child Studies<br>Guhn, Martin; University of British Columbia, Human Early Learning Partnership, School of Population and Public Health<br>Forer, Barry; University of British Columbia, Human Early Learning Partnership, School of Population and Public Health<br>Brownell, Marni; University of Manitoba, Manitoba Centre for Health Policy, Department of Community Health Sciences<br>Janus, Magdalena; McMaster University, Offord Centre for Child Studies |
| <b>Primary Subject Heading</b>: | Paediatrics                                                                                                                                                                                                                                                                                                                                                                                                                                                                                                                                                                                                                                                                            |
| Secondary Subject Heading:      | Paediatrics, Public health, Health policy, Health services research                                                                                                                                                                                                                                                                                                                                                                                                                                                                                                                                                                                                                    |
| Keywords:                       | Community child health < PAEDIATRICS, SOCIAL MEDICINE, PUBLIC HEALTH, Developmental neurology & neurodisability < PAEDIATRICS                                                                                                                                                                                                                                                                                                                                                                                                                                                                                                                                                          |
|                                 |                                                                                                                                                                                                                                                                                                                                                                                                                                                                                                                                                                                                                                                                                        |

SCHOLARONE™  
Manuscripts





I, the Submitting Author has the right to grant and does grant on behalf of all authors of the Work (as defined in the below author licence), an exclusive licence and/or a non-exclusive licence for contributions from authors who are: i) UK Crown employees; ii) where BMJ has agreed a CC-BY licence shall apply, and/or iii) in accordance with the terms applicable for US Federal Government officers or employees acting as part of their official duties; on a worldwide, perpetual, irrevocable, royalty-free basis to BMJ Publishing Group Ltd ("BMJ") its licensees and where the relevant Journal is co-owned by BMJ to the co-owners of the Journal, to publish the Work in this journal and any other BMJ products and to exploit all rights, as set out in our [licence](#).

The Submitting Author accepts and understands that any supply made under these terms is made by BMJ to the Submitting Author unless you are acting as an employee on behalf of your employer or a postgraduate student of an affiliated institution which is paying any applicable article publishing charge ("APC") for Open Access articles. Where the Submitting Author wishes to make the Work available on an Open Access basis (and intends to pay the relevant APC), the terms of reuse of such Open Access shall be governed by a Creative Commons licence – details of these licences and which [Creative Commons](#) licence will apply to this Work are set out in our licence referred to above.

Other than as permitted in any relevant BMJ Author's Self Archiving Policies, I confirm this Work has not been accepted for publication elsewhere, is not being considered for publication elsewhere and does not duplicate material already published. I confirm all authors consent to publication of this Work and authorise the granting of this licence.

1  
2  
3 **The socioeconomic gradient in the developmental health of children with disabilities at school-entry:**  
4 **a cross-sectional study**  
5

6 Dena Zeraatkar, *PhD student* Department of Health Research Methods, Evidence, and Impact, McMaster  
7 University  
8

9 Eric Duku, *Assistant professor* Offord Centre for Child Studies, Department of Psychiatry and Behavioural  
10 Neurosciences  
11

12 Teresa Bennett, *Child psychiatrist and assistant professor* Offord Centre for Child Studies, Department of  
13 Psychiatry and Behavioural Neurosciences  
14

15 Martin Guhn, *Assistant professor* Human Early Learning Partnership, School of Population and Public  
16 Health, University of British Columbia, Vancouver, British Columbia, Canada  
17

18 Barry Forer, PhD, *Research methodologist* Human Early Learning Partnership, School of Population and  
19 Public Health, University of British Columbia, Vancouver, British Columbia, Canada  
20

21 Marni Brownell, *Professor* Manitoba Centre for Health Policy, Department of Community Health  
22 Sciences, University of Manitoba, Winnipeg, Manitoba, Canada  
23

24 Magdalena Janus, *Professor* Offord Centre for Child Studies, Department of Psychiatry and Behavioural  
25 Neurosciences  
26

27  
28  
29  
30 Corresponding author:

31 Dr. Magdalena Janus

32 Offord Centre for Child Studies, Department of Psychiatry and Behavioural Neurosciences, McMaster  
33 University

34 1280 Main Street West

35 MIP 201A,

36 Hamilton, ON L8S 4K1, Canada

37 Tel: 905-574-6665 ext. 21418

38 E-mail: janusm@mcmaster.ca  
39  
40  
41  
42  
43

44 Word count: 3,235  
45  
46  
47

48 Keywords: developmental health, neighborhood SES, Early Development Instrument, cross-sectional  
49 study  
50  
51  
52  
53  
54  
55  
56  
57  
58  
59  
60

## Abstract

**Objective:** To examine the relationship between developmental health and neighborhood SES in kindergarten children with disabilities.

**Design:** Cross-sectional study using population-level database of children's developmental health at school entry (2002 – 2014).

**Setting:** 12 of 13 Canadian provinces/territories.

**Measures:** Taxfiler and Census data from 2005 and 2006, respectively, were aggregated according to custom-created neighborhood boundaries and used to create an index of neighborhood-level SES.

Developmental health outcomes were measured using the Early Development Instrument (EDI) that evaluates developmental health across five domains and is completed by teachers in the second-half of the kindergarten year for every child in their class based on their observations of the child during the first half of the year.

**Analysis:** Hierarchical generalized linear models were used to test the association between neighborhood-level SES and developmental health.

**Results:** All EDI domains were positively correlated with the neighborhood-level SES index. The strongest association was observed for the language & cognitive development domain ( $\beta$  (SE): 0.29 (0.02)) and the weakest association was observed for the emotional maturity domain ( $\beta$  (SE): 0.12 (0.01)).

**Conclusions:** The magnitude of differences observed in EDI scores across neighborhoods at the 5<sup>th</sup> and 95<sup>th</sup> percentiles are similar to the effects of more established predictors of development, such as sex. The association of SES with developmental outcomes in this population may present a potential opportunity for policy interventions to improve immediate and longer-term outcomes.

### Strengths and limitations of this study

- Our investigation uses a large, representative population-level database, that allowed us to focus on children with disabilities that make up only a small proportion of the population, while also maximizing external validity and statistical power and minimizing potential selection bias.
- We used data from the EDI, a valid and reliable measure of children's developmental health.
- We focused on early childhood, a time that has been well documented to critically impact children's long-term academic and social trajectory.
- We applied a non-categorical approach to childhood disabilities that reflects current thinking in the field of child development.
- The study's limitation is the exclusive use of neighborhood-level socioeconomic status indicators, without the ability to control for family-level ones.

## Introduction

To date, associations between a number of health outcomes and a combination of economic, human, and social characteristics, commonly conceptualized as socioeconomic gradients, have been reported, including end-stage renal disease, breast cancer, obesity, and cardiometabolic health.<sup>1-6</sup> These studies have mostly focused on chronic conditions in adulthood, with studies on the socioeconomic determinants of child health emerging only more recently.<sup>7-11</sup>

A socioeconomic gradient in typically developing children's developmental health has been reported in a number of high-, middle-, and low-income countries,<sup>12-14</sup> including Canada.<sup>8 15-17</sup> Additionally, the prevalence of childhood disabilities has been consistently shown to be negatively associated with SES.<sup>18</sup> Stabile & Currie (2003) used data from the Canadian National Longitudinal Survey of Children and Youth (NLSCY) for children between 0 and 11 years of age to illustrate an inverse relationship between the prevalence of chronic childhood disabilities and SES.<sup>19</sup> Msall and colleagues (2007) reported a more than three-fold difference in disability rates between children living in distressed vs. advantaged neighborhoods in Rhode Island.<sup>20</sup> However, little is known about the relationship between SES and developmental outcomes in children with special needs. Existing evidence most often addresses specific diagnoses during middle childhood, is not representative of all disabilities experienced by children during early childhood, and does not consider the impact of SES outside of the immediate family environment (i.e., neighborhood SES) which has been shown to be a significant influence on developmental outcomes in typically developing children.<sup>8 21 22,23</sup> Understanding determinants of developmental health in early childhood can help in identifying groups of children with disabilities that are likely to be most at risk for worse academic and social outcomes later in life. Such identification is useful for policy planning and the provision of health and education services. The objective of this study is to determine if there is a socioeconomic gradient in the developmental health of children with disabilities at school entry. This work extends existing research in that it focuses on

1  
2  
3 early childhood, a time at which experiences set the trajectory for future academic and social outcomes,  
4  
5 takes a diagnosis-free, non-categorical approach to childhood disability, and uses population-level data.  
6

## 7 8 **Methods**

9  
10 The project was approved by the Hamilton Integrated Research Ethics Board (no. 2403).  
11

### 12 ***Patient and Public Involvement***

13  
14 Patients/the public were not involved in the design or conduct of this study.  
15

### 16 ***Data Source and Measurement***

17  
18 Data for this study come from a Pan-Canadian database on early childhood development.<sup>8,24</sup> The  
19  
20 database includes cross-sectional data from all Canadian provincial implementations between 2004 and  
21  
22 2014 of the Early Development Instrument (EDI), a population-level instrument developed by Janus and  
23  
24 Offord (2007). The EDI is used to evaluate children's developmental health outcomes during the  
25  
26 kindergarten year across five core domains: physical health & wellbeing, social competence, emotional  
27  
28 maturity, language & cognitive development, and communication skills & general knowledge.<sup>25</sup> The EDI  
29  
30 is completed by teachers in the second half of the kindergarten year (the year before Grade 1) - usually  
31  
32 between February and March - based on their observations of each child. It is comprised of 103 core  
33  
34 items, and domain scores range from 0 to 10, with higher scores indicating better developmental health.  
35  
36 The EDI has been validated extensively for both typically-developing children<sup>25-34</sup> and those with  
37  
38 disabilities.<sup>35</sup>  
39  
40  
41  
42

43 The database also includes data on children's age, sex, and whether they have a "special needs"  
44  
45 designation.<sup>24</sup> The "special needs" designation is the operational indicator of childhood disability in our  
46  
47 study. Definitions of "special needs" are set by each province/territory,<sup>36,37</sup> but they are similar and  
48  
49 generally include children with identified health problems, with or without formal medical diagnoses,  
50  
51 that impede their ability to learn in a regular classroom. Children encompassed by this definition have a  
52  
53 broad range of impairments, varying widely in both type (e.g., physical or mental) and severity (e.g., mild  
54  
55  
56  
57  
58  
59  
60

1  
2  
3 speech impairment to non-verbal). The most common disabilities in this population include learning  
4 disabilities and speech impairments, which is consistent with the prevalence of disabilities in children at  
5 school entry in developed countries.<sup>38 39</sup> The EDI database has been linked to Canadian Census and  
6 Taxfiler data from 2006 and 2005, respectively, using custom-created neighborhood boundaries.<sup>40</sup>  
7  
8 Briefly, the neighborhood boundaries were defined using Statistics Canada's dissemination blocks and  
9  
10 were created to contain a minimum of 50 and a maximum of 600 valid EDI records per neighborhood.  
11  
12 The criterion of having at least 50 EDI records per neighborhood was based on empirical data on EDI  
13  
14 reliability. The custom-created neighborhood boundaries were based on existing administrative and  
15  
16 geographic divisions and were created in consultation with provincial/territorial governments, to  
17  
18 maximize their meaningfulness. Guhn et al. (2016) provide a more detailed description of the process  
19  
20 for neighborhood boundary definition.<sup>40</sup> Census and Taxfiler variables were used to create the Canadian  
21  
22 Neighborhoods and Early Child Development (CanNECD) SES index, which includes indicators of  
23  
24 education, language/immigration, marital status, wealth, income, dues, social capital, poverty,  
25  
26 residential stability, and income inequality (Table S1).  
27  
28  
29  
30  
31  
32  
33

### 34 **Analysis**

35  
36 All data analyses were conducted in SAS<sup>TM</sup> software using the GLIMMIX procedure.<sup>41</sup> Given that EDI  
37  
38 domain scores are skewed and restricted in range, and that children are clustered within neighborhoods  
39  
40 and schools, the data were analyzed using hierarchical generalized linear modeling (HGLM). The fit of a  
41  
42 range of distributions and link functions were assessed and it was found that the identify link and  
43  
44 gamma distribution produced the best model fit. EDI data were transformed by subtraction from 11 to  
45  
46 allow for the gamma distribution to accommodate the left skew. Although children are clustered within  
47  
48 two levels (neighborhoods and schools), only neighborhood of residence was included as a cluster  
49  
50 variable due to data sparseness.<sup>42</sup> All models were performed using the Laplace approximation that  
51  
52  
53  
54  
55  
56  
57  
58  
59  
60

1  
2  
3 allows estimation of likelihood statistics and has been shown to perform well with regard to accuracy  
4  
5 and precision.<sup>43</sup>  
6

7 EDI domain scores were used as the dependent variable. For each EDI domain, the analysis was  
8  
9 performed hierarchically in three steps. First, an intercept-only model was constructed. Second, a model  
10  
11 with child-level characteristics that have been found to be significant predictors of children's  
12  
13 developmental health (i.e., age, sex, and English/French language learner status (EFSL)) as fixed-effects  
14  
15 was constructed.<sup>25 38</sup> Additionally, year of data collection, province, and the interaction between the two  
16  
17 were included as categorical variables to control for variations in data collection procedures across time  
18  
19 points and provinces. Finally, to evaluate the association between neighborhood-level SES and children's  
20  
21 developmental health, the SES index was added in the third model. Random effects of each of the  
22  
23 individual predictors were added to the final model one-by-one and the overall improvement in the fit  
24  
25 of the model was tested.  
26  
27  
28  
29

30 To assess whether the inclusion of child-level characteristics (age, sex, EFSL status),  
31  
32 neighborhood-level SES, and random effects significantly improved model fit, partial likelihood ratio  
33  
34 tests were performed, and goodness-of-fit indices (i.e., Akaike Information Criterion (AIC), Bayesian  
35  
36 Information Criterion (BIC)) were compared between models. Multicollinearity was tested by examining  
37  
38 variance inflation factor (VIF) statistics for age, sex, EFSL status, and the SES index. VIF statistics for  
39  
40 province of residence, time of data collection, and their interaction are not included as these were  
41  
42 artificially inflated due to having been dummy coded and included as part of a regression model with  
43  
44 few predictors. Leverage statistics, along with plots of raw, Pearson, and studentized residuals were  
45  
46 used to identify outliers and influential observations. Observations with leverage statistics more than  
47  
48 twice the mean of all leverage values were investigated for data entry error. A sensitivity analysis was  
49  
50 conducted where observations with outlying studentized residuals, defined as studentized residuals with  
51  
52 absolute values greater than two, were excluded in the estimation of the models. Cases with missing  
53  
54  
55  
56  
57  
58  
59  
60



1  
2  
3 data were excluded from the analysis but were compared to those without missing data to ensure no  
4  
5 substantial differences in demographic characteristics.  
6

## 7 8 **Results**

### 9 10 ***Population Characteristics***

11  
12 A total of 29,520 children with disabilities were identified in the database. Population characteristics are  
13  
14 presented in Table 1.  
15

16  
17 These children resided in 2,016 neighborhoods. Neighborhood characteristics are presented in  
18  
19 Table 2. Forty (1.95%) neighborhoods in the database were excluded from the analysis due to not having  
20  
21 any children with special needs (Table S2). These neighborhoods included fewer children overall, were  
22  
23 of higher SES, and did not proportionally represent Canadian provinces as the majority were in Quebec.  
24

25  
26 Characteristics of children missing any one of the five EDI domain scores are presented in Table  
27  
28 S3. Overall, only a small proportion of children (<2%) were missing data on any of the EDI domains and  
29  
30 these children did not differ in demographic characteristics from the analytic sample.  
31

### 32 33 ***Model Results***

34  
35 Regression coefficients, their levels of significance, and goodness-of-fit indices from the final model for  
36  
37 each of the EDI domains are presented in Table 3. Additional details on each step of model development  
38  
39 along with goodness-of-fit indices are presented in supplementary tables 4 through 8. The gamma  
40  
41 distribution with an identity link produced the best fit for most domains, as assessed by AIC and BIC  
42  
43 statistics (Table S9). Random effects of predictors did not significantly improve fit and so they were not  
44  
45 included in the final model.  
46

47  
48 The results of the regression analysis indicate that both child-level characteristics and SES are  
49  
50 significant predictors of children's EDI domain scores, as indicated by decreasing deviance, AIC, and BIC  
51  
52 statistics across models, as well as significant likelihood ratio tests (supplementary tables 4 through 8).  
53  
54  
55  
56  
57  
58  
59

1  
2  
3 Year of data collection, province/territory, and the interaction between them were statistically  
4 significant for all domains. Age was statistically significant for all domains except physical health &  
5 wellbeing. Age was positively associated with language and cognitive development scores, and  
6 negatively with emotional maturity, social competence, and communication skills & general knowledge,  
7 with the largest effect sizes seen in the latter two domains and the smallest in physical health &  
8 wellbeing. Sex was statistically significant for all EDI domains and, on average, girls had higher scores  
9 than boys on all domains of the EDI, with the smallest sex differences in language & cognitive  
10 development, and largest in emotional maturity. English/French language learners had higher scores  
11 than non-learners in emotional maturity (smallest absolute effect) but lower scores in language &  
12 cognitive development and communication skills & general knowledge (largest absolute effect). The SES  
13 index was a statistically significant predictor of all EDI domains and was consistently positively  
14 associated with all domain scores. The smallest association was observed for the emotional maturity  
15 scores, and the largest for and language & cognitive development.

### 31 32 ***Model Diagnostics and Sensitivity Analyses***

33  
34 Excluding categorical variables, all VIF statistics were below the cut-off of 10 and ranged from 1.05 and  
35 1.10. Studentized residuals were used to identify influential and outlying observations. The results of the  
36 sensitivity analysis excluding cases with absolute studentized residual values greater than 2 are  
37 presented in Table S10 through 14. The results from this sensitivity analysis were very similar to the  
38 results of the primary analysis.

### 39 40 41 42 43 44 45 46 **Discussion**

47  
48 The objective of this investigation was to examine the association between neighborhood-level SES and  
49 developmental health in children with disabilities (operationally defined as “special needs” designation)  
50 at school entry, in order to determine the importance of contextual factors in predicting outcomes in  
51 this population. The results indicate that neighborhood-level SES is a consistent and significant predictor  
52  
53  
54  
55  
56  
57  
58  
59  
60

1  
2  
3 of developmental outcomes in this population. An average difference of 0.12 to 0.29 points in EDI  
4  
5 domain scores was observed per standard deviation difference in SES, with higher EDI domain scores  
6  
7 being observed in higher SES neighborhoods. Neighborhood-level SES had the strongest association with  
8  
9 the language & cognitive development domain and the weakest with emotional maturity domain.  
10  
11

### 12 ***Consistency with previous studies***

13  
14 Comparing the magnitude of association between SES and developmental health with previous  
15  
16 literature is difficult due to differences in the operationalization of these constructs and differences in  
17  
18 analytic methods. Previous studies, mostly conducted with typically developing children,<sup>12</sup> have either  
19  
20 explored the direct association between SES and developmental health<sup>8 15-17 44</sup> or investigated mediators  
21  
22 of this relationship, including parent/child activities, access to a computer, participation in organized  
23  
24 classes and activities, and maternal mental health.<sup>45-47</sup> Most of these studies measured SES at the  
25  
26 individual family level and all demonstrated a positive association between social and economic  
27  
28 variables and developmental health.  
29  
30  
31

32 Among the studies done in typically developing populations, five use EDI outcomes, with four  
33  
34 including neighborhood-level measures of SES.<sup>8 15 17 48</sup> All studies demonstrated a positive association  
35  
36 between SES and the EDI. Webb et al. compared neighborhood effects in typically developing children  
37  
38 using four published neighborhood SES indices.<sup>8</sup> Forer et al. examined the same association using the  
39  
40 CanNECD index. Both these studies showed that the strength of association between the indices and EDI  
41  
42 domains varied, depending on the domain and SES index used. Similar to our results, the strongest  
43  
44 association was consistently found for the language & cognitive development domain.  
45  
46  
47

48 The few studies done in children with disabilities also report a positive association between SES  
49  
50 and academic and social outcomes.<sup>21-23 49-51</sup> These studies are different from the present investigation in  
51  
52 that they only focus on a few high-incidence diagnoses, such as learning disabilities during middle  
53  
54 childhood and adolescence and do not measure SES at the neighborhood-level.  
55  
56  
57  
58  
59  
60

### ***Strengths and limitations***

There are several strengths of this study. First, we used population-level data, which made focusing on children with disabilities that only make up a small proportion of the population possible, while also maximizing external validity and statistical power and minimizing potential selection bias. Second, we focused on early childhood, a time that critically impacts children's long-term academic and social trajectory.<sup>52</sup> Third, we applied a non-categorical approach to childhood disabilities which reflects current thinking in the field of child development and findings that diagnostic categories often do not fully reflect the actual abilities and needs of children.<sup>53-55</sup> Fourth, the EDI has undergone extensive reliability and validity testing, and has been found to be predictive of academic achievement and social functioning throughout early and middle childhood.<sup>25-34</sup> The psychometric performance of the EDI in children with special needs has also been found similar to its performance in typically developing children.<sup>35</sup> Currently, the EDI is the only available indicator of developmental health that allows examination of variability across Canada at a population-level. Finally, the analytic methods used in this investigation appropriately take into account the skewed distribution and nesting of EDI data, which prevents artificially deflated standard errors and hence inappropriate statistically significant findings.

This investigation is also subject to limitations. First, due to the cross-sectional design of this study, causality cannot be established. There is evidence that developmental problems in children may increase parental stress and impact the general socioeconomic wellbeing of families.<sup>56 57</sup> Additionally, there is the possibility of self-selection where families with similar experiences may choose to reside within similar neighborhoods. Regardless of causality, or lack thereof, the results of this study indicate that services aimed at young children with disabilities that are particularly accessible in low SES neighborhoods are likely to be most impactful.

Second, we used a very broad definition of disability, which is based on the designation of the child by the education system at kindergarten, and hence, children with disabilities who did not have

1  
2  
3 this designation by the education system were excluded. It is possible that a very small minority of  
4  
5 children who were not typically developing but did not have this designation were excluded.  
6

7  
8 Third, the SES index may not accurately reflect the socioeconomic condition of the  
9  
10 neighborhoods in which children were raised. The variables used to construct the SES index come from  
11  
12 2005 and 2006, whereas EDI data were collected between 2004 and 2014. It is possible that changes in  
13  
14 neighborhoods or relocation of families could render the SES index less reflective of the true early  
15  
16 environment for some groups of children, which may have led to underestimation of the association  
17  
18 between SES and developmental outcomes. However, empirical evidence indicates that it is unlikely for  
19  
20 neighborhood characteristics to drastically change over time or for families move to neighborhoods  
21  
22 which are greatly different from their previous ones.<sup>58</sup> This appears to be confirmed by the remarkable  
23  
24 stability of the CanNECD SES Index, the measure used in this study, over the period of five years.<sup>48</sup>  
25  
26

27  
28 Finally, we were unable to control for family-level SES in the models. Thus, it is not possible to  
29  
30 determine whether this association is driven by neighborhood or family characteristics. We were also  
31  
32 unable to control for specific diagnoses or severity of disabilities that have undoubted impact on child  
33  
34 development. Similar investigation should be extended for smaller subgroups of children who share  
35  
36 diagnoses or functional impairments.  
37

### 38 39 **Implications**

40  
41 Our findings indicate that the relationship between SES and developmental outcomes also holds for  
42  
43 children with disabilities.<sup>8 15-17 44 59</sup> This underscores the potential impact of the early environment of  
44  
45 children on their development. Although clinicians often focus on biological factors, such as family  
46  
47 history of disabilities and harmful exposures in utero, social influences have commonly been found to be  
48  
49 more predictive of long-term developmental and academic outcomes and may be more amenable to  
50  
51 change.<sup>44</sup> According to survey data, clinicians are receptive to screening for social determinants of  
52  
53 health outside of the purview of clinical care, suggesting that the findings of this investigation are likely  
54  
55  
56  
57  
58  
59  
60

1  
2  
3 to be relevant and acceptable to those in the clinical community.<sup>60</sup> Our findings show that the  
4  
5 association between child development and socioeconomic status, which is well-established for typically  
6  
7 developing children, also exists for children with disabilities. This highlights the urgency for improving  
8  
9 the social and economic context in which children are raised, in addition to targeted interventions  
10  
11 delivered at the individual child level. Failure to do so will likely result in further perpetuation of  
12  
13 inequities in child development – more so as children with disabilities are already among the most  
14  
15 disadvantaged groups globally.<sup>18 61</sup> It remains to be seen whether large-scale policy interventions can  
16  
17 help in reducing disparities in this population similarly to other groups.<sup>62</sup>  
18  
19  
20

21 It is important to consider the findings in context of the availability of support services for  
22  
23 children with special needs in Canada prior to school entry. The strategies, programs, and accessibility  
24  
25 vary by province/territory, and often within jurisdictions, as municipal and regional health units are  
26  
27 often service providers, but generally access is easier for children with a specific diagnosis than for those  
28  
29 with unspecified disorders.<sup>54</sup> While there are no detailed studies on the potential association of service  
30  
31 availability or magnitude of waiting lists with neighborhood SES per se, there could be at least two  
32  
33 pathways to such relation. First, services tend to be located in large urban centres (with likely higher SES  
34  
35 overall), where there are more professionals.<sup>63 64</sup> Second, navigation of the care systems, especially for  
36  
37 preschool children rests largely on the shoulders of parents: the ability to do so effectively is likely  
38  
39 associated with their personal and economic resources and where they live.<sup>65 66</sup>  
40  
41  
42  
43

44 Additional investigations could further strengthen and contextualize these findings. Specifically,  
45  
46 establishing the consistency and relative strength of the relationship between SES and developmental  
47  
48 outcomes across subgroups of physical, behavioral, and learning disabilities, as well as subgroups based  
49  
50 on severity of condition and time of diagnosis, would further untangle the relationship between SES,  
51  
52 disabilities, and development, and would be helpful in identifying service provision strategies that are  
53  
54 likely to be most successful in improving outcomes.  
55  
56  
57  
58  
59  
60

## Conclusion

The results from this investigation show neighborhood SES to be significantly associated with the developmental health of children with disabilities at school entry. These findings have implications for policy planning and provision of health and educational service and draw attention to the universality of importance of contextual factors for development of all children.

**Funding:** This work was supported by an operating grant from the Canadian Institutes of Health Research, grant number 142416. DZ was supported by a Canada Graduate Scholarships-Master's Award and is currently supported by a CIHR Doctoral Award. TB is supported by a Hamilton Health Sciences Early Career Award. MJ is supported by the Ontario Chair in Early Childhood Development.

**Competing interests:** None.

**Contributions:** DZ, ED, TB, MJ, MG, BF, and MB conceived the study. DZ analyzed and ED provided technical expertise. DZ wrote the first draft of the manuscript and all authors made significant contributions to the manuscript.

**Data sharing statement:** The dataset analyzed in the current study is not publicly available due to multiple jurisdictional privacy restrictions, but it is available at the host institution.

## References

1. Marmot MG, Rose G, Shipley M, et al. Employment grade and coronary heart disease in British civil servants. *J Epidemiol Community Health* 1978;32(4):244-49.
2. Marmot MG, Stansfeld S, Patel C, et al. Health inequalities among British civil servants: the Whitehall II study. *The Lancet* 1991;337(8754):1387-93.
3. Hill KE, Gleadle JM, Pulvirenti M, et al. The social determinants of health for people with type 1 diabetes that progress to end-stage renal disease. *Health Expect* 2015;18(6):2513-21.
4. Shariff-Marco S, Yang J, John EM, et al. Intersection of race/ethnicity and socioeconomic status in mortality after breast cancer. *J Community Health* 2015;40(6):1287-99.
5. Tomayko E, Flood T, Tandias A, et al. Linking electronic health records with community-level data to understand childhood obesity risk. *Pediatric obesity* 2015;10(6):436-41.
6. Puckrein GA, Egan BM, Howard G. Social and Medical Determinants of Cardiometabolic Health: The Big Picture. *Ethn Dis* 2015;25(4):521.
7. Keating DP, Hertzman C. Developmental health and the wealth of nations: Social, biological, and educational dynamics: Guilford Press 2000.
8. Webb S, Janus M, Duku E, et al. Neighbourhood socioeconomic status indices and early childhood development. *SSM Popul Health* 2017;3:48-56.
9. Frederick CB, Snellman K, Putnam RD. Increasing socioeconomic disparities in adolescent obesity. *Proc Natl Acad Sci* 2014;111(4):1338-42.
10. Cabieses B, Pickett KE, Wilkinson RG. The Impact of Socioeconomic Inequality on Children's Health and Well-being. *The Oxford Handbook of Economics and Human Biology*: Oxford University Press 2016:244.
11. Wang C, Guttmann A, To T, et al. Neighborhood income and health outcomes in infants: how do those with complex chronic conditions fare? *Arch Pediatr Adolesc Med* 2009;163(7):608-15.
12. Letourneau NL, Duffett-Leger L, Levac L, et al. Socioeconomic status and child development: A meta-analysis. *Emot Behav Disord* 2013;21(3):211-24.
13. Kershaw P, Forer B, Irwin LG, et al. Toward a social care program of research: A population-level study of neighborhood effects on child development. *Early Educ Dev* 2007;18(3):535-60.
14. Carpiano RM, Lloyd JE, Hertzman C. Concentrated affluence, concentrated disadvantage, and children's readiness for school: A population-based, multi-level investigation. *Soc Sci Med* 2009;69(3):420-32.
15. Oliver LN, Dunn JR, Kohen DE, et al. Do neighbourhoods influence the readiness to learn of kindergarten children in Vancouver? A multilevel analysis of neighbourhood effects. *Environ Plan A* 2007;39(4):848-68.
16. Guhn M, Gadermann AM, Hertzman C, et al. Children's development in kindergarten: A multilevel, population-based analysis of ESL and gender effects on socioeconomic gradients. *Child Indic Res* 2010;3(2):183-203.
17. Lapointe VR, Ford L, Zumbo BD. Examining the relationship between neighborhood environment and school readiness for kindergarten children. *Early Educ Dev* 2007;18(3):473-95.
18. Spencer NJ, Blackburn CM, Read JM. Disabling chronic conditions in childhood and socioeconomic disadvantage: a systematic review and meta-analyses of observational studies. *BMJ open* 2015;5(9):e007062.
19. Stabile M, Currie J. Socioeconomic Status and Child Health: Why Is the Relationship Stronger for Older Children? *Am Econ Rev* 2003;93(5):1813-23.
20. Msall ME, Avery RC, Msall ER, et al. Distressed neighborhoods and child disability rates: analyses of 157 000 school-age children. *Dev Med Child Neurol* 2007;49(11):814-17.



- 1
- 2
- 3 21. Turner S, Alborz A, Gayle V. Predictors of academic attainments of young people with Down's
- 4 syndrome. *J Intellect Disabil Res* 2008;52(5):380-92.
- 5 22. Turner S, Sloper P, Knussen C, et al. Socio-economic factors: their relationship with child and family
- 6 functioning for children with Down's syndrome. *J Appl Res Intellect Disabil* 1991;4(1):80-100.
- 7 23. Szumski G, Karwowski M. School achievement of children with intellectual disability: The role of
- 8 socioeconomic status, placement, and parents' engagement. *Res Dev Disabil* 2012;33(5):1615-
- 9 25.
- 10 24. Janus M, Brownell, M., Reid-Westoby, C., Bennet, T., Birken, C., Coplan, R., Duku, E., Ferro, M. A.,
- 11 Forer, B., Georgiades, S., Gorter, J. W., Guhn, M., Maguire, J., Manson, H., Pei, J., Santos, R. .
- 12 Establishing a protocol for building a pan-Canadian population-based monitoring system for
- 13 early childhood development for children with health disorders - Canadian Children's Health in
- 14 Context Study (CCHICS). *BMJ Open* 2018 (in press)
- 15 25. Janus M, Offord DR. Development and psychometric properties of the Early Development
- 16 Instrument (EDI): A measure of children's school readiness. *Can J Behav Sci* 2007;39(1):1.
- 17 26. Janus M, Hughes D, Duku E. Patterns of school readiness among selected subgroups of Canadian
- 18 children: Children with special needs and children with diverse language backgrounds. *CCL* 2010
- 19 27. Andrigh D, Styles I. Final Report on the Psychometric Analysis of the Early Development Instrument
- 20 (EDI) Using the Rasch Model: A Technical Paper Commissioned for the Development of the
- 21 Australian Early Development Instrument (AEDI): Citeseer 2004.
- 22 28. Forget-Dubois N, Lemelin J-P, Boivin M, et al. Predicting early school achievement with the EDI: A
- 23 longitudinal population-based study. *Early Educ Dev* 2007;18(3):405-26.
- 24 29. Guhn M, Gadermann A, Zumbo BD. Does the EDI measure school readiness in the same way across
- 25 different groups of children? *Early Educ Dev* 2007;18(3):453-72.
- 26 30. Guhn M, Goelman H. Bioecological theory, early child development and the validation of the
- 27 population-level early development instrument. *Soc Indic Res* 2011;103(2):193-217.
- 28 31. Janus M, Brinkman SA, Duku EK. Validity and psychometric properties of the early development
- 29 instrument in Canada, Australia, United States, and Jamaica. *Soc Indic Res* 2011;103(2):283-97.
- 30 32. Brinkman S, Gregory T, Harris J, et al. Associations between the early development instrument at age
- 31 5, and reading and numeracy skills at ages 8, 10 and 12: a prospective linked data study. *Child*
- 32 *Indic Res* 2013;6(4):695-708.
- 33 33. Davies S, Janus M, Duku E, et al. Using the Early Development Instrument to examine cognitive and
- 34 non-cognitive school readiness and elementary student achievement. *Early Child Res Q*
- 35 2016;35:63-75.
- 36 34. Forer B, Zumbo BD. Validation of multilevel constructs: Validation methods and empirical findings for
- 37 the EDI. *Soc Indic Res* 2011;103(2):231.
- 38 35. Janus M, Zeraatkar D, Duku E, et al. Validation of the Early Development Instrument for children with
- 39 special health needs. *Paediatr Child Health* 2018:1-7.
- 40 36. Janus M, Lefort J, Cameron R, et al. Starting kindergarten: Transition issues for children with special
- 41 needs. *CJE* 2007:628-48.
- 42 37. Dworet D, Bennett S. A view from the north: Special education in Canada. *TEC* 2002;34(5):22.
- 43 38. Goldfeld S, O'Connor M, Sayers M, et al. Prevalence and correlates of special health care needs in a
- 44 population cohort of Australian children at school entry. *J Dev Behav Pediatr* 2012;33(4):319-27.
- 45 39. Boyle GJ. Does item homogeneity indicate internal consistency or item redundancy in psychometric
- 46 scales? *Personality and individual differences* 1991;12(3):291-94.
- 47 40. Guhn M, Janus M, Enns J, et al. Examining the social determinants of children's developmental
- 48 health: protocol for building a pan-Canadian population-based monitoring system for early
- 49 childhood development. *BMJ open* 2016;6(4):e012020.
- 50 41. SAS University Edition [program]. Cary, NC: SAS Institute, 2017.
- 51
- 52
- 53
- 54
- 55
- 56
- 57
- 58
- 59
- 60

- 1
- 2
- 3
- 4 42. Schunck R. Cluster Size and Aggregated Level 2 Variables in Multilevel Models. A Cautionary Note. *mda* 2016;10(1):97-108.
- 5
- 6 43. Kim Y, Choi Y-K, Emery S. Logistic regression with multiple random effects: a simulation study of estimation methods and statistical packages. *Am Stat* 2013;67(3):171-82.
- 7
- 8 44. Nelson BB, Dudovitz RN, Coker TR, et al. Predictors of poor school readiness in children without developmental delay at age 2. *Pediatrics* 2016:e20154477.
- 9
- 10 45. Hsu H-C, Wickrama KA. Linking family economic hardship to early childhood health: An investigation of mediating pathways. *Matern Child Health J* 2015;19(12):2636-45.
- 11
- 12 46. Larson K, Russ SA, Nelson BB, et al. Cognitive ability at kindergarten entry and socioeconomic status. *Pediatrics* 2015;135(2):e440-e48.
- 13
- 14 47. Shah R, Sobotka SA, Chen Y-F, et al. Positive parenting practices, health disparities, and developmental progress. *Pediatrics* 2015:peds. 2014-3390.
- 15
- 16 48. Forer B, Minh A, Enns J, et al. A Canadian Neighbourhood Index for Socioeconomic Status Associated with Early Child Development. *Child Indic Res* 2019:1-22.
- 17
- 18 49. King G, McDougall J, DeWit D, et al. Pathways to children's academic performance and prosocial behaviour: Roles of physical health status, environmental, family, and child factors. *Intl J Disabil Dev Educ* 2005;52(4):313-44.
- 19
- 20 50. Emerson E, Hatton C, MacLean J, William E. Contribution of socioeconomic position to health inequalities of British children and adolescents with intellectual disabilities. *Am J Ment Retard* 2007;112(2):140-50.
- 21
- 22 51. Hauser-Cram P, Durand TM, Warfield ME. Early feelings about school and later academic outcomes of children with special needs living in poverty. *Early Child Res Q* 2007;22(2):161-72.
- 23
- 24 52. Irwin LG, Siddiqi A, Hertzman C. Early child development: A powerful equalizer. *Final report to the WHO Commission on social determinants of health, Geneva 2007*
- 25
- 26 53. Stein R, Jessop DJ. A noncategorical approach to chronic childhood illness. *Public Health Rep* 1982;97(4):354.
- 27
- 28 54. McDowell M, O'Keefe M. Public services for children with special needs: discrimination by diagnosis? *J Paediatr Child Health* 2012;48(1):2-5.
- 29
- 30 55. Rosenbaum P, Gorter J. The 'F-words' in childhood disability: I swear this is how we should think! *Child Care Health Dev* 2012;38(4):457-63.
- 31
- 32 56. Anderson L, Larson S, Lakin C, et al. Children with disabilities: social roles and family impacts in the NHIS-D. *DD data brief* 2002;4(1):1-12.
- 33
- 34 57. Hayes SA, Watson SL. The impact of parenting stress: A meta-analysis of studies comparing the experience of parenting stress in parents of children with and without autism spectrum disorder. *J Autism Dev Disord* 2013;43(3):629-42.
- 35
- 36 58. Kunz J, Page ME, Solon G. Are point-in-time measures of neighborhood characteristics useful proxies for children's long-run neighborhood environment? *Econ Lett* 2003;79(2):231-37.
- 37
- 38 59. Jutte DP, Brownell M, Roos NP, et al. Rethinking what is important: biologic versus social predictors of childhood health and educational outcomes. *Epidemiology* 2010;21(3):314-23.
- 39
- 40 60. Garg A, Butz AM, Dworkin PH, et al. Screening for basic social needs at a medical home for low-income children. *Clin Pediatr (Phila)* 2009;48(1):32-36.
- 41
- 42 61. Leitman R, Cooner E, Risher P. NOD/Harris Survey of Americans with Disabilities: Louis Harris and Associates 1994.
- 43
- 44 62. Kamerman SB, Neuman M, Waldfogel J, et al. Social policies, family types and child outcomes in selected OECD countries. *OECD* 2003
- 45
- 46 63. Underwood K. Mapping the early intervention system in Ontario, Canada. *International Journal of Special Education* 2012;27(2):126-35.
- 47
- 48
- 49
- 50
- 51
- 52
- 53
- 54
- 55
- 56
- 57
- 58
- 59
- 60

- 1  
2  
3 64. Graham K, Underwood K. The reality of rurality: Rural parents' experiences of early years services.  
4 *Health & Place* 2012;18(6):1231-39.  
5 65. Underwood K, Frankel E, Parekh G, et al. Transitioning Work of Families: Understanding Trans-  
6 institutional Power in Early Childhood Programs and Services. *Exceptionality Education*  
7 *International* 2019;29:135-53.  
8 66. Wyngaarden Krauss M, Wells N, Gulley S, et al. Navigating systems of care: Results from a national  
9 survey of families of children with special health care needs. *Children's Services: Social Policy,*  
10 *Research, and Practice* 2001;4(4):165-87.  
11  
12  
13  
14  
15  
16  
17  
18  
19  
20  
21  
22  
23  
24  
25  
26  
27  
28  
29  
30  
31  
32  
33  
34  
35  
36  
37  
38  
39  
40  
41  
42  
43  
44  
45  
46  
47  
48  
49  
50  
51  
52  
53  
54  
55  
56  
57  
58  
59  
60

For peer review only

**Table 1: Population characteristics**

| <b>Sex</b>                         | <b>N (% of population of children with disabilities)</b> |
|------------------------------------|----------------------------------------------------------|
| Female                             | 8906 (30.2)                                              |
| Male                               | 20585 (69.7)                                             |
| Missing                            | 29 (0.1)                                                 |
| <b>Age</b>                         |                                                          |
| Mean (SD)                          | 5.79 (0.41)                                              |
| Missing                            | 114 (0.39)                                               |
| <b>EFSL Status</b>                 |                                                          |
| <b>N (%)</b>                       |                                                          |
| Yes                                | 3637 (12.3)                                              |
| No                                 | 25402 (86.0)                                             |
| Missing                            | 481 (1.6)                                                |
| <b>Province</b>                    |                                                          |
| <b>N (%)</b>                       |                                                          |
| Alberta                            | 2099 (7.1)                                               |
| British Columbia                   | 5044 (17.1)                                              |
| Manitoba                           | 2468 (8.4)                                               |
| New Brunswick                      | 327 (1.1)                                                |
| Newfoundland                       | 641 (2.2)                                                |
| Nova Scotia                        | 1083 (3.7)                                               |
| Northwest Territories              | 65 (0.2)                                                 |
| Ontario                            | 13198 (44.7)                                             |
| Prince Edward Island               | 29 (0.1)                                                 |
| Quebec                             | 3023 (10.2)                                              |
| Saskatchewan                       | 1440 (4.9)                                               |
| Yukon                              | 103 (0.3)                                                |
| <b>Year of data collection</b>     |                                                          |
| <b>N (%)</b>                       |                                                          |
| 2004                               | 474 (1.6)                                                |
| 2005                               | 2332 (7.9)                                               |
| 2006                               | 4304 (14.6)                                              |
| 2007                               | 1471 (5.0)                                               |
| 2008                               | 1762 (6.0)                                               |
| 2009                               | 4786 (16.2)                                              |
| 2010                               | 2658 (9.0)                                               |
| 2011                               | 3494 (11.8)                                              |
| 2012                               | 5140 (17.4)                                              |
| 2013                               | 2711 (9.2)                                               |
| 2014                               | 388 (1.3)                                                |
| <b>Mean (SD) EDI domain scores</b> |                                                          |
| PHWB                               | 7.02 (2.12)                                              |
| SC                                 | 5.71 (2.63)                                              |
| EM                                 | 6.13 (1.99)                                              |
| LCD                                | 6.18 (3.01)                                              |
| CSGK                               | 4.37 (3.27)                                              |

PHWB=Physical health & wellbeing; SC=Social competence; EM=Emotional maturity; LCD=Language & cognitive development; CSGK=communication skills & general knowledge

**Table 2: Neighborhood characteristics (N=2016)**

| <b>Province</b>                                                               | <b>Number of neighborhoods (%)</b> |
|-------------------------------------------------------------------------------|------------------------------------|
| Alberta                                                                       | 259 (12.8)                         |
| British Columbia                                                              | 298 (14.7)                         |
| Manitoba                                                                      | 75 (3.7)                           |
| New Brunswick                                                                 | 48 (2.4)                           |
| Newfoundland                                                                  | 41 (2.0)                           |
| Nova Scotia                                                                   | 57 (2.8)                           |
| Northwest Territories                                                         | 3 (0.1)                            |
| Ontario                                                                       | 795 (39.4)                         |
| Prince Edward Island                                                          | 6 (0.3)                            |
| Quebec                                                                        | 373 (18.5)                         |
| Saskatchewan                                                                  | 55 (2.7)                           |
| Yukon                                                                         | 6 (0.3)                            |
| <b>Median (IQR) number of children with disabilities in each neighborhood</b> | 11 (6 – 19)                        |
| <b>Median (IQR) number of children in each neighborhood</b>                   | 128 (87 – 194)                     |

**Table 3: Final Hierarchical Generalized Linear Models (HGLMs) for the Early Development Instrument (EDI)**

| Variables          | Physical health & wellbeing (PHWB) | Social competence (SC)        | Emotional maturity (EM)       | Language & cognitive development (LCD) | Communication skills & general knowledge (CSGK) |
|--------------------|------------------------------------|-------------------------------|-------------------------------|----------------------------------------|-------------------------------------------------|
|                    | $\beta$ coefficient (95% CIs)      | $\beta$ coefficient (95% CIs) | $\beta$ coefficient (95% CIs) | $\beta$ coefficient (95% CIs)          | $\beta$ coefficient (95% CIs)                   |
| Age                | -0.04 (-0.01 to 0.03)              | -0.13 (-0.22 to -0.05)        | -0.08 (-0.14 to -0.02)        | 0.10 (0.01 to 0.18)                    | -0.13 (-0.24 to -0.02)                          |
| Sex (M=0; F=1)     | 0.14 (0.08 to 0.19)                | 0.76 (0.69 to 0.83)           | 0.81 (0.76 to 0.86)           | 0.13 (0.05 to 0.21)                    | 0.43 (0.33 to 0.53)                             |
| EFSL (no=0; yes=1) | 0.04 (-0.04 to 0.12)               | -0.10 (-0.20 to 0.01)         | 0.12 (0.05 to 0.20)           | -0.43 (-0.56 to -0.31)                 | -1.11 (-0.94 to -1.27)                          |
| SES z-score        | 0.17 (0.14 to 0.20)                | 0.17 (0.13 to 0.21)           | 0.12 (0.09 to 0.15)           | 0.29 (0.24 to 0.33)                    | 0.19 (0.14 to 0.24)                             |

95% CIs=95% confidence intervals; EFSL=English/French as a second language; SES=socioeconomic status

Note that coefficient presented in this table reflect the directionality of the association between variables and untransformed EDI scores.

**Table S1: Variables included in the Canadian Neighbourhoods and Early Child Development (CanNECD) socioeconomic status (SES) index**

|                              |                                                                                    |
|------------------------------|------------------------------------------------------------------------------------|
| <b>Education</b>             | % with no high school diploma                                                      |
| <b>Language/Immigration</b>  | % not speaking either official language at home                                    |
| <b>Marital Status</b>        | % separated or divorced                                                            |
| <b>Wealth</b>                | % with investment income, families with children under 6                           |
| <b>High Income</b>           | % with incomes $\geq$ twice than provincial median, families with children under 6 |
| <b>Dues</b>                  | % with union/association dues, families with children under 6                      |
| <b>Social Capital</b>        | % with charitable donations, families with children under 6                        |
| <b>Poverty</b>               | % with low income, lone parent families with children under 6                      |
| <b>Residential Stability</b> | % non-migrant movers in the past year                                              |
| <b>Income Inequality</b>     | Gini Coefficient, lone female families with children under 6                       |

**Table S2: Descriptive characteristics of neighborhoods excluded from analysis (n=40)**

| <b>Province</b>                                              | <b>Number of neighborhoods (%)</b> |
|--------------------------------------------------------------|------------------------------------|
| <b>Alberta</b>                                               | 8 (20)                             |
| <b>New Brunswick</b>                                         | 4 (10)                             |
| <b>Ontario</b>                                               | 5 (12.5)                           |
| <b>Quebec</b>                                                | 23 (57.5)                          |
| <b>Median (IQR) number of children in each neighbourhood</b> | 83 (56-141)                        |
| <b>Mean (SD) of standardized SES index</b>                   | 0.38 (0.88)                        |



**Table S3: Descriptive characteristics of population of children with missing Physical Health & Wellbeing (PHWB) scores (n=446)**

|                                    | PHWB         | SC          | EM          | LCD         | CSGK        |
|------------------------------------|--------------|-------------|-------------|-------------|-------------|
| <b>Sex</b>                         | <b>N (%)</b> |             |             |             |             |
| Female                             | 123 (27.6)   | 138 (30.5)  | 166 (27.7)  | 154 (28.4)  | 128 (30.4)  |
| Male                               | 318 (71.3)   | 311 (68.7)  | 429 (71.5)  | 384 (70.8)  | 289 (68.6)  |
| Missing                            | 5 (1.1)      | 4 (0.9)     | 5 (0.8)     | 4 (0.7)     | 4 (1.0)     |
| <b>Age</b>                         |              |             |             |             |             |
| Mean (SD)                          | 5.78 (0.40)  | 5.73 (0.4)  | 5.78 (0.4)  | 5.76 (0.4)  | 5.76 (0.41) |
| Missing                            | 7 (1.57)     | 6 (1.3)     | 8 (1.3)     | 6 (1.1)     | 7 (1.66)    |
| <b>EFSL Status</b>                 | <b>N (%)</b> |             |             |             |             |
| Yes                                | 61 (13.7)    | 61 (13.5)   | 76 (12.7)   | 77 (14.2)   | 59 (14.0)   |
| No                                 | 379 (85.0)   | 386 (85.2)  | 511 (85.2)  | 457 (84.3)  | 355 (84.3)  |
| Missing                            | 6 (1.3)      | 6 (1.3)     | 13 (2.2)    | 8 (1.5)     | 7 (1.7)     |
| <b>Province</b>                    | <b>N (%)</b> |             |             |             |             |
| Alberta                            | 82 (18.4)    | 84 (18.5)   | 92 (15.3)   | 91 (16.8)   | 85 (20.2)   |
| British Columbia                   | 9 (2.0)      | 17 (3.8)    | 41 (6.8)    | 45 (8.3)    | 7 (1.7)     |
| Manitoba                           | 122 (27.4)   | 117 (25.8)  | 131 (21.8)  | 121 (22.3)  | 113 (26.8)  |
| New Brunswick                      | 1 (0.2)      | 1 (0.2)     | 4 (0.7)     | 1 (0.2)     | 0 (0)       |
| Newfoundland                       | 3 (0.7)      | 6 (1.3)     | 6 (1.0)     | 3 (0.6)     | 5 (1.2)     |
| Nova Scotia                        | 15 (3.4)     | 14 (3.1)    | 20 (3.3)    | 21 (3.9)    | 15 (3.6)    |
| Northwest Territories              | 1 (0.2)      | 1 (0.2)     | 2 (0.3)     | 1 (0.2)     | 1 (0.2)     |
| Ontario                            | 193 (43.3)   | 192 (42.4)  | 241 (40.2)  | 222 (41.0)  | 173 (41.1)  |
| Prince Edward Island               | 0 (0)        | 0 (0)       | 0 (0)       | 1 (0.2)     | 0 (0)       |
| Quebec                             | 5 (1.1)      | 3 (0.7)     | 33 (5.5)    | 15 (2.8)    | 7 (1.7)     |
| Saskatchewan                       | 8 (1.8)      | 13 (2.9)    | 19 (3.2)    | 14 (2.6)    | 10 (2.4)    |
| Yukon                              | 0 (0)        | 0 (0)       | 0 (0)       | 0 (0)       | 0 (0)       |
| <b>Year of data collection</b>     | <b>N (%)</b> |             |             |             |             |
| 2004                               | 3 (0.7)      | 3 (0.7)     | 7 (1.2)     | 3 (0.6)     | 2 (0.5)     |
| 2005                               | 19 (4.3)     | 17 (3.8)    | 29 (4.8)    | 21 (3.9)    | 12 (2.9)    |
| 2006                               | 46 (10.3)    | 44 (9.7)    | 77 (12.8)   | 61 (11.3)   | 46 (10.9)   |
| 2007                               | 26 (5.8)     | 23 (5.1)    | 39 (6.5)    | 32 (5.9)    | 21 (5.0)    |
| 2008                               | 33 (7.4)     | 34 (7.5)    | 43 (7.2)    | 39 (7.2)    | 32 (7.6)    |
| 2009                               | 50 (11.2)    | 55 (12.1)   | 70 (11.7)   | 69 (12.7)   | 43 (10.2)   |
| 2010                               | 51 (11.4)    | 48 (10.6)   | 57 (9.5)    | 58 (10.7)   | 43 (10.2)   |
| 2011                               | 96 (21.5)    | 96 (21.2)   | 113 (18.8)  | 113 (20.8)  | 97 (23.0)   |
| 2012                               | 51 (11.4)    | 56 (12.4)   | 80 (13.3)   | 67 (12.4)   | 53 (12.6)   |
| 2013                               | 71 (15.9)    | 74 (16.3)   | 84 (14.0)   | 79 (14.6)   | 72 (17.1)   |
| 2014                               | 0 (0)        | 3 (0.7)     | 1 (0.2)     | 0 (0)       | 0 (0)       |
| <b>Mean (SD) EDI domain scores</b> |              |             |             |             |             |
| PHWB                               | NA           | 5.06 (2.17) | 6.70 (2.33) | 6.82 (2.09) | 7.71 (1.96) |
| SC                                 | 5.42 (2.97)  | NA          | 5.47 (2.54) | 4.78 (2.33) | 5.97 (2.98) |
| EM                                 | 5.90 (2.53)  | 5.42 (1.44) | NA          | 5.65 (1.89) | 6.31 (1.36) |
| LCD                                | 5.39 (3.31)  | 1.98 (2.38) | 5.51 (3.15) | NA          | 6.29 (3.46) |
| CSGK                               | 3.80 (3.34)  | 0.86 (1.91) | 3.77 (3.06) | 2.93 (2.74) | NA          |

PHWB=Physical health & wellbeing; SC=Social competence; EM=Emotional maturity; LCD=Language & cognitive development; CSGK=communication skills & general knowledge

**Table S4: Hierarchical Generalized Linear Model (HGLM) for the Physical Health & Wellbeing (PHWB) main of the Early Development Instrument (EDI)**

| Parameter              | Model 1            |             |         |         | Model 2            |             |           |         | Model 3            |             |           |         |
|------------------------|--------------------|-------------|---------|---------|--------------------|-------------|-----------|---------|--------------------|-------------|-----------|---------|
|                        | B coefficient (SE) | F-statistic | DF      | P-value | B coefficient (SE) | F-statistic | DF        | P-value | B coefficient (SE) | F-statistic | DF        | P-value |
| Intercept              | 3.98 (0.02)        | 47093.34    | 1, 2013 | <0.0001 | 4.75 (1.07)        | 19.80       | 1, 2002   | <0.0001 | 4.65 (1.07)        | 19.10       | 1, 2002   | <0.0001 |
| Year (categorical)     |                    |             |         |         |                    | 3.95        | 10, 26117 | <0.0001 |                    | 4.18        | 10, 26116 | <0.0001 |
| Province (categorical) |                    |             |         |         |                    | 13.94       | 11, 26117 | <0.0001 |                    | 13.54       | 11, 26116 | <0.0001 |
| Year*Province          |                    |             |         |         |                    | 2.54        | 53, 26117 | <0.0001 |                    | 2.91        | 53, 26116 | <0.0001 |
| Age                    |                    |             |         |         | 0.03 (0.03)        | 1.04        | 1, 26117  | 0.3089  | 0.04 (0.03)        | 1.29        | 1, 26116  | 0.2558  |
| Sex (M=0; F=1)         |                    |             |         |         | -0.13 (0.03)       | 22.96       | 1, 26117  | <0.0001 | -0.14 (0.03)       | 24.11       | 1, 26116  | <0.0001 |
| EFSL (no=0; yes=1)     |                    |             |         |         | -0.02 (0.04)       | 0.19        | 1, 26117  | 0.6638  | -0.04 (0.04)       | 0.94        | 1, 26116  | 0.3325  |
| SES z-score            |                    |             |         |         |                    |             |           |         | -0.17 (0.02)       | 116.76      | 1, 26116  | <0.0001 |
| Deviance               | 118982.4           |             |         |         | 118334.9           |             |           |         | 118222.1           |             |           |         |
| AIC                    | 118988.4           |             |         |         | 118494.9           |             |           |         | 118384.1           |             |           |         |
| BIC                    | 119005.2           |             |         |         | 118943.5           |             |           |         | 118838.4           |             |           |         |
| Pearson Chi-Square     | 7394.78            |             |         |         | 7475.81            |             |           |         | 7495.20            |             |           |         |

Note the sign (+/-) of correlation coefficients reflects direction of correlation with transformed EDI domain scores (11 – EDI domain scores).  
 DF=degrees of freedom; EFSL=English/French as a second language AIC=Akaike Information Criterion; BIC-Bayesian Information Criterion

**Table S5: Hierarchical Generalized Linear Model (HGLM) for the Social Competence (SC) Domain of the Early Development Instrument (EDI)**

| Parameter              | Model 1            |             |         |         | Model 2            |             |           |         | Model 3            |             |           |         |
|------------------------|--------------------|-------------|---------|---------|--------------------|-------------|-----------|---------|--------------------|-------------|-----------|---------|
|                        | B coefficient (SE) | F-statistic | Df      | P-value | B coefficient (SE) | F-statistic | Df        | P-value | B coefficient (SE) | F-statistic | Df        | P-value |
| Intercept              | 5.31 (0.02)        | 62975.90    | 1, 2014 | <0.0001 | 4.62 (1.26)        | 13.47       | 1, 2004   | 0.0003  | 4.46 (1.25)        | 12.67       | 1, 2003   | 0.0004  |
| Year (categorical)     |                    |             |         |         |                    | 2.83        | 10, 26106 | 0.0016  |                    | 2.56        | 10, 26106 | 0.0043  |
| Province (categorical) |                    |             |         |         |                    | 10.27       | 11, 26106 | <0.0001 |                    | 10.25       | 11, 26106 | <0.0001 |
| Year*Province          |                    |             |         |         |                    | 2.76        | 53, 26106 | <0.0001 |                    | 2.76        | 53, 26106 | <0.0001 |
| Age                    |                    |             |         |         | 0.13 (0.04)        | 8.99        | 1, 26106  | 0.0027  | 0.13 (0.04)        | 10.12       | 1, 26106  | 0.0015  |
| Sex (M=0; F=1)         |                    |             |         |         | -0.75 (0.04)       | 439.63      | 1, 26106  | <0.0001 | -0.76 (0.04)       | 447.29      | 1, 26106  | <0.0001 |
| EFSL (no=0; yes=1)     |                    |             |         |         | 0.12 (0.06)        | 4.82        | 1, 26106  | 0.0284  | 0.10 (0.05)        | 3.07        | 1, 26106  | 0.0798  |
| SES z-score            |                    |             |         |         |                    |             |           |         | -0.17 (0.02)       | 69.10       | 1, 26106  | <0.0001 |
| Deviance               | 134806.2           |             |         |         | 134020.8           |             |           |         | 133955.4           |             |           |         |
| AIC                    | 134812.2           |             |         |         | 134180.8           |             |           |         | 134117.4           |             |           |         |
| BIC                    | 134829.0           |             |         |         | 134629.5           |             |           |         | 134571.7           |             |           |         |
| Pearson Chi-Square     | 6654.52            |             |         |         | 6723.87            |             |           |         | 6736.70            |             |           |         |

Note the sign (+/-) of correlation coefficients reflects direction of correlation with transformed EDI domain scores (11 – EDI domain scores).

DF=degrees of freedom; EFSL=English/French as a second language AIC=Akaike Information Criterion; BIC-Bayesian Information Criterion

**Table S6: Hierarchical Generalized Linear Model (HGLM) for the Emotional Maturity (EM) Domain of the Early Development Instrument (EDI)**

| Parameter              | Model 1            |             |         |         | Model 2            |             |           |         | Model 3            |             |           |         |
|------------------------|--------------------|-------------|---------|---------|--------------------|-------------|-----------|---------|--------------------|-------------|-----------|---------|
|                        | B coefficient (SE) | F-statistic | Df      | P-value | B coefficient (SE) | F-statistic | Df        | P-value | B coefficient (SE) | F-statistic | Df        | P-value |
| Intercept              | 4.88 (0.02)        | 47093.34    | 1, 2014 | <0.0001 | 4.28 (0.96)        | 19.71       | 1, 2003   | <0.0001 | 4.18 (0.95)        | 19.00       | 1, 2003   | <0.0001 |
| Year (categorical)     |                    |             |         |         |                    | 2.68        | 10, 25974 | 0.0029  |                    | 2.42        | 10, 25793 | <0.0001 |
| Province (categorical) |                    |             |         |         |                    | 9.22        | 11, 25974 | <0.0001 |                    | 9.04        | 11, 25793 | <0.0001 |
| Year*Province          |                    |             |         |         |                    | 2.12        | 53, 25974 | <0.0001 |                    | 2.06        | 53, 25793 | <0.0001 |
| Age                    |                    |             |         |         | 0.08 (0.03)        | 6.17        | 1, 25974  | 0.0130  | 0.08 (0.03)        | 6.63        | 1, 25793  | 0.0101  |
| Sex (M=0; F=1)         |                    |             |         |         | -0.81 (0.03)       | 970.94      | 1, 25974  | <0.0001 | -0.81 (0.03)       | 969.06      | 1, 25793  | <0.0001 |
| EFSL (no=0; yes=1)     |                    |             |         |         | -0.11 (0.04)       | 7.29        | 1, 25974  | 0.0070  | -0.12 (0.04)       | 10.01       | 1, 25793  | 0.0016  |
| SES z-score            |                    |             |         |         |                    |             |           |         | -0.12 (0.01)       | 65.82       | 1, 25793  | <0.0001 |
| Deviance               | 119448.7           |             |         |         | 118202.7           |             |           |         | 118136.1           |             |           |         |
| AIC                    | 119454.7           |             |         |         | 118362.7           |             |           |         | 118298.1           |             |           |         |
| BIC                    | 119471.6           |             |         |         | 118811.3           |             |           |         | 118752.3           |             |           |         |
| Pearson Chi-Square     | 4465.48            |             |         |         | 4421.32            |             |           |         | 4428.30            |             |           |         |

Note the sign (+/-) of correlation coefficients reflects direction of correlation with transformed EDI domain scores (11 – EDI domain scores).  
 DF=degrees of freedom; EFSL=English/French as a second language AIC=Akaike Information Criterion; BIC-Bayesian Information Criterion

**Table S7: Hierarchical Generalized Linear Model (HGLM) for the Language & Cognitive Development (LCD) Domain of the Early Development Instrument (EDI)**

| Parameter              | Model 1            |             |         |         | Model 2            |             |           |         | Model 3            |             |           |         |
|------------------------|--------------------|-------------|---------|---------|--------------------|-------------|-----------|---------|--------------------|-------------|-----------|---------|
|                        | B coefficient (SE) | F-statistic | Df      | P-value | B coefficient (SE) | F-statistic | Df        | P-value | B coefficient (SE) | F-statistic | Df        | P-value |
| Intercept              | 4.82 (0.02)        | 37229.70    | 1, 2014 | <0.0001 | 4.36 (1.33)        | 10.69       | 1, 2003   | 0.0011  | 4.17 (1.33)        | 9.80        | 1, 2003   | 0.0017  |
| Year (categorical)     |                    |             |         |         |                    | 3.78        | 10, 26022 | 0.0029  |                    | 3.49        | 10, 26021 | <0.0001 |
| Province (categorical) |                    |             |         |         |                    | 6.32        | 11, 26022 | <0.0001 |                    | 7.01        | 11, 26021 | <0.0001 |
| Year*Province          |                    |             |         |         |                    | 2.13        | 53, 26022 | <0.0001 |                    | 2.28        | 53, 26021 | <0.0001 |
| Age                    |                    |             |         |         | -0.11 (0.04)       | 6.34        | 1, 26022  | 0.0118  | -0.10 (0.04)       | 5.01        | 1, 26021  | 0.0252  |
| Sex (M=0; F=1)         |                    |             |         |         | -0.13 (0.04)       | 10.35       | 1, 26022  | 0.0013  | -0.13 (0.04)       | 10.42       | 1, 26021  | 0.0013  |
| EFSL (no=0; yes=1)     |                    |             |         |         | 0.48 (0.06)        | 58.32       | 1, 26022  | <0.0001 | 0.43 (0.06)        | 47.13       | 1, 26021  | <0.0001 |
| SES z-score            |                    |             |         |         |                    |             |           |         | -0.29 (0.02)       | 160.80      | 1, 26021  | <0.0001 |
| Deviance               | 135595.0           |             |         |         | 135045.0           |             |           |         | 134891.0           |             |           |         |
| AIC                    | 135601.0           |             |         |         | 135205.0           |             |           |         | 135053.0           |             |           |         |
| BIC                    | 135617.8           |             |         |         | 135653.7           |             |           |         | 135507.3           |             |           |         |
| Pearson Chi-Square     | 10372.47           |             |         |         | 10458.52           |             |           |         | 10531.822          |             |           |         |

Note the sign (+/-) of correlation coefficients reflects direction of correlation with transformed EDI domain scores (11 – EDI domain scores).

DF=degrees of freedom; EFSL=English/French as a second language AIC=Akaike Information Criterion; BIC-Bayesian Information Criterion

**Table S8: Hierarchical Generalized Linear Model (HGLM) for the Communication Skills & General Knowledge (CSGK) Domain of the Early Development Instrument (EDI)**

| Parameter              | Model 1            |             |         |         | Model 2            |             |           |         | Model 3            |             |           |         |
|------------------------|--------------------|-------------|---------|---------|--------------------|-------------|-----------|---------|--------------------|-------------|-----------|---------|
|                        | B coefficient (SE) | F-statistic | Df      | P-value | B coefficient (SE) | F-statistic | Df        | P-value | B coefficient (SE) | F-statistic | Df        | P-value |
| Intercept              | 6.65 (0.03)        | 63312.62    | 1, 2014 | <0.0001 | 6.11 (1.78)        | 11.76       | 1, 2003   | 0.0006  | 4.65 (1.07)        | 19.10       | 1, 2002   | 0.0007  |
| Year (categorical)     |                    |             |         |         |                    | 3.95        | 10, 26141 | 0.0247  |                    | 1.74        | 10, 26140 | 0.0657  |
| Province (categorical) |                    |             |         |         |                    | 13.94       | 11, 26141 | <0.0001 |                    | 5.94        | 11, 26140 | <0.0001 |
| Year*Province          |                    |             |         |         |                    | 2.54        | 53, 26141 | 0.0109  |                    | 1.51        | 53, 26140 | 0.0094  |
| Age                    |                    |             |         |         | 0.13 (0.06)        | 2.05        | 1, 26141  | 0.0258  | 0.13 (0.05)        | 5.19        | 1, 26140  | 0.0227  |
| Sex (M=0; F=1)         |                    |             |         |         | -0.42 (0.05)       | 7.24        | 1, 26141  | <0.0001 | -0.43 (0.05)       | 70.12       | 1, 26140  | <0.0001 |
| EFSL (no=0; yes=1)     |                    |             |         |         | 1.15 (0.08)        | 1.50        | 1, 26141  | <0.0001 | 1.11 (0.08)        | 173.86      | 1, 26140  | <0.0001 |
| SES z-score            |                    |             |         |         |                    |             |           |         | -0.19 (0.02)       | 55.05       | 1, 26140  | <0.0001 |
| Deviance               | 151991.9           |             |         |         | 151438.8           |             |           |         | 151384.1           |             |           |         |
| AIC                    | 151997.9           |             |         |         | 151598.8           |             |           |         | 151544.1           |             |           |         |
| BIC                    | 152014.7           |             |         |         | 152047.5           |             |           |         | 151992.8           |             |           |         |
| Pearson Chi-Square     | 6272.57            |             |         |         | 6810.50            |             |           |         | 6817.77            |             |           |         |

Note the sign (+/-) of correlation coefficients reflects direction of correlation with transformed EDI domain scores (11 – EDI domain scores).

DF=degrees of freedom; EFSL=English/French as a second language AIC=Akaike Information Criterion; BIC-Bayesian Information Criterion

**Table S9: Goodness-of-fit of different distributions and link functions for the social competence domain**

| Domain                                          | Goodness-of-fit statistics | Identity link |          |          | Log link    |          |          |
|-------------------------------------------------|----------------------------|---------------|----------|----------|-------------|----------|----------|
|                                                 |                            | Exponential   | Gamma    | Normal   | Exponential | Gamma    | Normal   |
| Physical health & wellbeing (PHWB)              | AIC                        | 134241.6      | 118384.1 | 121141.6 | 134240.4    | 118399.9 | 121147.4 |
|                                                 | BIC                        | 134684.7      | 118838.4 | 121595.8 | 134683.5    | 118854.2 | 121601.6 |
| Social competence (SC)                          | AIC                        | 150247.6      | 113417.4 | 133234.4 | 150247.5    | 134128.9 | NC       |
|                                                 | BIC                        | 150690.7      | 134571.7 | 133688.7 | 150690.6    | 134583.2 | NC       |
| Emotional maturity (EM)                         | AIC                        | 144859.5      | 118298.1 | 116476.9 | 144859.8    | 118310   | NC       |
|                                                 | BIC                        | 145302.6      | 118752.3 | 116931.2 | 145302.8    | 118764.3 | NC       |
| Language & cognitive development (LCD)          | AIC                        | 144457.3      | 135053.0 | 140742   | 144457.1    | 135069.7 | 140754.4 |
|                                                 | BIC                        | 144900.3      | 135507.3 | 141196.3 | 144900.2    | 135524   | 141208.7 |
| Communication skills & general knowledge (CSGK) | AIC                        | 163276.5      | 151544.1 | 146002.4 | 163274.7    | 151539.4 | NC       |
|                                                 | BIC                        | 163719.5      | 151992.8 | 146456.7 | 163717.8    | 151988.1 | NC       |

AIC=Akaike information criterion; BIC=Bayesian information criterion; NC=not converged

**Table S10: Hierarchical Generalized Linear Model (HGLM) for the Physical Health & Wellbeing (PHWB) Domain of the Early Development Instrument (EDI) excluding outlying and influential cases (n = 687 excluded)**

|                               | <b>B coefficient (SE)</b> | <b>F-statistic</b> | <b>Df</b> | <b>P-value</b> |
|-------------------------------|---------------------------|--------------------|-----------|----------------|
| <b>Intercept</b>              | 4.70 (1.03)               | 20.70              | 1, 1999   | <0.0001        |
| <b>Year (categorical)</b>     |                           | 6.03               | 10, 25432 | <0.0001        |
| <b>Province (categorical)</b> |                           | 19.14              | 11, 25432 | <0.0001        |
| <b>Year*Province</b>          |                           | 4.14               | 53, 25432 | <0.0001        |
| <b>Age</b>                    | 0.02 (0.03)               | 0.63               | 1, 25432  | 0.4265         |
| <b>Sex (M=0; F=1)</b>         | -0.21 (0.03)              | 60.10              | 1, 25432  | <0.0001        |
| <b>EFSL (no=0; yes=1)</b>     | -0.09 (0.04)              | 5.07               | 1, 25432  | 0.0243         |
| <b>SES z-score</b>            | -0.19 (0.02)              | 4.14               | 1, 25432  | <0.0001        |

EFSL=English/French as a second language; Df=degrees of freedom



**Table S11: Hierarchical Generalized Linear Model (HGLM) for the Social Competence (SC) Domain of the Early Development Instrument (EDI) excluding outlying and influential cases (n = 317 excluded)**

|                               | <b>B coefficient (SE)</b> | <b>F-statistic</b> | <b>Df</b> | <b>P-value</b> |
|-------------------------------|---------------------------|--------------------|-----------|----------------|
| <b>Intercept</b>              | 4.54 (1.24)               | 13.47              | 1, 2002   | 0.0003         |
| <b>Year (categorical)</b>     |                           | 5.26               | 10, 25790 | <0.0001        |
| <b>Province (categorical)</b> |                           | 14.83              | 11, 25790 | <0.0001        |
| <b>Year*Province</b>          |                           | 4.43               | 53, 25790 | <0.0001        |
| <b>Age</b>                    | 0.13 (0.04)               | 9.48               | 1, 25790  | 0.0021         |
| <b>Sex (M=0; F=1)</b>         | -0.94 (0.03)              | 736.81             | 1, 25790  | <0.0001        |
| <b>EFSL (no=0; yes=1)</b>     | 0.07 (0.05)               | 1.74               | 1, 25790  | 0.1862         |
| <b>SES z-score</b>            | -0.18 (0.02)              | 86.23              | 1, 25790  | <0.0001        |

EFSL=English/French as a second language; Df=degrees of freedom

**Table S12: Hierarchical Generalized Linear Model (HGLM) for the Emotional Maturity (EM) Domain of the Early Development Instrument (EDI) excluding outlying and influential cases (n = 409 excluded)**

|                               | <b>B coefficient (SE)</b> | <b>F-statistic</b> | <b>Df</b> | <b>P-value</b> |
|-------------------------------|---------------------------|--------------------|-----------|----------------|
| <b>Intercept</b>              | 3.36 (0.91)               | 13.54              | 1, 2001   | 0.0002         |
| <b>Year (categorical)</b>     |                           | 3.84               | 10, 25566 | <0.0001        |
| <b>Province (categorical)</b> |                           | 12.32              | 11, 25566 | <0.0001        |
| <b>Year*Province</b>          |                           | 3.04               | 53, 25566 | <0.0001        |
| <b>Age</b>                    | 0.10 (0.03)               | 10.68              | 1, 25566  | 0.0011         |
| <b>Sex (M=0; F=1)</b>         | -0.91 (0.03)              | 1307.36            | 1, 25566  | <0.0001        |
| <b>EFSL (no=0; yes=1)</b>     | -0.13 (0.04)              | 11.97              | 1, 25566  | 0.0005         |
| <b>SES z-score</b>            | -0.14 (0.01)              | 88.74              | 1, 25566  | <0.0001        |

EFSL=English/French as a second language; Df=degrees of freedom

**Table S13: Hierarchical Generalized Linear Model (HGLM) for the Language & Cognitive Development (LCD) Domain of the Early Development Instrument (EDI) excluding outlying and influential cases (n = 619 excluded)**

|                               | <b>B coefficient (SE)</b> | <b>F-statistic</b> | <b>Df</b> | <b>P-value</b> |
|-------------------------------|---------------------------|--------------------|-----------|----------------|
| <b>Intercept</b>              | 3.43 (1.27)               | 12.11              | 1, 2002   | 0.0005         |
| <b>Year (categorical)</b>     |                           | 5.87               | 10, 25403 | <0.0001        |
| <b>Province (categorical)</b> |                           | 13.29              | 11, 25403 | <0.0001        |
| <b>Year*Province</b>          |                           | 4.16               | 53, 25403 | <0.0001        |
| <b>Age</b>                    | -0.20 (0.04)              | 22.42              | 1, 25403  | <0.0001        |
| <b>Sex (M=0; F=1)</b>         | -0.23 (0.04)              | 36.93              | 1, 25403  | <0.0001        |
| <b>EFSL (no=0; yes=1)</b>     | 0.50 (0.06)               | 67.66              | 1, 25403  | <0.0001        |
| <b>SES z-score</b>            | -0.39 (0.02)              | 278.45             | 1, 25403  | <0.0001        |

EFSL=English/French as a second language; Df=degrees of freedom

**Table S14: Hierarchical Generalized Linear Model (HGLM) for the Communication Skills & General Knowledge (CSGK) Domain of the Early Development Instrument (EDI) excluding outlying and influential cases (n = 2 excluded)**

|                               | <b>B coefficient (SE)</b> | <b>F-statistic</b> | <b>Df</b> | <b>P-value</b> |
|-------------------------------|---------------------------|--------------------|-----------|----------------|
| <b>Intercept</b>              | 6.02 (1.78)               | 11.49              | 1, 2002   | 0.0007         |
| <b>Year (categorical)</b>     |                           | 1.81               | 10, 26139 | 0.0527         |
| <b>Province (categorical)</b> |                           | 7.35               | 11, 26139 | <0.0001        |
| <b>Year*Province</b>          |                           | 1.63               | 53, 26139 | 0.0027         |
| <b>Age</b>                    | 0.13 (0.06)               | 5.09               | 1, 26139  | 0.0241         |
| <b>Sex (M=0; F=1)</b>         | -0.43 (0.05)              | 71.08              | 1, 26139  | <0.0001        |
| <b>EFSL (no=0; yes=1)</b>     | 1.11 (0.08)               | 173.83             | 1, 26139  | <0.0001        |
| <b>SES z-score</b>            | -0.19 (0.03)              | 54.80              | 1, 26139  | <0.0001        |

EFSL=English/French as a second language; Df=degrees of freedom

**STROBE 2007 (v4) Statement—Checklist of items that should be included in reports of *cross-sectional studies***

| Section/Topic             | Item # | Recommendation                                                                                                                                                                       | Reported on page #        |
|---------------------------|--------|--------------------------------------------------------------------------------------------------------------------------------------------------------------------------------------|---------------------------|
| <b>Title and abstract</b> | 1      | (a) Indicate the study’s design with a commonly used term in the title or the abstract                                                                                               | 1                         |
|                           |        | (b) Provide in the abstract an informative and balanced summary of what was done and what was found                                                                                  | 2                         |
| <b>Introduction</b>       |        |                                                                                                                                                                                      |                           |
| Background/rationale      | 2      | Explain the scientific background and rationale for the investigation being reported                                                                                                 | 4-5                       |
| Objectives                | 3      | State specific objectives, including any prespecified hypotheses                                                                                                                     | 5                         |
| <b>Methods</b>            |        |                                                                                                                                                                                      |                           |
| Study design              | 4      | Present key elements of study design early in the paper                                                                                                                              | 5                         |
| Setting                   | 5      | Describe the setting, locations, and relevant dates, including periods of recruitment, exposure, follow-up, and data collection                                                      | 5-6                       |
| Participants              | 6      | (a) Give the eligibility criteria, and the sources and methods of selection of participants                                                                                          | 5                         |
| Variables                 | 7      | Clearly define all outcomes, exposures, predictors, potential confounders, and effect modifiers. Give diagnostic criteria, if applicable                                             | 5-6                       |
| Data sources/ measurement | 8*     | For each variable of interest, give sources of data and details of methods of assessment (measurement). Describe comparability of assessment methods if there is more than one group | 5-6                       |
| Bias                      | 9      | Describe any efforts to address potential sources of bias                                                                                                                            | NA                        |
| Study size                | 10     | Explain how the study size was arrived at                                                                                                                                            | NA; population-level data |
| Quantitative variables    | 11     | Explain how quantitative variables were handled in the analyses. If applicable, describe which groupings were chosen and why                                                         | 6-7                       |
| Statistical methods       | 12     | (a) Describe all statistical methods, including those used to control for confounding                                                                                                | 6-7                       |
|                           |        | (b) Describe any methods used to examine subgroups and interactions                                                                                                                  | NA                        |
|                           |        | (c) Explain how missing data were addressed                                                                                                                                          | 7                         |
|                           |        | (d) If applicable, describe analytical methods taking account of sampling strategy                                                                                                   | 6                         |
|                           |        | (e) Describe any sensitivity analyses                                                                                                                                                | 7                         |

| <b>Results</b>   |     |                                                                                                                                                                                                              |                                                                                                                                                                                                                                                                                                               |
|------------------|-----|--------------------------------------------------------------------------------------------------------------------------------------------------------------------------------------------------------------|---------------------------------------------------------------------------------------------------------------------------------------------------------------------------------------------------------------------------------------------------------------------------------------------------------------|
| Participants     | 13* | (a) Report numbers of individuals at each stage of study—eg numbers potentially eligible, examined for eligibility, confirmed eligible, included in the study, completing follow-up, and analysed            | NA; population-level database.                                                                                                                                                                                                                                                                                |
|                  |     | (b) Give reasons for non-participation at each stage                                                                                                                                                         | NA; population-level database.                                                                                                                                                                                                                                                                                |
|                  |     | (c) Consider use of a flow diagram                                                                                                                                                                           | NA                                                                                                                                                                                                                                                                                                            |
| Descriptive data | 14* | (a) Give characteristics of study participants (eg demographic, clinical, social) and information on exposures and potential confounders                                                                     | Tables 1 and 2                                                                                                                                                                                                                                                                                                |
|                  |     | (b) Indicate number of participants with missing data for each variable of interest                                                                                                                          | Table S3                                                                                                                                                                                                                                                                                                      |
| Outcome data     | 15* | Report numbers of outcome events or summary measures                                                                                                                                                         |                                                                                                                                                                                                                                                                                                               |
| Main results     | 16  | (a) Give unadjusted estimates and, if applicable, confounder-adjusted estimates and their precision (eg, 95% confidence interval). Make clear which confounders were adjusted for and why they were included | Table 3<br><br>Although unadjusted estimates are not presented, VIF statistics were very low, indicating that predictor variables were not correlated with one another. When there is little to no correlation between predictor variables, unadjusted and adjusted effect estimates are likely very similar. |
|                  |     | (b) Report category boundaries when continuous variables were categorized                                                                                                                                    | NA                                                                                                                                                                                                                                                                                                            |
|                  |     | (c) If relevant, consider translating estimates of relative risk into absolute risk for a meaningful time period                                                                                             | NA                                                                                                                                                                                                                                                                                                            |
| Other analyses   | 17  | Report other analyses done—eg analyses of subgroups and interactions, and sensitivity analyses                                                                                                               | 9                                                                                                                                                                                                                                                                                                             |

|                          |    |                                                                                                                                                                            |       |
|--------------------------|----|----------------------------------------------------------------------------------------------------------------------------------------------------------------------------|-------|
| <b>Discussion</b>        |    |                                                                                                                                                                            |       |
| Key results              | 18 | Summarise key results with reference to study objectives                                                                                                                   | 9     |
| Limitations              | 19 | Discuss limitations of the study, taking into account sources of potential bias or imprecision. Discuss both direction and magnitude of any potential bias                 | 11-12 |
| Interpretation           | 20 | Give a cautious overall interpretation of results considering objectives, limitations, multiplicity of analyses, results from similar studies, and other relevant evidence | 10-13 |
| Generalisability         | 21 | Discuss the generalisability (external validity) of the study results                                                                                                      | 12-13 |
| <b>Other information</b> |    |                                                                                                                                                                            |       |
| Funding                  | 22 | Give the source of funding and the role of the funders for the present study and, if applicable, for the original study on which the present article is based              | 13    |

\*Give information separately for cases and controls in case-control studies and, if applicable, for exposed and unexposed groups in cohort and cross-sectional studies.

**Note:** An Explanation and Elaboration article discusses each checklist item and gives methodological background and published examples of transparent reporting. The STROBE checklist is best used in conjunction with this article (freely available on the Web sites of PLoS Medicine at <http://www.plosmedicine.org/>, Annals of Internal Medicine at <http://www.annals.org/>, and Epidemiology at <http://www.epidem.com/>). Information on the STROBE Initiative is available at [www.strobe-statement.org](http://www.strobe-statement.org).

# BMJ Open

## The socioeconomic gradient in the developmental health of Canadian children with disabilities at school-entry: a cross-sectional study

|                                 |                                                                                                                                                                                                                                                                                                                                                                                                                                                                                                                                                                                                                                                                                        |
|---------------------------------|----------------------------------------------------------------------------------------------------------------------------------------------------------------------------------------------------------------------------------------------------------------------------------------------------------------------------------------------------------------------------------------------------------------------------------------------------------------------------------------------------------------------------------------------------------------------------------------------------------------------------------------------------------------------------------------|
| Journal:                        | <i>BMJ Open</i>                                                                                                                                                                                                                                                                                                                                                                                                                                                                                                                                                                                                                                                                        |
| Manuscript ID                   | bmjopen-2019-032396.R2                                                                                                                                                                                                                                                                                                                                                                                                                                                                                                                                                                                                                                                                 |
| Article Type:                   | Original research                                                                                                                                                                                                                                                                                                                                                                                                                                                                                                                                                                                                                                                                      |
| Date Submitted by the Author:   | 27-Feb-2020                                                                                                                                                                                                                                                                                                                                                                                                                                                                                                                                                                                                                                                                            |
| Complete List of Authors:       | Zeraatkar, Dena; McMaster University, Health Research Methods, Evidence, and Impact<br>Duku, Eric; McMaster University, Offord Centre for Child Studies<br>Bennett, Teresa ; McMaster University, Offord Centre for Child Studies<br>Guhn, Martin; University of British Columbia, Human Early Learning Partnership, School of Population and Public Health<br>Forer, Barry; University of British Columbia, Human Early Learning Partnership, School of Population and Public Health<br>Brownell, Marni; University of Manitoba, Manitoba Centre for Health Policy, Department of Community Health Sciences<br>Janus, Magdalena; McMaster University, Offord Centre for Child Studies |
| <b>Primary Subject Heading</b>: | Paediatrics                                                                                                                                                                                                                                                                                                                                                                                                                                                                                                                                                                                                                                                                            |
| Secondary Subject Heading:      | Paediatrics, Public health, Health policy, Health services research                                                                                                                                                                                                                                                                                                                                                                                                                                                                                                                                                                                                                    |
| Keywords:                       | Community child health < PAEDIATRICS, SOCIAL MEDICINE, PUBLIC HEALTH, Developmental neurology & neurodisability < PAEDIATRICS                                                                                                                                                                                                                                                                                                                                                                                                                                                                                                                                                          |
|                                 |                                                                                                                                                                                                                                                                                                                                                                                                                                                                                                                                                                                                                                                                                        |

SCHOLARONE™  
Manuscripts





I, the Submitting Author has the right to grant and does grant on behalf of all authors of the Work (as defined in the below author licence), an exclusive licence and/or a non-exclusive licence for contributions from authors who are: i) UK Crown employees; ii) where BMJ has agreed a CC-BY licence shall apply, and/or iii) in accordance with the terms applicable for US Federal Government officers or employees acting as part of their official duties; on a worldwide, perpetual, irrevocable, royalty-free basis to BMJ Publishing Group Ltd ("BMJ") its licensees and where the relevant Journal is co-owned by BMJ to the co-owners of the Journal, to publish the Work in this journal and any other BMJ products and to exploit all rights, as set out in our [licence](#).

The Submitting Author accepts and understands that any supply made under these terms is made by BMJ to the Submitting Author unless you are acting as an employee on behalf of your employer or a postgraduate student of an affiliated institution which is paying any applicable article publishing charge ("APC") for Open Access articles. Where the Submitting Author wishes to make the Work available on an Open Access basis (and intends to pay the relevant APC), the terms of reuse of such Open Access shall be governed by a Creative Commons licence – details of these licences and which [Creative Commons](#) licence will apply to this Work are set out in our licence referred to above.

Other than as permitted in any relevant BMJ Author's Self Archiving Policies, I confirm this Work has not been accepted for publication elsewhere, is not being considered for publication elsewhere and does not duplicate material already published. I confirm all authors consent to publication of this Work and authorise the granting of this licence.

1  
2  
3 **The socioeconomic gradient in the developmental health of Canadian children with disabilities at**  
4 **school-entry: a cross-sectional study**  
5

6 Dena Zeraatkar, *PhD student* Department of Health Research Methods, Evidence, and Impact, McMaster  
7 University  
8

9 Eric Duku, *Assistant professor* Offord Centre for Child Studies, Department of Psychiatry and Behavioural  
10 Neurosciences  
11

12 Teresa Bennett, *Child psychiatrist and assistant professor* Offord Centre for Child Studies, Department of  
13 Psychiatry and Behavioural Neurosciences  
14

15 Martin Guhn, *Assistant professor* Human Early Learning Partnership, School of Population and Public  
16 Health, University of British Columbia, Vancouver, British Columbia, Canada  
17

18 Barry Forer, PhD, *Research methodologist* Human Early Learning Partnership, School of Population and  
19 Public Health, University of British Columbia, Vancouver, British Columbia, Canada  
20

21 Marni Brownell, *Professor* Manitoba Centre for Health Policy, Department of Community Health  
22 Sciences, University of Manitoba, Winnipeg, Manitoba, Canada  
23

24 Magdalena Janus, *Professor* Offord Centre for Child Studies, Department of Psychiatry and Behavioural  
25 Neurosciences  
26

27  
28  
29  
30 Corresponding author:

31 Dr. Magdalena Janus

32 Offord Centre for Child Studies, Department of Psychiatry and Behavioural Neurosciences, McMaster  
33 University

34 1280 Main Street West

35 MIP 201A,

36 Hamilton, ON L8S 4K1, Canada

37 Tel: 905-574-6665 ext. 21418

38 E-mail: janusm@mcmaster.ca  
39  
40  
41  
42  
43

44 Word count: 3,290  
45  
46  
47

48 Keywords: developmental health, neighborhood SES, Early Development Instrument, cross-sectional  
49 study  
50  
51  
52  
53  
54  
55  
56  
57  
58  
59  
60

## Abstract

**Objective:** To examine the relationship between developmental health and neighborhood socioeconomic status (SES) in kindergarten children with disabilities.

**Design:** Cross-sectional study using population-level database of children's developmental health at school entry (2002 – 2014).

**Setting:** 12 of 13 Canadian provinces/territories.

**Measures:** Taxfiler and Census data from 2005 and 2006, respectively, were aggregated according to custom-created neighborhood boundaries and used to create an index of neighborhood-level SES.

Developmental health outcomes were measured for 29,520 children with disabilities using the Early Development Instrument (EDI), a teacher-completed measure of developmental health across five domains.

**Analysis:** Hierarchical generalized linear models were used to test the association between neighborhood-level SES and developmental health.

**Results:** All EDI domains were positively correlated with the neighborhood-level SES index. The strongest association was observed for the language & cognitive development domain ( $\beta$  (SE): 0.29 (0.02)) and the weakest association was observed for the emotional maturity domain ( $\beta$  (SE): 0.12 (0.01)).

**Conclusions:** The magnitude of differences observed in EDI scores across neighborhoods at the 5<sup>th</sup> and 95<sup>th</sup> percentiles are similar to the effects of more established predictors of development, such as sex. The association of SES with developmental outcomes in this population may present a potential opportunity for policy interventions to improve immediate and longer-term outcomes.

### Strengths and limitations of this study

- Our investigation uses a large, representative population-level database, that allowed us to focus on children with disabilities that make up only a small proportion of the population, while also maximizing external validity and statistical power and minimizing potential selection bias.
- We used data from the EDI, a valid and reliable measure of children's developmental health.
- We focused on early childhood, a time that has been well documented to critically impact children's long-term academic and social trajectory.
- We applied a non-categorical approach to childhood disabilities that reflects current thinking in the field of child development.
- The study's limitation is the exclusive use of neighborhood-level socioeconomic status indicators, without the ability to control for family-level ones.

## Introduction

To date, associations between a number of health outcomes and a combination of economic, human, and social characteristics, commonly conceptualized as socioeconomic gradients, have been reported, including end-stage renal disease, breast cancer, obesity, and cardiometabolic health.<sup>1-6</sup> These studies have mostly focused on chronic conditions in adulthood, with studies on the socioeconomic determinants of child health emerging only more recently.<sup>7-11</sup>

A socioeconomic gradient in typically developing children's developmental health has been reported in a number of high-, middle-, and low-income countries,<sup>12-14</sup> including Canada.<sup>8 15-17</sup> Additionally, the prevalence of childhood disabilities has been consistently shown to be negatively associated with socioeconomic status (SES).<sup>18</sup> Stabile & Currie (2003) used data from the Canadian National Longitudinal Survey of Children and Youth (NLSCY) for children between 0 and 11 years of age to illustrate an inverse relationship between the prevalence of chronic childhood disabilities and SES.<sup>19</sup> Msall and colleagues (2007) reported a more than three-fold difference in disability rates between children living in distressed vs. advantaged neighborhoods in Rhode Island.<sup>20</sup> However, little is known about the relationship between SES and developmental outcomes in children with special needs . Existing evidence most often addresses specific diagnoses during middle childhood, is not representative of all disabilities experienced by children during early childhood, and does not consider the impact of SES outside of the immediate family environment (i.e., neighborhood SES) which has been shown to be a significant influence on developmental outcomes in typically developing children.<sup>8 21 22,23</sup> Understanding determinants of developmental health in early childhood can help in identifying groups of children with disabilities that are likely to be most at risk for worse academic and social outcomes later in life. Such identification is useful for policy planning and the provision of health and education services. The objective of this study is to determine if there is a socioeconomic gradient in the developmental health of children with disabilities at school entry. This work extends existing research in

1  
2  
3 that it focuses on early childhood, a time at which experiences set the trajectory for future academic  
4 and social outcomes, takes a diagnosis-free, non-categorical approach to childhood disability, and uses  
5  
6 population-level data.  
7  
8

## 9 10 **Methods**

11  
12 The project was approved by the Hamilton Integrated Research Ethics Board (no. 2403).  
13

### 14 ***Patient and Public Involvement***

15  
16 Patients/the public were not involved in the design or conduct of this study.  
17

### 18 ***Data Source and Measurement***

19  
20 Data for this study come from a Pan-Canadian database on early childhood development, which  
21 is held at the Offord Centre for Child Studies at McMaster University, a national repository for this  
22 database.<sup>8 24 25</sup> The database includes cross-sectional data from all Canadian provincial implementations  
23 between 2004 and 2014 of the Early Development Instrument (EDI), a population-level instrument  
24 developed by Janus and Offord (2007). The EDI is used to evaluate children's developmental health  
25 outcomes during the kindergarten year across five core domains: physical health & wellbeing, social  
26 competence, emotional maturity, language & cognitive development, and communication skills &  
27 general knowledge.<sup>26</sup> The EDI is completed by teachers in the second half of the kindergarten year (the  
28 year before Grade 1) - usually between February and March - based on their observations of each child.  
29 It is comprised of 103 core items, and domain scores range from 0 to 10, with higher scores indicating  
30 better developmental health. Permission to collect EDI data on kindergarten children was obtained from  
31 the respective provincial and territorial governments. With the exception of the province of Alberta,  
32 which required written consent from parents, data were collected via passive consent. The EDI has been  
33 validated extensively for both typically-developing children<sup>26-35</sup> and those with disabilities.<sup>36</sup>  
34  
35  
36  
37  
38  
39  
40  
41  
42  
43  
44  
45  
46  
47  
48  
49  
50

51  
52 The database also includes data on children's age, sex, and whether they have a "special needs"  
53 designation.<sup>24</sup> The "special needs" designation is the operational indicator of childhood disability in our  
54  
55  
56  
57  
58  
59  
60

1  
2  
3 study. Definitions of “special needs” are set by each province/territory,<sup>37 38</sup> but they are similar and  
4  
5 generally include children with identified health problems, with or without formal medical diagnoses,  
6  
7 that impede their ability to learn in a regular classroom. Children encompassed by this definition have a  
8  
9 broad range of impairments, varying widely in both type (e.g., physical or mental) and severity (e.g., mild  
10  
11 speech impairment to non-verbal). The most common disabilities in this population include learning  
12  
13 disabilities and speech impairments, which is consistent with the prevalence of disabilities in children at  
14  
15 school entry in developed countries.<sup>39 40</sup> The EDI database has been linked to Canadian Census and  
16  
17 Taxfiler data from 2006 and 2005, respectively, using custom-created neighborhood boundaries.<sup>41</sup>  
18  
19 Briefly, the neighborhood boundaries were defined using Statistics Canada’s dissemination blocks and  
20  
21 were created to contain a minimum of 50 and a maximum of 600 valid EDI records per neighborhood.  
22  
23 The criterion of having at least 50 EDI records per neighborhood was based on empirical data on EDI  
24  
25 reliability. The custom-created neighborhood boundaries were based on existing administrative and  
26  
27 geographic divisions and were created in consultation with provincial/territorial governments, to  
28  
29 maximize their meaningfulness. Guhn et al. (2016) provide a more detailed description of the process  
30  
31 for neighborhood boundary definition.<sup>41</sup> Census and Taxfiler variables were used to create the Canadian  
32  
33 Neighborhoods and Early Child Development (CanNECD) SES index, which includes indicators of  
34  
35 education, language/immigration, marital status, wealth, income, dues, social capital, poverty,  
36  
37 residential stability, and income inequality (Table S1).  
38  
39  
40  
41  
42

### 43 **Analysis**

44  
45 All data analyses were conducted in SAS<sup>TM</sup> software using the GLIMMIX procedure.<sup>42</sup> Given that EDI  
46  
47 domain scores are skewed and restricted in range, and that children are clustered within neighborhoods  
48  
49 and schools, the data were analyzed using hierarchical generalized linear modeling (HGLM). The fit of a  
50  
51 range of distributions and link functions were assessed and it was found that the identify link and  
52  
53 gamma distribution produced the best model fit. EDI data were transformed by subtraction from 11 to  
54  
55  
56  
57  
58  
59  
60

1  
2  
3 allow for the gamma distribution to accommodate the left skew. Although children are clustered within  
4 two levels (neighborhoods and schools), only neighborhood of residence was included as a cluster  
5 variable due to data sparseness.<sup>43</sup> All models were performed using the Laplace approximation that  
6 allows estimation of likelihood statistics and has been shown to perform well with regard to accuracy  
7 and precision.<sup>44</sup>

14 EDI domain scores were used as the dependent variable. For each EDI domain, the analysis was  
15 performed hierarchically in three steps. First, an intercept-only model was constructed. Second, a model  
16 with child-level characteristics that have been found to be significant predictors of children's  
17 developmental health (i.e., age, sex, and English/French language learner status (EFSL)) as fixed-effects  
18 was constructed.<sup>26 39</sup> Additionally, year of data collection, province, and the interaction between the two  
19 were included as categorical variables to control for variations in data collection procedures across time  
20 points and provinces. Finally, to evaluate the association between neighborhood-level SES and children's  
21 developmental health, the SES index was added in the third model. Random effects of each of the  
22 individual predictors were added to the final model one-by-one and the overall improvement in the fit  
23 of the model was tested.

36 To assess whether the inclusion of child-level characteristics (age, sex, EFSL status),  
37 neighborhood-level SES, and random effects significantly improved model fit, partial likelihood ratio  
38 tests were performed, and goodness-of-fit indices (i.e., Akaike Information Criterion (AIC), Bayesian  
39 Information Criterion (BIC)) were compared between models. Multicollinearity was tested by examining  
40 variance inflation factor (VIF) statistics for age, sex, EFSL status, and the SES index. VIF statistics for  
41 province of residence, time of data collection, and their interaction are not included as these were  
42 artificially inflated due to having been dummy coded and included as part of a regression model with  
43 few predictors. Leverage statistics, along with plots of raw, Pearson, and studentized residuals were  
44 used to identify outliers and influential observations. Observations with leverage statistics more than



1  
2  
3 twice the mean of all leverage values were investigated for data entry error. A sensitivity analysis was  
4  
5 conducted where observations with outlying studentized residuals, defined as studentized residuals with  
6  
7 absolute values greater than two, were excluded in the estimation of the models. Cases with missing  
8  
9 data were excluded from the analysis but were compared to those without missing data to ensure no  
10  
11 substantial differences in demographic characteristics.  
12  
13

## 14 **Results**

### 15 ***Population Characteristics***

16  
17 A total of 29,520 children with disabilities were identified in the database. Population characteristics are  
18  
19 presented in Table 1.  
20  
21

22  
23 These children resided in 2,016 neighborhoods. Neighborhood characteristics are presented in  
24  
25 Table 2. Forty (1.95%) neighborhoods in the database were excluded from the analysis due to not having  
26  
27 any children with special needs (Table S2). These neighborhoods included fewer children overall, were  
28  
29 of higher SES, and did not proportionally represent Canadian provinces as the majority were in Quebec.  
30  
31

32  
33 Characteristics of children missing any one of the five EDI domain scores are presented in Table  
34  
35 S3. Overall, only a small proportion of children (<2%) were missing data on any of the EDI domains and  
36  
37 these children did not differ in demographic characteristics from the analytic sample.  
38

### 39 ***Model Results***

40  
41 Regression coefficients, their levels of significance, and goodness-of-fit indices from the final model for  
42  
43 each of the EDI domains are presented in Table 3. Additional details on each step of model development  
44  
45 along with goodness-of-fit indices are presented in supplementary tables 4 through 8. The gamma  
46  
47 distribution with an identity link produced the best fit for most domains, as assessed by AIC and BIC  
48  
49 statistics (Table S9). Random effects of predictors did not significantly improve fit and so they were not  
50  
51 included in the final model.  
52  
53  
54  
55  
56  
57  
58  
59  
60

1  
2  
3 The results of the regression analysis indicate that both child-level characteristics and SES are  
4 significant predictors of children's EDI domain scores, as indicated by decreasing deviance, AIC, and BIC  
5 statistics across models, as well as significant likelihood ratio tests (supplementary tables 4 through 8).  
6  
7

8  
9  
10 Year of data collection, province/territory, and the interaction between them were statistically  
11 significant for all domains. Age was statistically significant for all domains except physical health &  
12 wellbeing. Age was positively associated with language and cognitive development scores, and  
13 negatively with emotional maturity, social competence, and communication skills & general knowledge,  
14 with the largest effect sizes seen in the latter two domains and the smallest in physical health &  
15 wellbeing. Sex was statistically significant for all EDI domains and, on average, girls had higher scores  
16 than boys on all domains of the EDI, with the smallest sex differences in language & cognitive  
17 development, and largest in emotional maturity. English/French language learners had higher scores  
18 than non-learners in emotional maturity (smallest absolute effect) but lower scores in language &  
19 cognitive development and communication skills & general knowledge (largest absolute effect). The SES  
20 index was a statistically significant predictor of all EDI domains and was consistently positively  
21 associated with all domain scores. The smallest association was observed for the emotional maturity  
22 scores, and the largest for and language & cognitive development.  
23  
24  
25  
26  
27  
28  
29  
30  
31  
32  
33  
34  
35  
36  
37  
38

### 39 ***Model Diagnostics and Sensitivity Analyses***

40  
41 Excluding categorical variables, all VIF statistics were below the cut-off of 10 and ranged from 1.05 and  
42 1.10. Studentized residuals were used to identify influential and outlying observations. The results of the  
43 sensitivity analysis excluding cases with absolute studentized residual values greater than 2 are  
44 presented in Table S10 through 14. The results from this sensitivity analysis were very similar to the  
45 results of the primary analysis.  
46  
47  
48  
49  
50  
51  
52  
53  
54  
55  
56  
57  
58  
59  
60

## Discussion

The objective of this investigation was to examine the association between neighborhood-level SES and developmental health in children with disabilities (operationally defined as “special needs” designation) at school entry, in order to determine the importance of contextual factors in predicting outcomes in this population. The results indicate that neighborhood-level SES is a consistent and significant predictor of developmental outcomes in this population. An average difference of 0.12 to 0.29 points in EDI domain scores was observed per standard deviation difference in SES, with higher EDI domain scores being observed in higher SES neighborhoods. Neighborhood-level SES had the strongest association with the language & cognitive development domain and the weakest with emotional maturity domain.

### *Consistency with previous studies*

Comparing the magnitude of association between SES and developmental health with previous literature is difficult due to differences in the operationalization of these constructs and differences in analytic methods. Previous studies, mostly conducted with typically developing children,<sup>12</sup> have either explored the direct association between SES and developmental health<sup>8 15-17 45</sup> or investigated mediators of this relationship, including parent/child activities, access to a computer, participation in organized classes and activities, and maternal mental health.<sup>46-48</sup> Most of these studies measured SES at the individual family level and all demonstrated a positive association between social and economic variables and developmental health.

Among the studies done in typically developing populations, five use EDI outcomes, with four including neighborhood-level measures of SES.<sup>8 15 17 49</sup> All studies demonstrated a positive association between SES and the EDI. Webb et al. compared neighborhood effects in typically developing children using four published neighborhood SES indices.<sup>8</sup> Forer et al. examined the same association using the CanNECD index. Both these studies showed that the strength of association between the indices and EDI

1  
2  
3 domains varied, depending on the domain and SES index used. Similar to our results, the strongest  
4  
5 association was consistently found for the language & cognitive development domain.  
6

7  
8 The few studies done in children with disabilities also report a positive association between SES  
9  
10 and academic and social outcomes.<sup>21-23 50-52</sup> These studies are different from the present investigation in  
11  
12 that they only focus on a few high-incidence diagnoses, such as learning disabilities during middle  
13  
14 childhood and adolescence and do not measure SES at the neighborhood-level.  
15

### 16 17 ***Strengths and limitations***

18  
19 There are several strengths of this study. First, we used population-level data, which made focusing on  
20  
21 children with disabilities that only make up a small proportion of the population possible, while also  
22  
23 maximizing external validity and statistical power and minimizing potential selection bias. Second, we  
24  
25 focused on early childhood, a time that critically impacts children's long-term academic and social  
26  
27 trajectory.<sup>53</sup> Third, we applied a non-categorical approach to childhood disabilities which reflects current  
28  
29 thinking in the field of child development and findings that diagnostic categories often do not fully  
30  
31 reflect the actual abilities and needs of children.<sup>54-56</sup> Fourth, the EDI has undergone extensive reliability  
32  
33 and validity testing, and has been found to be predictive of academic achievement and social  
34  
35 functioning throughout early and middle childhood.<sup>26-35</sup> The psychometric performance of the EDI in  
36  
37 children with special needs has also been found similar to its performance in typically developing  
38  
39 children.<sup>36</sup> Currently, the EDI is the only available indicator of developmental health that allows  
40  
41 examination of variability across Canada at a population-level. Finally, the analytic methods used in this  
42  
43 investigation appropriately take into account the skewed distribution and nesting of EDI data, which  
44  
45 prevents artificially deflated standard errors and hence inappropriate statistically significant findings.  
46  
47  
48  
49

50  
51 This investigation is also subject to limitations. First, due to the cross-sectional design of this  
52  
53 study, causality cannot be established. There is evidence that developmental problems in children may  
54  
55 increase parental stress and impact the general socioeconomic wellbeing of families.<sup>57 58</sup> Additionally,  
56  
57  
58  
59

1  
2  
3 there is the possibility of self-selection where families with similar experiences may choose to reside  
4 within similar neighborhoods. Regardless of causality, or lack thereof, the results of this study indicate  
5 that services aimed at young children with disabilities that are particularly accessible in low SES  
6 neighborhoods are likely to be most impactful.  
7  
8  
9  
10

11  
12 Second, we used a very broad definition of disability, which is based on the designation of the  
13 child by the education system at kindergarten, and hence, children with disabilities who did not have  
14 this designation by the education system were excluded. It is possible that a very small minority of  
15 children who were not typically developing but did not have this designation were excluded.  
16  
17  
18  
19  
20

21 Third, the SES index may not accurately reflect the socioeconomic condition of the  
22 neighborhoods in which children were raised. The variables used to construct the SES index come from  
23 2005 and 2006, whereas EDI data were collected between 2004 and 2014. It is possible that changes in  
24 neighborhoods or relocation of families could render the SES index less reflective of the true early  
25 environment for some groups of children, which may have led to underestimation of the association  
26 between SES and developmental outcomes. However, empirical evidence indicates that it is unlikely for  
27 neighborhood characteristics to drastically change over time or for families move to neighborhoods  
28 which are greatly different from their previous ones.<sup>59</sup> This appears to be confirmed by the remarkable  
29 stability of the CanNECD SES Index, the measure used in this study, over the period of five years.<sup>49</sup>  
30  
31  
32  
33  
34  
35  
36  
37  
38  
39  
40

41 Finally, we were unable to control for family-level SES in the models. Thus, it is not possible to  
42 determine whether this association is driven by neighborhood or family characteristics. We were also  
43 unable to control for specific diagnoses or severity of disabilities that have undoubted impact on child  
44 development. Similar investigation should be extended for smaller subgroups of children who share  
45 diagnoses or functional impairments.  
46  
47  
48  
49  
50  
51  
52  
53  
54  
55  
56  
57  
58  
59  
60

### **Implications**

Our findings indicate that the relationship between SES and developmental outcomes also holds for children with disabilities.<sup>8 15-17 45 60</sup> This underscores the potential impact of the early environment of children on their development. Although clinicians often focus on biological factors, such as family history of disabilities and harmful exposures in utero, social influences have commonly been found to be more predictive of long-term developmental and academic outcomes and may be more amenable to change.<sup>45</sup> According to survey data, clinicians are receptive to screening for social determinants of health outside of the purview of clinical care, suggesting that the findings of this investigation are likely to be relevant and acceptable to those in the clinical community.<sup>61</sup> Our findings show that the association between child development and socioeconomic status, which is well-established for typically developing children, also exists for children with disabilities. This highlights the urgency for improving the social and economic context in which children are raised, in addition to targeted interventions delivered at the individual child level. Failure to do so will likely result in further perpetuation of inequities in child development – more so as children with disabilities are already among the most disadvantaged groups globally.<sup>18 62</sup> It remains to be seen whether large-scale policy interventions can help in reducing disparities in this population similarly to other groups.<sup>63</sup>

It is important to consider the findings in context of the availability of support services for children with special needs in Canada prior to school entry. The strategies, programs, and accessibility vary by province/territory, and often within jurisdictions, as municipal and regional health units are often service providers, but generally access is easier for children with a specific diagnosis than for those with unspecified disorders.<sup>55</sup> While there are no detailed studies on the potential association of service availability or magnitude of waiting lists with neighborhood SES per se, there could be at least two pathways to such relation. First, services tend to be located in large urban centres (with likely higher SES overall), where there are more professionals.<sup>64 65</sup> Second, navigation of the care systems, especially for

1  
2  
3 preschool children rests largely on the shoulders of parents: the ability to do so effectively is likely  
4  
5 associated with their personal and economic resources and where they live.<sup>66 67</sup>  
6

7  
8 Additional investigations could further strengthen and contextualize these findings. Specifically,  
9  
10 establishing the consistency and relative strength of the relationship between SES and developmental  
11  
12 outcomes across subgroups of physical, behavioral, and learning disabilities, as well as subgroups based  
13  
14 on severity of condition and time of diagnosis, would further untangle the relationship between SES,  
15  
16 disabilities, and development, and would be helpful in identifying service provision strategies that are  
17  
18 likely to be most successful in improving outcomes.  
19

## 20 21 **Conclusion**

22  
23 The results from this investigation show neighborhood SES to be significantly associated with the  
24  
25 developmental health of children with disabilities at school entry. These findings have implications for  
26  
27 policy planning and provision of health and educational service and draw attention to the universality of  
28  
29 importance of contextual factors for development of all children.  
30  
31

32  
33 **Funding:** This work was supported by an operating grant from the Canadian Institutes of Health  
34  
35 Research, grant number 142416. DZ was supported by a Canada Graduate Scholarships-Master's Award  
36  
37 and is currently supported by a CIHR Doctoral Award. TB is supported by a Hamilton Health Sciences  
38  
39 Early Career Award. MJ is supported by the Ontario Chair in Early Childhood Development.  
40

41  
42 **Competing interests:** None.  
43

44  
45 **Contributions:** DZ, ED, TB, MJ, MG, BF, and MB conceived the study. DZ analyzed and ED provided  
46  
47 technical expertise. DZ wrote the first draft of the manuscript and all authors made significant  
48  
49 contributions to the manuscript.  
50

51  
52 **Data sharing statement:** The dataset analyzed in the current study is not publicly available due to  
53  
54 multiple jurisdictional privacy restrictions, but it is available at the host institution.  
55  
56  
57  
58  
59

## References

1. Marmot MG, Rose G, Shipley M, et al. Employment grade and coronary heart disease in British civil servants. *J Epidemiol Community Health* 1978;32(4):244-49.
2. Marmot MG, Stansfeld S, Patel C, et al. Health inequalities among British civil servants: the Whitehall II study. *The Lancet* 1991;337(8754):1387-93.
3. Hill KE, Gleadle JM, Pulvirenti M, et al. The social determinants of health for people with type 1 diabetes that progress to end-stage renal disease. *Health Expect* 2015;18(6):2513-21.
4. Shariff-Marco S, Yang J, John EM, et al. Intersection of race/ethnicity and socioeconomic status in mortality after breast cancer. *J Community Health* 2015;40(6):1287-99.
5. Tomayko E, Flood T, Tandias A, et al. Linking electronic health records with community-level data to understand childhood obesity risk. *Pediatric obesity* 2015;10(6):436-41.
6. Puckrein GA, Egan BM, Howard G. Social and Medical Determinants of Cardiometabolic Health: The Big Picture. *Ethn Dis* 2015;25(4):521.
7. Keating DP, Hertzman C. Developmental health and the wealth of nations: Social, biological, and educational dynamics: Guilford Press 2000.
8. Webb S, Janus M, Duku E, et al. Neighbourhood socioeconomic status indices and early childhood development. *SSM Popul Health* 2017;3:48-56.
9. Frederick CB, Snellman K, Putnam RD. Increasing socioeconomic disparities in adolescent obesity. *Proc Natl Acad Sci* 2014;111(4):1338-42.
10. Cabieses B, Pickett KE, Wilkinson RG. The Impact of Socioeconomic Inequality on Children's Health and Well-being. *The Oxford Handbook of Economics and Human Biology*: Oxford University Press 2016.
11. Wang C, Guttmann A, To T, et al. Neighborhood income and health outcomes in infants: how do those with complex chronic conditions fare? *Arch Pediatr Adolesc Med* 2009;163(7):608-15.
12. Letourneau NL, Duffett-Leger L, Levac L, et al. Socioeconomic status and child development: A meta-analysis. *Emot Behav Disord* 2013;21(3):211-24.
13. Kershaw P, Forer B, Irwin LG, et al. Toward a social care program of research: A population-level study of neighborhood effects on child development. *Early Educ Dev* 2007;18(3):535-60.
14. Carpiano RM, Lloyd JE, Hertzman C. Concentrated affluence, concentrated disadvantage, and children's readiness for school: A population-based, multi-level investigation. *Soc Sci Med* 2009;69(3):420-32.
15. Oliver LN, Dunn JR, Kohen DE, et al. Do neighbourhoods influence the readiness to learn of kindergarten children in Vancouver? A multilevel analysis of neighbourhood effects. *Environ Plan A* 2007;39(4):848-68.
16. Guhn M, Gadermann AM, Hertzman C, et al. Children's development in kindergarten: A multilevel, population-based analysis of ESL and gender effects on socioeconomic gradients. *Child Indic Res* 2010;3(2):183-203.
17. Lapointe VR, Ford L, Zumbo BD. Examining the relationship between neighborhood environment and school readiness for kindergarten children. *Early Educ Dev* 2007;18(3):473-95.
18. Spencer NJ, Blackburn CM, Read JM. Disabling chronic conditions in childhood and socioeconomic disadvantage: a systematic review and meta-analyses of observational studies. *BMJ open* 2015;5(9):e007062.
19. Stabile M, Currie J. Socioeconomic Status and Child Health: Why Is the Relationship Stronger for Older Children? *Am Econ Rev* 2003;93(5):1813-23.
20. Msall ME, Avery RC, Msall ER, et al. Distressed neighborhoods and child disability rates: analyses of 157 000 school-age children. *Dev Med Child Neurol* 2007;49(11):814-17.



- 1
- 2
- 3
- 4 21. Turner S, Alborz A, Gayle V. Predictors of academic attainments of young people with Down's
- 5 syndrome. *J Intellect Disabil Res* 2008;52(5):380-92.
- 6
- 7 22. Turner S, Sloper P, Knussen C, et al. Socio-economic factors: their relationship with child and family
- 8 functioning for children with Down's syndrome. *J Appl Res Intellect Disabil* 1991;4(1):80-100.
- 9
- 10 23. Szumski G, Karwowski M. School achievement of children with intellectual disability: The role of
- 11 socioeconomic status, placement, and parents' engagement. *Res Dev Disabil* 2012;33(5):1615-
- 12 25.
- 13 24. Janus M, Brownell, M., Reid-Westoby, C., Bennet, T., Birken, C., Coplan, R., Duku, E., Ferro, M. A.,
- 14 Forer, B., Georgiades, S., Gorter, J. W., Guhn, M., Maguire, J., Manson, H., Pei, J., Santos, R. .
- 15 Establishing a protocol for building a pan-Canadian population-based monitoring system for
- 16 early childhood development for children with health disorders - Canadian Children's Health in
- 17 Context Study (CCHICS). *BMJ Open* 2018 8(5):e023688.
- 18
- 19 25. Janus M, Enns J, Forer B, et al. A pan-Canadian data resource for monitoring child developmental
- 20 health: The Canadian Neighbourhoods Early Child Development (CanNECD) database.
- 21 *International Journal of Population Data Science* 2018;3(3):1-11.
- 22
- 23 26. Janus M, Offord DR. Development and psychometric properties of the Early Development
- 24 Instrument (EDI): A measure of children's school readiness. *Can J Behav Sci* 2007;39(1):1.
- 25
- 26 27. Janus M, Hughes D, Duku E. Patterns of school readiness among selected subgroups of Canadian
- 27 children: Children with special needs and children with diverse language backgrounds. Canadian
- 28 Council on Learning. Hamilton, Ontario, 2010.
- 29
- 30 28. Andrich D, Styles I. Final Report on the Psychometric Analysis of the Early Development Instrument
- 31 (EDI) Using the Rasch Model: A Technical Paper Commissioned for the Development of the
- 32 Australian Early Development Instrument (AEDI). Murdoch University, 2004.
- 33
- 34 29. Forget-Dubois N, Lemelin J-P, Boivin M, et al. Predicting early school achievement with the EDI: A
- 35 longitudinal population-based study. *Early Educ Dev* 2007;18(3):405-26.
- 36
- 37 30. Guhn M, Gadermann A, Zumbo BD. Does the EDI measure school readiness in the same way across
- 38 different groups of children? *Early Educ Dev* 2007;18(3):453-72.
- 39
- 40 31. Guhn M, Goelman H. Bioecological theory, early child development and the validation of the
- 41 population-level early development instrument. *Soc Indic Res* 2011;103(2):193-217.
- 42
- 43 32. Janus M, Brinkman SA, Duku EK. Validity and psychometric properties of the early development
- 44 instrument in Canada, Australia, United States, and Jamaica. *Soc Indic Res* 2011;103(2):283-97.
- 45
- 46 33. Brinkman S, Gregory T, Harris J, et al. Associations between the early development instrument at age
- 47 5, and reading and numeracy skills at ages 8, 10 and 12: a prospective linked data study. *Child*
- 48 *Indic Res* 2013;6(4):695-708.
- 49
- 50 34. Davies S, Janus M, Duku E, et al. Using the Early Development Instrument to examine cognitive and
- 51 non-cognitive school readiness and elementary student achievement. *Early Child Res Q*
- 52 2016;35:63-75.
- 53
- 54 35. Forer B, Zumbo BD. Validation of multilevel constructs: Validation methods and empirical findings for
- 55 the EDI. *Soc Indic Res* 2011;103(2):231.
- 56
- 57 36. Janus M, Zeraatkar D, Duku E, et al. Validation of the Early Development Instrument for children with
- 58 special health needs. *Paediatr Child Health* 2018;55(6):659-65.
- 59
- 60 37. Janus M, Lefort J, Cameron R, et al. Starting kindergarten: Transition issues for children with special
- needs. *CJE* 2007:628-48.
38. Dworet D, Bennett S. A view from the north: Special education in Canada. *TEC* 2002;34(5):22.
39. Goldfeld S, O'Connor M, Sayers M, et al. Prevalence and correlates of special health care needs in a
- population cohort of Australian children at school entry. *J Dev Behav Pediatr* 2012;33(4):319-27.
40. Boyle GJ. Does item homogeneity indicate internal consistency or item redundancy in psychometric
- scales? *Personality and individual differences* 1991;12(3):291-94.

- 1
- 2
- 3
- 4 41. Guhn M, Janus M, Enns J, et al. Examining the social determinants of children's developmental
- 5 health: protocol for building a pan-Canadian population-based monitoring system for early
- 6 childhood development. *BMJ open* 2016;6(4):e012020.
- 7 42. SAS University Edition [program]. Cary, NC: SAS Institute, 2017.
- 8 43. Schunck R. Cluster Size and Aggregated Level 2 Variables in Multilevel Models. A Cautionary Note.
- 9 *mda* 2016;10(1):97-108.
- 10 44. Kim Y, Choi Y-K, Emery S. Logistic regression with multiple random effects: a simulation study of
- 11 estimation methods and statistical packages. *Am Stat* 2013;67(3):171-82.
- 12 45. Nelson BB, Dudovitz RN, Coker TR, et al. Predictors of poor school readiness in children without
- 13 developmental delay at age 2. *Pediatrics* 2016:e20154477.
- 14 46. Hsu H-C, Wickrama KA. Linking family economic hardship to early childhood health: An investigation
- 15 of mediating pathways. *Matern Child Health J* 2015;19(12):2636-45.
- 16 47. Larson K, Russ SA, Nelson BB, et al. Cognitive ability at kindergarten entry and socioeconomic status.
- 17 *Pediatrics* 2015;135(2):e440-e48.
- 18 48. Shah R, Sobotka SA, Chen Y-F, et al. Positive parenting practices, health disparities, and
- 19 developmental progress. *Pediatrics* 2015:peds. 2014-3390.
- 20 49. Forer B, Minh A, Enns J, et al. A Canadian Neighbourhood Index for Socioeconomic Status Associated
- 21 with Early Child Development. *Child Indic Res* 2019:1-22.
- 22 50. King G, McDougall J, DeWit D, et al. Pathways to children's academic performance and prosocial
- 23 behaviour: Roles of physical health status, environmental, family, and child factors. *Int J Disabil*
- 24 *Dev Educ* 2005;52(4):313-44.
- 25 51. Emerson E, Hatton C, MacLean J, William E. Contribution of socioeconomic position to health
- 26 inequalities of British children and adolescents with intellectual disabilities. *Am J Ment Retard*
- 27 2007;112(2):140-50.
- 28 52. Hauser-Cram P, Durand TM, Warfield ME. Early feelings about school and later academic outcomes
- 29 of children with special needs living in poverty. *Early Child Res Q* 2007;22(2):161-72.
- 30 53. Irwin LG, Siddiqi A, Hertzman C. Early child development: A powerful equalizer. Final report to the
- 31 WHO Commission on social determinants of health, Geneva, 2007.
- 32 54. Stein R, Jessop DJ. A noncategorical approach to chronic childhood illness. *Public Health Rep*
- 33 1982;97(4):354.
- 34 55. McDowell M, O'Keefe M. Public services for children with special needs: discrimination by
- 35 diagnosis? *J Paediatr Child Health* 2012;48(1):2-5.
- 36 56. Rosenbaum P, Gorter J. The 'F-words' in childhood disability: I swear this is how we should think!
- 37 *Child Care Health Dev* 2012;38(4):457-63.
- 38 57. Anderson L, Larson S, Lakin C, et al. Children with disabilities: social roles and family impacts in the
- 39 NHIS-D. *DD data brief* 2002;4(1):1-12.
- 40 58. Hayes SA, Watson SL. The impact of parenting stress: A meta-analysis of studies comparing the
- 41 experience of parenting stress in parents of children with and without autism spectrum
- 42 disorder. *J Autism Dev Disord* 2013;43(3):629-42.
- 43 59. Kunz J, Page ME, Solon G. Are point-in-time measures of neighborhood characteristics useful proxies
- 44 for children's long-run neighborhood environment? *Econ Lett* 2003;79(2):231-37.
- 45 60. Jutte DP, Brownell M, Roos NP, et al. Rethinking what is important: biologic versus social predictors
- 46 of childhood health and educational outcomes. *Epidemiology* 2010;21(3):314-23.
- 47 61. Garg A, Butz AM, Dworkin PH, et al. Screening for basic social needs at a medical home for low-
- 48 income children. *Clin Pediatr (Phila)* 2009;48(1):32-36.
- 49 62. Leitman R, Cooner E, Risher P. NOD/Harris Survey of Americans with Disabilities: Louis Harris and
- 50 Associates 1994.
- 51
- 52
- 53
- 54
- 55
- 56
- 57
- 58
- 59
- 60

- 1  
2  
3 63. Kamerman SB, Neuman M, Waldfogel J, et al. Social policies, family types and child outcomes in  
4 selected OECD countries. *OECD* 2003  
5  
6 64. Underwood K. Mapping the early intervention system in Ontario, Canada. *International Journal of*  
7 *Special Education* 2012;27(2):126-35.  
8  
9 65. Graham K, Underwood K. The reality of rurality: Rural parents' experiences of early years services.  
10 *Health & Place* 2012;18(6):1231-39.  
11  
12 66. Underwood K, Frankel E, Parekh G, et al. Transitioning Work of Families: Understanding Trans-  
13 institutional Power in Early Childhood Programs and Services. *Exceptionality Education*  
14 *International* 2019;29:135-53.  
15  
16 67. Wyngaarden Krauss M, Wells N, Gulley S, et al. Navigating systems of care: Results from a national  
17 survey of families of children with special health care needs. *Children's Services: Social Policy,*  
18 *Research, and Practice* 2001;4(4):165-87.  
19  
20  
21  
22  
23  
24  
25  
26  
27  
28  
29  
30  
31  
32  
33  
34  
35  
36  
37  
38  
39  
40  
41  
42  
43  
44  
45  
46  
47  
48  
49  
50  
51  
52  
53  
54  
55  
56  
57  
58  
59  
60

**Table 1: Population characteristics**

| <b>Sex</b>                         | <b>N (% of population of children with disabilities)</b> |
|------------------------------------|----------------------------------------------------------|
| Female                             | 8906 (30.2)                                              |
| Male                               | 20585 (69.7)                                             |
| Missing                            | 29 (0.1)                                                 |
| <b>Age</b>                         |                                                          |
| Mean (SD)                          | 5.79 (0.41)                                              |
| Missing                            | 114 (0.39)                                               |
| <b>EFSL Status</b>                 |                                                          |
| <b>N (%)</b>                       |                                                          |
| Yes                                | 3637 (12.3)                                              |
| No                                 | 25402 (86.0)                                             |
| Missing                            | 481 (1.6)                                                |
| <b>Province</b>                    |                                                          |
| <b>N (%)</b>                       |                                                          |
| Alberta                            | 2099 (7.1)                                               |
| British Columbia                   | 5044 (17.1)                                              |
| Manitoba                           | 2468 (8.4)                                               |
| New Brunswick                      | 327 (1.1)                                                |
| Newfoundland                       | 641 (2.2)                                                |
| Nova Scotia                        | 1083 (3.7)                                               |
| Northwest Territories              | 65 (0.2)                                                 |
| Ontario                            | 13198 (44.7)                                             |
| Prince Edward Island               | 29 (0.1)                                                 |
| Quebec                             | 3023 (10.2)                                              |
| Saskatchewan                       | 1440 (4.9)                                               |
| Yukon                              | 103 (0.3)                                                |
| <b>Year of data collection</b>     |                                                          |
| <b>N (%)</b>                       |                                                          |
| 2004                               | 474 (1.6)                                                |
| 2005                               | 2332 (7.9)                                               |
| 2006                               | 4304 (14.6)                                              |
| 2007                               | 1471 (5.0)                                               |
| 2008                               | 1762 (6.0)                                               |
| 2009                               | 4786 (16.2)                                              |
| 2010                               | 2658 (9.0)                                               |
| 2011                               | 3494 (11.8)                                              |
| 2012                               | 5140 (17.4)                                              |
| 2013                               | 2711 (9.2)                                               |
| 2014                               | 388 (1.3)                                                |
| <b>Mean (SD) EDI domain scores</b> |                                                          |
| PHWB                               | 7.02 (2.12)                                              |
| SC                                 | 5.71 (2.63)                                              |
| EM                                 | 6.13 (1.99)                                              |
| LCD                                | 6.18 (3.01)                                              |
| CSGK                               | 4.37 (3.27)                                              |

PHWB=Physical health & wellbeing; SC=Social competence; EM=Emotional maturity; LCD=Language & cognitive development; CSGK=communication skills & general knowledge

**Table 2: Neighborhood characteristics (N=2016)**

| <b>Province</b>                                                               | <b>Number of neighborhoods (%)</b> |
|-------------------------------------------------------------------------------|------------------------------------|
| Alberta                                                                       | 259 (12.8)                         |
| British Columbia                                                              | 298 (14.7)                         |
| Manitoba                                                                      | 75 (3.7)                           |
| New Brunswick                                                                 | 48 (2.4)                           |
| Newfoundland                                                                  | 41 (2.0)                           |
| Nova Scotia                                                                   | 57 (2.8)                           |
| Northwest Territories                                                         | 3 (0.1)                            |
| Ontario                                                                       | 795 (39.4)                         |
| Prince Edward Island                                                          | 6 (0.3)                            |
| Quebec                                                                        | 373 (18.5)                         |
| Saskatchewan                                                                  | 55 (2.7)                           |
| Yukon                                                                         | 6 (0.3)                            |
| <b>Median (IQR) number of children with disabilities in each neighborhood</b> | 11 (6 – 19)                        |
| <b>Median (IQR) number of children in each neighborhood</b>                   | 128 (87 – 194)                     |

**Table 3: Final Hierarchical Generalized Linear Models (HGLMs) for the Early Development Instrument (EDI)**

| Variables          | Physical health & wellbeing (PHWB) | Social competence (SC)        | Emotional maturity (EM)       | Language & cognitive development (LCD) | Communication skills & general knowledge (CSGK) |
|--------------------|------------------------------------|-------------------------------|-------------------------------|----------------------------------------|-------------------------------------------------|
|                    | $\beta$ coefficient (95% CIs)      | $\beta$ coefficient (95% CIs) | $\beta$ coefficient (95% CIs) | $\beta$ coefficient (95% CIs)          | $\beta$ coefficient (95% CIs)                   |
| Age                | -0.04 (-0.01 to 0.03)              | -0.13 (-0.22 to -0.05)        | -0.08 (-0.14 to -0.02)        | 0.10 (0.01 to 0.18)                    | -0.13 (-0.24 to -0.02)                          |
| Sex (M=0; F=1)     | 0.14 (0.08 to 0.19)                | 0.76 (0.69 to 0.83)           | 0.81 (0.76 to 0.86)           | 0.13 (0.05 to 0.21)                    | 0.43 (0.33 to 0.53)                             |
| EFSL (no=0; yes=1) | 0.04 (-0.04 to 0.12)               | -0.10 (-0.20 to 0.01)         | 0.12 (0.05 to 0.20)           | -0.43 (-0.56 to -0.31)                 | -1.11 (-0.94 to -1.27)                          |
| SES z-score        | 0.17 (0.14 to 0.20)                | 0.17 (0.13 to 0.21)           | 0.12 (0.09 to 0.15)           | 0.29 (0.24 to 0.33)                    | 0.19 (0.14 to 0.24)                             |

95% CIs=95% confidence intervals; EFSL=English/French as a second language; SES=socioeconomic status

Note that coefficient presented in this table reflect the directionality of the association between variables and untransformed EDI scores.

**Table S1: Variables included in the Canadian Neighbourhoods and Early Child Development (CanNECD) socioeconomic status (SES) index**

|                              |                                                                                    |
|------------------------------|------------------------------------------------------------------------------------|
| <b>Education</b>             | % with no high school diploma                                                      |
| <b>Language/Immigration</b>  | % not speaking either official language at home                                    |
| <b>Marital Status</b>        | % separated or divorced                                                            |
| <b>Wealth</b>                | % with investment income, families with children under 6                           |
| <b>High Income</b>           | % with incomes $\geq$ twice than provincial median, families with children under 6 |
| <b>Dues</b>                  | % with union/association dues, families with children under 6                      |
| <b>Social Capital</b>        | % with charitable donations, families with children under 6                        |
| <b>Poverty</b>               | % with low income, lone parent families with children under 6                      |
| <b>Residential Stability</b> | % non-migrant movers in the past year                                              |
| <b>Income Inequality</b>     | Gini Coefficient, lone female families with children under 6                       |

**Table S2: Descriptive characteristics of neighborhoods excluded from analysis (n=40)**

| <b>Province</b>                                              | <b>Number of neighborhoods (%)</b> |
|--------------------------------------------------------------|------------------------------------|
| <b>Alberta</b>                                               | 8 (20)                             |
| <b>New Brunswick</b>                                         | 4 (10)                             |
| <b>Ontario</b>                                               | 5 (12.5)                           |
| <b>Quebec</b>                                                | 23 (57.5)                          |
| <b>Median (IQR) number of children in each neighbourhood</b> | 83 (56-141)                        |
| <b>Mean (SD) of standardized SES index</b>                   | 0.38 (0.88)                        |



**Table S3: Descriptive characteristics of population of children with missing Physical Health & Wellbeing (PHWB) scores (n=446)**

|                                    | PHWB         | SC          | EM          | LCD         | CSGK        |
|------------------------------------|--------------|-------------|-------------|-------------|-------------|
| <b>Sex</b>                         | <b>N (%)</b> |             |             |             |             |
| Female                             | 123 (27.6)   | 138 (30.5)  | 166 (27.7)  | 154 (28.4)  | 128 (30.4)  |
| Male                               | 318 (71.3)   | 311 (68.7)  | 429 (71.5)  | 384 (70.8)  | 289 (68.6)  |
| Missing                            | 5 (1.1)      | 4 (0.9)     | 5 (0.8)     | 4 (0.7)     | 4 (1.0)     |
| <b>Age</b>                         | <b>N (%)</b> |             |             |             |             |
| Mean (SD)                          | 5.78 (0.40)  | 5.73 (0.4)  | 5.78 (0.4)  | 5.76 (0.4)  | 5.76 (0.41) |
| Missing                            | 7 (1.57)     | 6 (1.3)     | 8 (1.3)     | 6 (1.1)     | 7 (1.66)    |
| <b>EFSL Status</b>                 | <b>N (%)</b> |             |             |             |             |
| Yes                                | 61 (13.7)    | 61 (13.5)   | 76 (12.7)   | 77 (14.2)   | 59 (14.0)   |
| No                                 | 379 (85.0)   | 386 (85.2)  | 511 (85.2)  | 457 (84.3)  | 355 (84.3)  |
| Missing                            | 6 (1.3)      | 6 (1.3)     | 13 (2.2)    | 8 (1.5)     | 7 (1.7)     |
| <b>Province</b>                    | <b>N (%)</b> |             |             |             |             |
| Alberta                            | 82 (18.4)    | 84 (18.5)   | 92 (15.3)   | 91 (16.8)   | 85 (20.2)   |
| British Columbia                   | 9 (2.0)      | 17 (3.8)    | 41 (6.8)    | 45 (8.3)    | 7 (1.7)     |
| Manitoba                           | 122 (27.4)   | 117 (25.8)  | 131 (21.8)  | 121 (22.3)  | 113 (26.8)  |
| New Brunswick                      | 1 (0.2)      | 1 (0.2)     | 4 (0.7)     | 1 (0.2)     | 0 (0)       |
| Newfoundland                       | 3 (0.7)      | 6 (1.3)     | 6 (1.0)     | 3 (0.6)     | 5 (1.2)     |
| Nova Scotia                        | 15 (3.4)     | 14 (3.1)    | 20 (3.3)    | 21 (3.9)    | 15 (3.6)    |
| Northwest Territories              | 1 (0.2)      | 1 (0.2)     | 2 (0.3)     | 1 (0.2)     | 1 (0.2)     |
| Ontario                            | 193 (43.3)   | 192 (42.4)  | 241 (40.2)  | 222 (41.0)  | 173 (41.1)  |
| Prince Edward Island               | 0 (0)        | 0 (0)       | 0 (0)       | 1 (0.2)     | 0 (0)       |
| Quebec                             | 5 (1.1)      | 3 (0.7)     | 33 (5.5)    | 15 (2.8)    | 7 (1.7)     |
| Saskatchewan                       | 8 (1.8)      | 13 (2.9)    | 19 (3.2)    | 14 (2.6)    | 10 (2.4)    |
| Yukon                              | 0 (0)        | 0 (0)       | 0 (0)       | 0 (0)       | 0 (0)       |
| <b>Year of data collection</b>     | <b>N (%)</b> |             |             |             |             |
| 2004                               | 3 (0.7)      | 3 (0.7)     | 7 (1.2)     | 3 (0.6)     | 2 (0.5)     |
| 2005                               | 19 (4.3)     | 17 (3.8)    | 29 (4.8)    | 21 (3.9)    | 12 (2.9)    |
| 2006                               | 46 (10.3)    | 44 (9.7)    | 77 (12.8)   | 61 (11.3)   | 46 (10.9)   |
| 2007                               | 26 (5.8)     | 23 (5.1)    | 39 (6.5)    | 32 (5.9)    | 21 (5.0)    |
| 2008                               | 33 (7.4)     | 34 (7.5)    | 43 (7.2)    | 39 (7.2)    | 32 (7.6)    |
| 2009                               | 50 (11.2)    | 55 (12.1)   | 70 (11.7)   | 69 (12.7)   | 43 (10.2)   |
| 2010                               | 51 (11.4)    | 48 (10.6)   | 57 (9.5)    | 58 (10.7)   | 43 (10.2)   |
| 2011                               | 96 (21.5)    | 96 (21.2)   | 113 (18.8)  | 113 (20.8)  | 97 (23.0)   |
| 2012                               | 51 (11.4)    | 56 (12.4)   | 80 (13.3)   | 67 (12.4)   | 53 (12.6)   |
| 2013                               | 71 (15.9)    | 74 (16.3)   | 84 (14.0)   | 79 (14.6)   | 72 (17.1)   |
| 2014                               | 0 (0)        | 3 (0.7)     | 1 (0.2)     | 0 (0)       | 0 (0)       |
| <b>Mean (SD) EDI domain scores</b> |              |             |             |             |             |
| PHWB                               | NA           | 5.06 (2.17) | 6.70 (2.33) | 6.82 (2.09) | 7.71 (1.96) |
| SC                                 | 5.42 (2.97)  | NA          | 5.47 (2.54) | 4.78 (2.33) | 5.97 (2.98) |
| EM                                 | 5.90 (2.53)  | 5.42 (1.44) | NA          | 5.65 (1.89) | 6.31 (1.36) |
| LCD                                | 5.39 (3.31)  | 1.98 (2.38) | 5.51 (3.15) | NA          | 6.29 (3.46) |
| CSGK                               | 3.80 (3.34)  | 0.86 (1.91) | 3.77 (3.06) | 2.93 (2.74) | NA          |

PHWB=Physical health & wellbeing; SC=Social competence; EM=Emotional maturity; LCD=Language & cognitive development; CSGK=communication skills & general knowledge

**Table S4: Hierarchical Generalized Linear Model (HGLM) for the Physical Health & Wellbeing (PHWB) main of the Early Development Instrument (EDI)**

| Parameter              | Model 1            |             |         |         | Model 2            |             |           |         | Model 3            |             |           |         |
|------------------------|--------------------|-------------|---------|---------|--------------------|-------------|-----------|---------|--------------------|-------------|-----------|---------|
|                        | B coefficient (SE) | F-statistic | DF      | P-value | B coefficient (SE) | F-statistic | DF        | P-value | B coefficient (SE) | F-statistic | DF        | P-value |
| Intercept              | 3.98 (0.02)        | 47093.34    | 1, 2013 | <0.0001 | 4.75 (1.07)        | 19.80       | 1, 2002   | <0.0001 | 4.65 (1.07)        | 19.10       | 1, 2002   | <0.0001 |
| Year (categorical)     |                    |             |         |         |                    | 3.95        | 10, 26117 | <0.0001 |                    | 4.18        | 10, 26116 | <0.0001 |
| Province (categorical) |                    |             |         |         |                    | 13.94       | 11, 26117 | <0.0001 |                    | 13.54       | 11, 26116 | <0.0001 |
| Year*Province          |                    |             |         |         |                    | 2.54        | 53, 26117 | <0.0001 |                    | 2.91        | 53, 26116 | <0.0001 |
| Age                    |                    |             |         |         | 0.03 (0.03)        | 1.04        | 1, 26117  | 0.3089  | 0.04 (0.03)        | 1.29        | 1, 26116  | 0.2558  |
| Sex (M=0; F=1)         |                    |             |         |         | -0.13 (0.03)       | 22.96       | 1, 26117  | <0.0001 | -0.14 (0.03)       | 24.11       | 1, 26116  | <0.0001 |
| EFSL (no=0; yes=1)     |                    |             |         |         | -0.02 (0.04)       | 0.19        | 1, 26117  | 0.6638  | -0.04 (0.04)       | 0.94        | 1, 26116  | 0.3325  |
| SES z-score            |                    |             |         |         |                    |             |           |         | -0.17 (0.02)       | 116.76      | 1, 26116  | <0.0001 |
| Deviance               | 118982.4           |             |         |         | 118334.9           |             |           |         | 118222.1           |             |           |         |
| AIC                    | 118988.4           |             |         |         | 118494.9           |             |           |         | 118384.1           |             |           |         |
| BIC                    | 119005.2           |             |         |         | 118943.5           |             |           |         | 118838.4           |             |           |         |
| Pearson Chi-Square     | 7394.78            |             |         |         | 7475.81            |             |           |         | 7495.20            |             |           |         |

Note the sign (+/-) of correlation coefficients reflects direction of correlation with transformed EDI domain scores (11 – EDI domain scores).  
 DF=degrees of freedom; EFSL=English/French as a second language AIC=Akaike Information Criterion; BIC-Bayesian Information Criterion

**Table S5: Hierarchical Generalized Linear Model (HGLM) for the Social Competence (SC) Domain of the Early Development Instrument (EDI)**

| Parameter              | Model 1            |             |         |         | Model 2            |             |           |         | Model 3            |             |           |         |
|------------------------|--------------------|-------------|---------|---------|--------------------|-------------|-----------|---------|--------------------|-------------|-----------|---------|
|                        | B coefficient (SE) | F-statistic | Df      | P-value | B coefficient (SE) | F-statistic | Df        | P-value | B coefficient (SE) | F-statistic | Df        | P-value |
| Intercept              | 5.31 (0.02)        | 62975.90    | 1, 2014 | <0.0001 | 4.62 (1.26)        | 13.47       | 1, 2004   | 0.0003  | 4.46 (1.25)        | 12.67       | 1, 2003   | 0.0004  |
| Year (categorical)     |                    |             |         |         |                    | 2.83        | 10, 26106 | 0.0016  |                    | 2.56        | 10, 26106 | 0.0043  |
| Province (categorical) |                    |             |         |         |                    | 10.27       | 11, 26106 | <0.0001 |                    | 10.25       | 11, 26106 | <0.0001 |
| Year*Province          |                    |             |         |         |                    | 2.76        | 53, 26106 | <0.0001 |                    | 2.76        | 53, 26106 | <0.0001 |
| Age                    |                    |             |         |         | 0.13 (0.04)        | 8.99        | 1, 26106  | 0.0027  | 0.13 (0.04)        | 10.12       | 1, 26106  | 0.0015  |
| Sex (M=0; F=1)         |                    |             |         |         | -0.75 (0.04)       | 439.63      | 1, 26106  | <0.0001 | -0.76 (0.04)       | 447.29      | 1, 26106  | <0.0001 |
| EFSL (no=0; yes=1)     |                    |             |         |         | 0.12 (0.06)        | 4.82        | 1, 26106  | 0.0284  | 0.10 (0.05)        | 3.07        | 1, 26106  | 0.0798  |
| SES z-score            |                    |             |         |         |                    |             |           |         | -0.17 (0.02)       | 69.10       | 1, 26106  | <0.0001 |
| Deviance               | 134806.2           |             |         |         | 134020.8           |             |           |         | 133955.4           |             |           |         |
| AIC                    | 134812.2           |             |         |         | 134180.8           |             |           |         | 134117.4           |             |           |         |
| BIC                    | 134829.0           |             |         |         | 134629.5           |             |           |         | 134571.7           |             |           |         |
| Pearson Chi-Square     | 6654.52            |             |         |         | 6723.87            |             |           |         | 6736.70            |             |           |         |

Note the sign (+/-) of correlation coefficients reflects direction of correlation with transformed EDI domain scores (11 – EDI domain scores).  
 DF=degrees of freedom; EFSL=English/French as a second language AIC=Akaike Information Criterion; BIC-Bayesian Information Criterion

**Table S6: Hierarchical Generalized Linear Model (HGLM) for the Emotional Maturity (EM) Domain of the Early Development Instrument (EDI)**

| Parameter              | Model 1            |             |         |         | Model 2            |             |           |         | Model 3            |             |           |         |
|------------------------|--------------------|-------------|---------|---------|--------------------|-------------|-----------|---------|--------------------|-------------|-----------|---------|
|                        | B coefficient (SE) | F-statistic | Df      | P-value | B coefficient (SE) | F-statistic | Df        | P-value | B coefficient (SE) | F-statistic | Df        | P-value |
| Intercept              | 4.88 (0.02)        | 47093.34    | 1, 2014 | <0.0001 | 4.28 (0.96)        | 19.71       | 1, 2003   | <0.0001 | 4.18 (0.95)        | 19.00       | 1, 2003   | <0.0001 |
| Year (categorical)     |                    |             |         |         |                    | 2.68        | 10, 25974 | 0.0029  |                    | 2.42        | 10, 25793 | <0.0001 |
| Province (categorical) |                    |             |         |         |                    | 9.22        | 11, 25974 | <0.0001 |                    | 9.04        | 11, 25793 | <0.0001 |
| Year*Province          |                    |             |         |         |                    | 2.12        | 53, 25974 | <0.0001 |                    | 2.06        | 53, 25793 | <0.0001 |
| Age                    |                    |             |         |         | 0.08 (0.03)        | 6.17        | 1, 25974  | 0.0130  | 0.08 (0.03)        | 6.63        | 1, 25793  | 0.0101  |
| Sex (M=0; F=1)         |                    |             |         |         | -0.81 (0.03)       | 970.94      | 1, 25974  | <0.0001 | -0.81 (0.03)       | 969.06      | 1, 25793  | <0.0001 |
| EFSL (no=0; yes=1)     |                    |             |         |         | -0.11 (0.04)       | 7.29        | 1, 25974  | 0.0070  | -0.12 (0.04)       | 10.01       | 1, 25793  | 0.0016  |
| SES z-score            |                    |             |         |         |                    |             |           |         | -0.12 (0.01)       | 65.82       | 1, 25793  | <0.0001 |
| Deviance               | 119448.7           |             |         |         | 118202.7           |             |           |         | 118136.1           |             |           |         |
| AIC                    | 119454.7           |             |         |         | 118362.7           |             |           |         | 118298.1           |             |           |         |
| BIC                    | 119471.6           |             |         |         | 118811.3           |             |           |         | 118752.3           |             |           |         |
| Pearson Chi-Square     | 4465.48            |             |         |         | 4421.32            |             |           |         | 4428.30            |             |           |         |

Note the sign (+/-) of correlation coefficients reflects direction of correlation with transformed EDI domain scores (11 – EDI domain scores).  
 DF=degrees of freedom; EFSL=English/French as a second language AIC=Akaike Information Criterion; BIC-Bayesian Information Criterion

**Table S7: Hierarchical Generalized Linear Model (HGLM) for the Language & Cognitive Development (LCD) Domain of the Early Development Instrument (EDI)**

| Parameter              | Model 1            |             |         |         | Model 2            |             |           |         | Model 3            |             |           |         |
|------------------------|--------------------|-------------|---------|---------|--------------------|-------------|-----------|---------|--------------------|-------------|-----------|---------|
|                        | B coefficient (SE) | F-statistic | Df      | P-value | B coefficient (SE) | F-statistic | Df        | P-value | B coefficient (SE) | F-statistic | Df        | P-value |
| Intercept              | 4.82 (0.02)        | 37229.70    | 1, 2014 | <0.0001 | 4.36 (1.33)        | 10.69       | 1, 2003   | 0.0011  | 4.17 (1.33)        | 9.80        | 1, 2003   | 0.0017  |
| Year (categorical)     |                    |             |         |         |                    | 3.78        | 10, 26022 | 0.0029  |                    | 3.49        | 10, 26021 | <0.0001 |
| Province (categorical) |                    |             |         |         |                    | 6.32        | 11, 26022 | <0.0001 |                    | 7.01        | 11, 26021 | <0.0001 |
| Year*Province          |                    |             |         |         |                    | 2.13        | 53, 26022 | <0.0001 |                    | 2.28        | 53, 26021 | <0.0001 |
| Age                    |                    |             |         |         | -0.11 (0.04)       | 6.34        | 1, 26022  | 0.0118  | -0.10 (0.04)       | 5.01        | 1, 26021  | 0.0252  |
| Sex (M=0; F=1)         |                    |             |         |         | -0.13 (0.04)       | 10.35       | 1, 26022  | 0.0013  | -0.13 (0.04)       | 10.42       | 1, 26021  | 0.0013  |
| EFSL (no=0; yes=1)     |                    |             |         |         | 0.48 (0.06)        | 58.32       | 1, 26022  | <0.0001 | 0.43 (0.06)        | 47.13       | 1, 26021  | <0.0001 |
| SES z-score            |                    |             |         |         |                    |             |           |         | -0.29 (0.02)       | 160.80      | 1, 26021  | <0.0001 |
| Deviance               | 135595.0           |             |         |         | 135045.0           |             |           |         | 134891.0           |             |           |         |
| AIC                    | 135601.0           |             |         |         | 135205.0           |             |           |         | 135053.0           |             |           |         |
| BIC                    | 135617.8           |             |         |         | 135653.7           |             |           |         | 135507.3           |             |           |         |
| Pearson Chi-Square     | 10372.47           |             |         |         | 10458.52           |             |           |         | 10531.822          |             |           |         |

Note the sign (+/-) of correlation coefficients reflects direction of correlation with transformed EDI domain scores (11 – EDI domain scores).

DF=degrees of freedom; EFSL=English/French as a second language AIC=Akaike Information Criterion; BIC-Bayesian Information Criterion

**Table S8: Hierarchical Generalized Linear Model (HGLM) for the Communication Skills & General Knowledge (CSGK) Domain of the Early Development Instrument (EDI)**

| Parameter              | Model 1            |             |         |         | Model 2            |             |           |         | Model 3            |             |           |         |
|------------------------|--------------------|-------------|---------|---------|--------------------|-------------|-----------|---------|--------------------|-------------|-----------|---------|
|                        | B coefficient (SE) | F-statistic | Df      | P-value | B coefficient (SE) | F-statistic | Df        | P-value | B coefficient (SE) | F-statistic | Df        | P-value |
| Intercept              | 6.65 (0.03)        | 63312.62    | 1, 2014 | <0.0001 | 6.11 (1.78)        | 11.76       | 1, 2003   | 0.0006  | 4.65 (1.07)        | 19.10       | 1, 2002   | 0.0007  |
| Year (categorical)     |                    |             |         |         |                    | 3.95        | 10, 26141 | 0.0247  |                    | 1.74        | 10, 26140 | 0.0657  |
| Province (categorical) |                    |             |         |         |                    | 13.94       | 11, 26141 | <0.0001 |                    | 5.94        | 11, 26140 | <0.0001 |
| Year*Province          |                    |             |         |         |                    | 2.54        | 53, 26141 | 0.0109  |                    | 1.51        | 53, 26140 | 0.0094  |
| Age                    |                    |             |         |         | 0.13 (0.06)        | 2.05        | 1, 26141  | 0.0258  | 0.13 (0.05)        | 5.19        | 1, 26140  | 0.0227  |
| Sex (M=0; F=1)         |                    |             |         |         | -0.42 (0.05)       | 7.24        | 1, 26141  | <0.0001 | -0.43 (0.05)       | 70.12       | 1, 26140  | <0.0001 |
| EFSL (no=0; yes=1)     |                    |             |         |         | 1.15 (0.08)        | 1.50        | 1, 26141  | <0.0001 | 1.11 (0.08)        | 173.86      | 1, 26140  | <0.0001 |
| SES z-score            |                    |             |         |         |                    |             |           |         | -0.19 (0.02)       | 55.05       | 1, 26140  | <0.0001 |
| Deviance               | 151991.9           |             |         |         | 151438.8           |             |           |         | 151384.1           |             |           |         |
| AIC                    | 151997.9           |             |         |         | 151598.8           |             |           |         | 151544.1           |             |           |         |
| BIC                    | 152014.7           |             |         |         | 152047.5           |             |           |         | 151992.8           |             |           |         |
| Pearson Chi-Square     | 6272.57            |             |         |         | 6810.50            |             |           |         | 6817.77            |             |           |         |

Note the sign (+/-) of correlation coefficients reflects direction of correlation with transformed EDI domain scores (11 – EDI domain scores).

DF=degrees of freedom; EFSL=English/French as a second language AIC=Akaike Information Criterion; BIC-Bayesian Information Criterion

**Table S9: Goodness-of-fit of different distributions and link functions for the social competence domain**

| Domain                                          | Goodness-of-fit statistics | Identity link |          |          | Log link    |          |          |
|-------------------------------------------------|----------------------------|---------------|----------|----------|-------------|----------|----------|
|                                                 |                            | Exponential   | Gamma    | Normal   | Exponential | Gamma    | Normal   |
| Physical health & wellbeing (PHWB)              | AIC                        | 134241.6      | 118384.1 | 121141.6 | 134240.4    | 118399.9 | 121147.4 |
|                                                 | BIC                        | 134684.7      | 118838.4 | 121595.8 | 134683.5    | 118854.2 | 121601.6 |
| Social competence (SC)                          | AIC                        | 150247.6      | 113417.4 | 133234.4 | 150247.5    | 134128.9 | NC       |
|                                                 | BIC                        | 150690.7      | 134571.7 | 133688.7 | 150690.6    | 134583.2 | NC       |
| Emotional maturity (EM)                         | AIC                        | 144859.5      | 118298.1 | 116476.9 | 144859.8    | 118310   | NC       |
|                                                 | BIC                        | 145302.6      | 118752.3 | 116931.2 | 145302.8    | 118764.3 | NC       |
| Language & cognitive development (LCD)          | AIC                        | 144457.3      | 135053.0 | 140742   | 144457.1    | 135069.7 | 140754.4 |
|                                                 | BIC                        | 144900.3      | 135507.3 | 141196.3 | 144900.2    | 135524   | 141208.7 |
| Communication skills & general knowledge (CSGK) | AIC                        | 163276.5      | 151544.1 | 146002.4 | 163274.7    | 151539.4 | NC       |
|                                                 | BIC                        | 163719.5      | 151992.8 | 146456.7 | 163717.8    | 151988.1 | NC       |

AIC=Akaike information criterion; BIC=Bayesian information criterion; NC=not converged

**Table S10: Hierarchical Generalized Linear Model (HGLM) for the Physical Health & Wellbeing (PHWB) Domain of the Early Development Instrument (EDI) excluding outlying and influential cases (n = 687 excluded)**

|                               | <b>B coefficient (SE)</b> | <b>F-statistic</b> | <b>Df</b> | <b>P-value</b> |
|-------------------------------|---------------------------|--------------------|-----------|----------------|
| <b>Intercept</b>              | 4.70 (1.03)               | 20.70              | 1, 1999   | <0.0001        |
| <b>Year (categorical)</b>     |                           | 6.03               | 10, 25432 | <0.0001        |
| <b>Province (categorical)</b> |                           | 19.14              | 11, 25432 | <0.0001        |
| <b>Year*Province</b>          |                           | 4.14               | 53, 25432 | <0.0001        |
| <b>Age</b>                    | 0.02 (0.03)               | 0.63               | 1, 25432  | 0.4265         |
| <b>Sex (M=0; F=1)</b>         | -0.21 (0.03)              | 60.10              | 1, 25432  | <0.0001        |
| <b>EFSL (no=0; yes=1)</b>     | -0.09 (0.04)              | 5.07               | 1, 25432  | 0.0243         |
| <b>SES z-score</b>            | -0.19 (0.02)              | 4.14               | 1, 25432  | <0.0001        |

EFSL=English/French as a second language; Df=degrees of freedom



**Table S11: Hierarchical Generalized Linear Model (HGLM) for the Social Competence (SC) Domain of the Early Development Instrument (EDI) excluding outlying and influential cases (n = 317 excluded)**

|                               | <b>B coefficient (SE)</b> | <b>F-statistic</b> | <b>Df</b> | <b>P-value</b> |
|-------------------------------|---------------------------|--------------------|-----------|----------------|
| <b>Intercept</b>              | 4.54 (1.24)               | 13.47              | 1, 2002   | 0.0003         |
| <b>Year (categorical)</b>     |                           | 5.26               | 10, 25790 | <0.0001        |
| <b>Province (categorical)</b> |                           | 14.83              | 11, 25790 | <0.0001        |
| <b>Year*Province</b>          |                           | 4.43               | 53, 25790 | <0.0001        |
| <b>Age</b>                    | 0.13 (0.04)               | 9.48               | 1, 25790  | 0.0021         |
| <b>Sex (M=0; F=1)</b>         | -0.94 (0.03)              | 736.81             | 1, 25790  | <0.0001        |
| <b>EFSL (no=0; yes=1)</b>     | 0.07 (0.05)               | 1.74               | 1, 25790  | 0.1862         |
| <b>SES z-score</b>            | -0.18 (0.02)              | 86.23              | 1, 25790  | <0.0001        |

EFSL=English/French as a second language; Df=degrees of freedom

**Table S12: Hierarchical Generalized Linear Model (HGLM) for the Emotional Maturity (EM) Domain of the Early Development Instrument (EDI) excluding outlying and influential cases (n = 409 excluded)**

|                               | <b>B coefficient (SE)</b> | <b>F-statistic</b> | <b>Df</b> | <b>P-value</b> |
|-------------------------------|---------------------------|--------------------|-----------|----------------|
| <b>Intercept</b>              | 3.36 (0.91)               | 13.54              | 1, 2001   | 0.0002         |
| <b>Year (categorical)</b>     |                           | 3.84               | 10, 25566 | <0.0001        |
| <b>Province (categorical)</b> |                           | 12.32              | 11, 25566 | <0.0001        |
| <b>Year*Province</b>          |                           | 3.04               | 53, 25566 | <0.0001        |
| <b>Age</b>                    | 0.10 (0.03)               | 10.68              | 1, 25566  | 0.0011         |
| <b>Sex (M=0; F=1)</b>         | -0.91 (0.03)              | 1307.36            | 1, 25566  | <0.0001        |
| <b>EFSL (no=0; yes=1)</b>     | -0.13 (0.04)              | 11.97              | 1, 25566  | 0.0005         |
| <b>SES z-score</b>            | -0.14 (0.01)              | 88.74              | 1, 25566  | <0.0001        |

EFSL=English/French as a second language; Df=degrees of freedom

**Table S13: Hierarchical Generalized Linear Model (HGLM) for the Language & Cognitive Development (LCD) Domain of the Early Development Instrument (EDI) excluding outlying and influential cases (n = 619 excluded)**

|                               | <b>B coefficient (SE)</b> | <b>F-statistic</b> | <b>Df</b> | <b>P-value</b> |
|-------------------------------|---------------------------|--------------------|-----------|----------------|
| <b>Intercept</b>              | 3.43 (1.27)               | 12.11              | 1, 2002   | 0.0005         |
| <b>Year (categorical)</b>     |                           | 5.87               | 10, 25403 | <0.0001        |
| <b>Province (categorical)</b> |                           | 13.29              | 11, 25403 | <0.0001        |
| <b>Year*Province</b>          |                           | 4.16               | 53, 25403 | <0.0001        |
| <b>Age</b>                    | -0.20 (0.04)              | 22.42              | 1, 25403  | <0.0001        |
| <b>Sex (M=0; F=1)</b>         | -0.23 (0.04)              | 36.93              | 1, 25403  | <0.0001        |
| <b>EFSL (no=0; yes=1)</b>     | 0.50 (0.06)               | 67.66              | 1, 25403  | <0.0001        |
| <b>SES z-score</b>            | -0.39 (0.02)              | 278.45             | 1, 25403  | <0.0001        |

EFSL=English/French as a second language; Df=degrees of freedom

**Table S14: Hierarchical Generalized Linear Model (HGLM) for the Communication Skills & General Knowledge (CSGK) Domain of the Early Development Instrument (EDI) excluding outlying and influential cases (n = 2 excluded)**

|                               | <b>B coefficient (SE)</b> | <b>F-statistic</b> | <b>Df</b> | <b>P-value</b> |
|-------------------------------|---------------------------|--------------------|-----------|----------------|
| <b>Intercept</b>              | 6.02 (1.78)               | 11.49              | 1, 2002   | 0.0007         |
| <b>Year (categorical)</b>     |                           | 1.81               | 10, 26139 | 0.0527         |
| <b>Province (categorical)</b> |                           | 7.35               | 11, 26139 | <0.0001        |
| <b>Year*Province</b>          |                           | 1.63               | 53, 26139 | 0.0027         |
| <b>Age</b>                    | 0.13 (0.06)               | 5.09               | 1, 26139  | 0.0241         |
| <b>Sex (M=0; F=1)</b>         | -0.43 (0.05)              | 71.08              | 1, 26139  | <0.0001        |
| <b>EFSL (no=0; yes=1)</b>     | 1.11 (0.08)               | 173.83             | 1, 26139  | <0.0001        |
| <b>SES z-score</b>            | -0.19 (0.03)              | 54.80              | 1, 26139  | <0.0001        |

EFSL=English/French as a second language; Df=degrees of freedom

**STROBE 2007 (v4) Statement—Checklist of items that should be included in reports of *cross-sectional studies***

| Section/Topic                | Item # | Recommendation                                                                                                                                                                       | Reported on page #        |
|------------------------------|--------|--------------------------------------------------------------------------------------------------------------------------------------------------------------------------------------|---------------------------|
| <b>Title and abstract</b>    | 1      | (a) Indicate the study's design with a commonly used term in the title or the abstract                                                                                               | 1                         |
|                              |        | (b) Provide in the abstract an informative and balanced summary of what was done and what was found                                                                                  | 2                         |
| <b>Introduction</b>          |        |                                                                                                                                                                                      |                           |
| Background/rationale         | 2      | Explain the scientific background and rationale for the investigation being reported                                                                                                 | 4-5                       |
| Objectives                   | 3      | State specific objectives, including any prespecified hypotheses                                                                                                                     | 5                         |
| <b>Methods</b>               |        |                                                                                                                                                                                      |                           |
| Study design                 | 4      | Present key elements of study design early in the paper                                                                                                                              | 5                         |
| Setting                      | 5      | Describe the setting, locations, and relevant dates, including periods of recruitment, exposure, follow-up, and data collection                                                      | 5-6                       |
| Participants                 | 6      | (a) Give the eligibility criteria, and the sources and methods of selection of participants                                                                                          | 5                         |
| Variables                    | 7      | Clearly define all outcomes, exposures, predictors, potential confounders, and effect modifiers. Give diagnostic criteria, if applicable                                             | 5-6                       |
| Data sources/<br>measurement | 8*     | For each variable of interest, give sources of data and details of methods of assessment (measurement). Describe comparability of assessment methods if there is more than one group | 5-6                       |
| Bias                         | 9      | Describe any efforts to address potential sources of bias                                                                                                                            | NA                        |
| Study size                   | 10     | Explain how the study size was arrived at                                                                                                                                            | NA; population-level data |
| Quantitative variables       | 11     | Explain how quantitative variables were handled in the analyses. If applicable, describe which groupings were chosen and why                                                         | 6-7                       |
| Statistical methods          | 12     | (a) Describe all statistical methods, including those used to control for confounding                                                                                                | 6-7                       |
|                              |        | (b) Describe any methods used to examine subgroups and interactions                                                                                                                  | NA                        |
|                              |        | (c) Explain how missing data were addressed                                                                                                                                          | 7                         |
|                              |        | (d) If applicable, describe analytical methods taking account of sampling strategy                                                                                                   | 6                         |
|                              |        | (e) Describe any sensitivity analyses                                                                                                                                                | 7                         |

| <b>Results</b>   |     |                                                                                                                                                                                                              |                                                                                                                                                                                                                                                                                                               |
|------------------|-----|--------------------------------------------------------------------------------------------------------------------------------------------------------------------------------------------------------------|---------------------------------------------------------------------------------------------------------------------------------------------------------------------------------------------------------------------------------------------------------------------------------------------------------------|
| Participants     | 13* | (a) Report numbers of individuals at each stage of study—eg numbers potentially eligible, examined for eligibility, confirmed eligible, included in the study, completing follow-up, and analysed            | NA; population-level database.                                                                                                                                                                                                                                                                                |
|                  |     | (b) Give reasons for non-participation at each stage                                                                                                                                                         | NA; population-level database.                                                                                                                                                                                                                                                                                |
|                  |     | (c) Consider use of a flow diagram                                                                                                                                                                           | NA                                                                                                                                                                                                                                                                                                            |
| Descriptive data | 14* | (a) Give characteristics of study participants (eg demographic, clinical, social) and information on exposures and potential confounders                                                                     | Tables 1 and 2                                                                                                                                                                                                                                                                                                |
|                  |     | (b) Indicate number of participants with missing data for each variable of interest                                                                                                                          | Table S3                                                                                                                                                                                                                                                                                                      |
| Outcome data     | 15* | Report numbers of outcome events or summary measures                                                                                                                                                         |                                                                                                                                                                                                                                                                                                               |
| Main results     | 16  | (a) Give unadjusted estimates and, if applicable, confounder-adjusted estimates and their precision (eg, 95% confidence interval). Make clear which confounders were adjusted for and why they were included | Table 3<br><br>Although unadjusted estimates are not presented, VIF statistics were very low, indicating that predictor variables were not correlated with one another. When there is little to no correlation between predictor variables, unadjusted and adjusted effect estimates are likely very similar. |
|                  |     | (b) Report category boundaries when continuous variables were categorized                                                                                                                                    | NA                                                                                                                                                                                                                                                                                                            |
|                  |     | (c) If relevant, consider translating estimates of relative risk into absolute risk for a meaningful time period                                                                                             | NA                                                                                                                                                                                                                                                                                                            |
| Other analyses   | 17  | Report other analyses done—eg analyses of subgroups and interactions, and sensitivity analyses                                                                                                               | 9                                                                                                                                                                                                                                                                                                             |

|                          |    |                                                                                                                                                                            |       |
|--------------------------|----|----------------------------------------------------------------------------------------------------------------------------------------------------------------------------|-------|
| <b>Discussion</b>        |    |                                                                                                                                                                            |       |
| Key results              | 18 | Summarise key results with reference to study objectives                                                                                                                   | 9     |
| Limitations              | 19 | Discuss limitations of the study, taking into account sources of potential bias or imprecision. Discuss both direction and magnitude of any potential bias                 | 11-12 |
| Interpretation           | 20 | Give a cautious overall interpretation of results considering objectives, limitations, multiplicity of analyses, results from similar studies, and other relevant evidence | 10-13 |
| Generalisability         | 21 | Discuss the generalisability (external validity) of the study results                                                                                                      | 12-13 |
| <b>Other information</b> |    |                                                                                                                                                                            |       |
| Funding                  | 22 | Give the source of funding and the role of the funders for the present study and, if applicable, for the original study on which the present article is based              | 13    |

\*Give information separately for cases and controls in case-control studies and, if applicable, for exposed and unexposed groups in cohort and cross-sectional studies.

**Note:** An Explanation and Elaboration article discusses each checklist item and gives methodological background and published examples of transparent reporting. The STROBE checklist is best used in conjunction with this article (freely available on the Web sites of PLoS Medicine at <http://www.plosmedicine.org/>, Annals of Internal Medicine at <http://www.annals.org/>, and Epidemiology at <http://www.epidem.com/>). Information on the STROBE Initiative is available at [www.strobe-statement.org](http://www.strobe-statement.org).
