# Supplementary material for: Socioeconomic gradient in the developmental health of Canadian children with disabilities at school entry: a cross-sectional study
Source: PubMed Central journal article supplement — BMJ Open. 2020 Apr 28;10(4):e032396. doi: 10.1136/bmjopen-2019-032396 (PMC7213855; doi:10.1136/bmjopen-2019-032396), 2020-04-28
Supplement: bmjopen-2019-032396supp001.pdf [file bmjopen-2019-032396supp001.pdf]

**Table S1: Variables included in the Canadian Neighbourhoods and Early Child Development (CanNECD) socioeconomic status (SES) index**

|                              |                                                                                    |
|------------------------------|------------------------------------------------------------------------------------|
| <b>Education</b>             | % with no high school diploma                                                      |
| <b>Language/Immigration</b>  | % not speaking either official language at home                                    |
| <b>Marital Status</b>        | % separated or divorced                                                            |
| <b>Wealth</b>                | % with investment income, families with children under 6                           |
| <b>High Income</b>           | % with incomes $\geq$ twice than provincial median, families with children under 6 |
| <b>Dues</b>                  | % with union/association dues, families with children under 6                      |
| <b>Social Capital</b>        | % with charitable donations, families with children under 6                        |
| <b>Poverty</b>               | % with low income, lone parent families with children under 6                      |
| <b>Residential Stability</b> | % non-migrant movers in the past year                                              |
| <b>Income Inequality</b>     | Gini Coefficient, lone female families with children under 6                       |

**Table S2: Descriptive characteristics of neighborhoods excluded from analysis (n=40)**

| <b>Province</b>                                              | <b>Number of neighborhoods (%)</b> |
|--------------------------------------------------------------|------------------------------------|
| <b>Alberta</b>                                               | 8 (20)                             |
| <b>New Brunswick</b>                                         | 4 (10)                             |
| <b>Ontario</b>                                               | 5 (12.5)                           |
| <b>Quebec</b>                                                | 23 (57.5)                          |
| <b>Median (IQR) number of children in each neighbourhood</b> | 83 (56-141)                        |
| <b>Mean (SD) of standardized SES index</b>                   | 0.38 (0.88)                        |

**Table S3: Descriptive characteristics of population of children with missing Physical Health & Wellbeing (PHWB) scores (n=446)**

|                                    | PHWB         | SC          | EM          | LCD         | CSGK        |
|------------------------------------|--------------|-------------|-------------|-------------|-------------|
| <b>Sex</b>                         | <b>N (%)</b> |             |             |             |             |
| Female                             | 123 (27.6)   | 138 (30.5)  | 166 (27.7)  | 154 (28.4)  | 128 (30.4)  |
| Male                               | 318 (71.3)   | 311 (68.7)  | 429 (71.5)  | 384 (70.8)  | 289 (68.6)  |
| Missing                            | 5 (1.1)      | 4 (0.9)     | 5 (0.8)     | 4 (0.7)     | 4 (1.0)     |
| <b>Age</b>                         | <b>N (%)</b> |             |             |             |             |
| Mean (SD)                          | 5.78 (0.40)  | 5.73 (0.4)  | 5.78 (0.4)  | 5.76 (0.4)  | 5.76 (0.41) |
| Missing                            | 7 (1.57)     | 6 (1.3)     | 8 (1.3)     | 6 (1.1)     | 7 (1.66)    |
| <b>EFSL Status</b>                 | <b>N (%)</b> |             |             |             |             |
| Yes                                | 61 (13.7)    | 61 (13.5)   | 76 (12.7)   | 77 (14.2)   | 59 (14.0)   |
| No                                 | 379 (85.0)   | 386 (85.2)  | 511 (85.2)  | 457 (84.3)  | 355 (84.3)  |
| Missing                            | 6 (1.3)      | 6 (1.3)     | 13 (2.2)    | 8 (1.5)     | 7 (1.7)     |
| <b>Province</b>                    | <b>N (%)</b> |             |             |             |             |
| Alberta                            | 82 (18.4)    | 84 (18.5)   | 92 (15.3)   | 91 (16.8)   | 85 (20.2)   |
| British Columbia                   | 9 (2.0)      | 17 (3.8)    | 41 (6.8)    | 45 (8.3)    | 7 (1.7)     |
| Manitoba                           | 122 (27.4)   | 117 (25.8)  | 131 (21.8)  | 121 (22.3)  | 113 (26.8)  |
| New Brunswick                      | 1 (0.2)      | 1 (0.2)     | 4 (0.7)     | 1 (0.2)     | 0 (0)       |
| Newfoundland                       | 3 (0.7)      | 6 (1.3)     | 6 (1.0)     | 3 (0.6)     | 5 (1.2)     |
| Nova Scotia                        | 15 (3.4)     | 14 (3.1)    | 20 (3.3)    | 21 (3.9)    | 15 (3.6)    |
| Northwest Territories              | 1 (0.2)      | 1 (0.2)     | 2 (0.3)     | 1 (0.2)     | 1 (0.2)     |
| Ontario                            | 193 (43.3)   | 192 (42.4)  | 241 (40.2)  | 222 (41.0)  | 173 (41.1)  |
| Prince Edward Island               | 0 (0)        | 0 (0)       | 0 (0)       | 1 (0.2)     | 0 (0)       |
| Quebec                             | 5 (1.1)      | 3 (0.7)     | 33 (5.5)    | 15 (2.8)    | 7 (1.7)     |
| Saskatchewan                       | 8 (1.8)      | 13 (2.9)    | 19 (3.2)    | 14 (2.6)    | 10 (2.4)    |
| Yukon                              | 0 (0)        | 0 (0)       | 0 (0)       | 0 (0)       | 0 (0)       |
| <b>Year of data collection</b>     | <b>N (%)</b> |             |             |             |             |
| 2004                               | 3 (0.7)      | 3 (0.7)     | 7 (1.2)     | 3 (0.6)     | 2 (0.5)     |
| 2005                               | 19 (4.3)     | 17 (3.8)    | 29 (4.8)    | 21 (3.9)    | 12 (2.9)    |
| 2006                               | 46 (10.3)    | 44 (9.7)    | 77 (12.8)   | 61 (11.3)   | 46 (10.9)   |
| 2007                               | 26 (5.8)     | 23 (5.1)    | 39 (6.5)    | 32 (5.9)    | 21 (5.0)    |
| 2008                               | 33 (7.4)     | 34 (7.5)    | 43 (7.2)    | 39 (7.2)    | 32 (7.6)    |
| 2009                               | 50 (11.2)    | 55 (12.1)   | 70 (11.7)   | 69 (12.7)   | 43 (10.2)   |
| 2010                               | 51 (11.4)    | 48 (10.6)   | 57 (9.5)    | 58 (10.7)   | 43 (10.2)   |
| 2011                               | 96 (21.5)    | 96 (21.2)   | 113 (18.8)  | 113 (20.8)  | 97 (23.0)   |
| 2012                               | 51 (11.4)    | 56 (12.4)   | 80 (13.3)   | 67 (12.4)   | 53 (12.6)   |
| 2013                               | 71 (15.9)    | 74 (16.3)   | 84 (14.0)   | 79 (14.6)   | 72 (17.1)   |
| 2014                               | 0 (0)        | 3 (0.7)     | 1 (0.2)     | 0 (0)       | 0 (0)       |
| <b>Mean (SD) EDI domain scores</b> |              |             |             |             |             |
| PHWB                               | NA           | 5.06 (2.17) | 6.70 (2.33) | 6.82 (2.09) | 7.71 (1.96) |
| SC                                 | 5.42 (2.97)  | NA          | 5.47 (2.54) | 4.78 (2.33) | 5.97 (2.98) |
| EM                                 | 5.90 (2.53)  | 5.42 (1.44) | NA          | 5.65 (1.89) | 6.31 (1.36) |
| LCD                                | 5.39 (3.31)  | 1.98 (2.38) | 5.51 (3.15) | NA          | 6.29 (3.46) |
| CSGK                               | 3.80 (3.34)  | 0.86 (1.91) | 3.77 (3.06) | 2.93 (2.74) | NA          |

PHWB=Physical health & wellbeing; SC=Social competence; EM=Emotional maturity; LCD=Language & cognitive development; CSGK=communication skills & general knowledge

**Table S4: Hierarchical Generalized Linear Model (HGLM) for the Physical Health & Wellbeing (PHWB) main of the Early Development Instrument (EDI)**

| Parameter                     | Model 1            |             |         |         | Model 2            |             |           |         | Model 3            |             |           |         |
|-------------------------------|--------------------|-------------|---------|---------|--------------------|-------------|-----------|---------|--------------------|-------------|-----------|---------|
|                               | B coefficient (SE) | F-statistic | DF      | P-value | B coefficient (SE) | F-statistic | DF        | P-value | B coefficient (SE) | F-statistic | DF        | P-value |
| <b>Intercept</b>              | 3.98 (0.02)        | 47093.34    | 1, 2013 | <0.0001 | 4.75 (1.07)        | 19.80       | 1, 2002   | <0.0001 | 4.65 (1.07)        | 19.10       | 1, 2002   | <0.0001 |
| <b>Year (categorical)</b>     |                    |             |         |         |                    | 3.95        | 10, 26117 | <0.0001 |                    | 4.18        | 10, 26116 | <0.0001 |
| <b>Province (categorical)</b> |                    |             |         |         |                    | 13.94       | 11, 26117 | <0.0001 |                    | 13.54       | 11, 26116 | <0.0001 |
| <b>Year*Province</b>          |                    |             |         |         |                    | 2.54        | 53, 26117 | <0.0001 |                    | 2.91        | 53, 26116 | <0.0001 |
| <b>Age</b>                    |                    |             |         |         | 0.03 (0.03)        | 1.04        | 1, 26117  | 0.3089  | 0.04 (0.03)        | 1.29        | 1, 26116  | 0.2558  |
| <b>Sex (M=0; F=1)</b>         |                    |             |         |         | -0.13 (0.03)       | 22.96       | 1, 26117  | <0.0001 | -0.14 (0.03)       | 24.11       | 1, 26116  | <0.0001 |
| <b>EFSL (no=0; yes=1)</b>     |                    |             |         |         | -0.02 (0.04)       | 0.19        | 1, 26117  | 0.6638  | -0.04 (0.04)       | 0.94        | 1, 26116  | 0.3325  |
| <b>SES z-score</b>            |                    |             |         |         |                    |             |           |         | -0.17 (0.02)       | 116.76      | 1, 26116  | <0.0001 |
| <b>Deviance</b>               | 118982.4           |             |         |         | 118334.9           |             |           |         | 118222.1           |             |           |         |
| <b>AIC</b>                    | 118988.4           |             |         |         | 118494.9           |             |           |         | 118384.1           |             |           |         |
| <b>BIC</b>                    | 119005.2           |             |         |         | 118943.5           |             |           |         | 118838.4           |             |           |         |
| <b>Pearson Chi-Square</b>     | 7394.78            |             |         |         | 7475.81            |             |           |         | 7495.20            |             |           |         |

Note the sign (+/-) of correlation coefficients reflects direction of correlation with transformed EDI domain scores (11 – EDI domain scores).  
 DF=degrees of freedom; EFSL=English/French as a second language AIC=Akaike Information Criterion; BIC=Bayesian Information Criterion

**Table S5: Hierarchical Generalized Linear Model (HGLM) for the Social Competence (SC) Domain of the Early Development Instrument (EDI)**

| Parameter                     | Model 1            |             |         |         | Model 2            |             |           |         | Model 3            |             |           |         |
|-------------------------------|--------------------|-------------|---------|---------|--------------------|-------------|-----------|---------|--------------------|-------------|-----------|---------|
|                               | B coefficient (SE) | F-statistic | Df      | P-value | B coefficient (SE) | F-statistic | Df        | P-value | B coefficient (SE) | F-statistic | Df        | P-value |
| <b>Intercept</b>              | 5.31 (0.02)        | 62975.90    | 1, 2014 | <0.0001 | 4.62 (1.26)        | 13.47       | 1, 2004   | 0.0003  | 4.46 (1.25)        | 12.67       | 1, 2003   | 0.0004  |
| <b>Year (categorical)</b>     |                    |             |         |         |                    | 2.83        | 10, 26106 | 0.0016  |                    | 2.56        | 10, 26106 | 0.0043  |
| <b>Province (categorical)</b> |                    |             |         |         |                    | 10.27       | 11, 26106 | <0.0001 |                    | 10.25       | 11, 26106 | <0.0001 |
| <b>Year*Province</b>          |                    |             |         |         |                    | 2.76        | 53, 26106 | <0.0001 |                    | 2.76        | 53, 26106 | <0.0001 |
| <b>Age</b>                    |                    |             |         |         | 0.13 (0.04)        | 8.99        | 1, 26106  | 0.0027  | 0.13 (0.04)        | 10.12       | 1, 26106  | 0.0015  |
| <b>Sex (M=0; F=1)</b>         |                    |             |         |         | -0.75 (0.04)       | 439.63      | 1, 26106  | <0.0001 | -0.76 (0.04)       | 447.29      | 1, 26106  | <0.0001 |
| <b>EFSL (no=0; yes=1)</b>     |                    |             |         |         | 0.12 (0.06)        | 4.82        | 1, 26106  | 0.0284  | 0.10 (0.05)        | 3.07        | 1, 26106  | 0.0798  |
| <b>SES z-score</b>            |                    |             |         |         |                    |             |           |         | -0.17 (0.02)       | 69.10       | 1, 26106  | <0.0001 |
| <b>Deviance</b>               | 134806.2           |             |         |         | 134020.8           |             |           |         | 133955.4           |             |           |         |
| <b>AIC</b>                    | 134812.2           |             |         |         | 134180.8           |             |           |         | 134117.4           |             |           |         |
| <b>BIC</b>                    | 134829.0           |             |         |         | 134629.5           |             |           |         | 134571.7           |             |           |         |
| <b>Pearson Chi-Square</b>     | 6654.52            |             |         |         | 6723.87            |             |           |         | 6736.70            |             |           |         |

Note the sign (+/-) of correlation coefficients reflects direction of correlation with transformed EDI domain scores (11 – EDI domain scores).  
 DF=degrees of freedom; EFSL=English/French as a second language AIC=Akaike Information Criterion; BIC=Bayesian Information Criterion

**Table S6: Hierarchical Generalized Linear Model (HGLM) for the Emotional Maturity (EM) Domain of the Early Development Instrument (EDI)**

| Parameter                     | Model 1            |             |         |         | Model 2            |             |           |         | Model 3            |             |           |         |
|-------------------------------|--------------------|-------------|---------|---------|--------------------|-------------|-----------|---------|--------------------|-------------|-----------|---------|
|                               | B coefficient (SE) | F-statistic | Df      | P-value | B coefficient (SE) | F-statistic | Df        | P-value | B coefficient (SE) | F-statistic | Df        | P-value |
| <b>Intercept</b>              | 4.88 (0.02)        | 47093.34    | 1, 2014 | <0.0001 | 4.28 (0.96)        | 19.71       | 1, 2003   | <0.0001 | 4.18 (0.95)        | 19.00       | 1, 2003   | <0.0001 |
| <b>Year (categorical)</b>     |                    |             |         |         |                    | 2.68        | 10, 25974 | 0.0029  |                    | 2.42        | 10, 25793 | <0.0001 |
| <b>Province (categorical)</b> |                    |             |         |         |                    | 9.22        | 11, 25974 | <0.0001 |                    | 9.04        | 11, 25793 | <0.0001 |
| <b>Year*Province</b>          |                    |             |         |         |                    | 2.12        | 53, 25974 | <0.0001 |                    | 2.06        | 53, 25793 | <0.0001 |
| <b>Age</b>                    |                    |             |         |         | 0.08 (0.03)        | 6.17        | 1, 25974  | 0.0130  | 0.08 (0.03)        | 6.63        | 1, 25793  | 0.0101  |
| <b>Sex (M=0; F=1)</b>         |                    |             |         |         | -0.81 (0.03)       | 970.94      | 1, 25974  | <0.0001 | -0.81 (0.03)       | 969.06      | 1, 25793  | <0.0001 |
| <b>EFSL (no=0; yes=1)</b>     |                    |             |         |         | -0.11 (0.04)       | 7.29        | 1, 25974  | 0.0070  | -0.12 (0.04)       | 10.01       | 1, 25793  | 0.0016  |
| <b>SES z-score</b>            |                    |             |         |         |                    |             |           |         | -0.12 (0.01)       | 65.82       | 1, 25793  | <0.0001 |
| <b>Deviance</b>               | 119448.7           |             |         |         | 118202.7           |             |           |         | 118136.1           |             |           |         |
| <b>AIC</b>                    | 119454.7           |             |         |         | 118362.7           |             |           |         | 118298.1           |             |           |         |
| <b>BIC</b>                    | 119471.6           |             |         |         | 118811.3           |             |           |         | 118752.3           |             |           |         |
| <b>Pearson Chi-Square</b>     | 4465.48            |             |         |         | 4421.32            |             |           |         | 4428.30            |             |           |         |

Note the sign (+/-) of correlation coefficients reflects direction of correlation with transformed EDI domain scores (11 – EDI domain scores).  
 DF=degrees of freedom; EFSL=English/French as a second language AIC=Akaike Information Criterion; BIC=Bayesian Information Criterion

**Table S7: Hierarchical Generalized Linear Model (HGLM) for the Language & Cognitive Development (LCD) Domain of the Early Development Instrument (EDI)**

| Parameter                     | Model 1            |             |         |         | Model 2            |             |           |         | Model 3            |             |           |         |
|-------------------------------|--------------------|-------------|---------|---------|--------------------|-------------|-----------|---------|--------------------|-------------|-----------|---------|
|                               | B coefficient (SE) | F-statistic | Df      | P-value | B coefficient (SE) | F-statistic | Df        | P-value | B coefficient (SE) | F-statistic | Df        | P-value |
| <b>Intercept</b>              | 4.82 (0.02)        | 37229.70    | 1, 2014 | <0.0001 | 4.36 (1.33)        | 10.69       | 1, 2003   | 0.0011  | 4.17 (1.33)        | 9.80        | 1, 2003   | 0.0017  |
| <b>Year (categorical)</b>     |                    |             |         |         |                    | 3.78        | 10, 26022 | 0.0029  |                    | 3.49        | 10, 26021 | <0.0001 |
| <b>Province (categorical)</b> |                    |             |         |         |                    | 6.32        | 11, 26022 | <0.0001 |                    | 7.01        | 11, 26021 | <0.0001 |
| <b>Year*Province</b>          |                    |             |         |         |                    | 2.13        | 53, 26022 | <0.0001 |                    | 2.28        | 53, 26021 | <0.0001 |
| <b>Age</b>                    |                    |             |         |         | -0.11 (0.04)       | 6.34        | 1, 26022  | 0.0118  | -0.10 (0.04)       | 5.01        | 1, 26021  | 0.0252  |
| <b>Sex (M=0; F=1)</b>         |                    |             |         |         | -0.13 (0.04)       | 10.35       | 1, 26022  | 0.0013  | -0.13 (0.04)       | 10.42       | 1, 26021  | 0.0013  |
| <b>EFSL (no=0; yes=1)</b>     |                    |             |         |         | 0.48 (0.06)        | 58.32       | 1, 26022  | <0.0001 | 0.43 (0.06)        | 47.13       | 1, 26021  | <0.0001 |
| <b>SES z-score</b>            |                    |             |         |         |                    |             |           |         | -0.29 (0.02)       | 160.80      | 1, 26021  | <0.0001 |
| <b>Deviance</b>               | 135595.0           |             |         |         | 135045.0           |             |           |         | 134891.0           |             |           |         |
| <b>AIC</b>                    | 135601.0           |             |         |         | 135205.0           |             |           |         | 135053.0           |             |           |         |
| <b>BIC</b>                    | 135617.8           |             |         |         | 135653.7           |             |           |         | 135507.3           |             |           |         |
| <b>Pearson Chi-Square</b>     | 10372.47           |             |         |         | 10458.52           |             |           |         | 10531.822          |             |           |         |

Note the sign (+/-) of correlation coefficients reflects direction of correlation with transformed EDI domain scores (11 – EDI domain scores).  
 DF=degrees of freedom; EFSL=English/French as a second language AIC=Akaike Information Criterion; BIC=Bayesian Information Criterion

**Table S8: Hierarchical Generalized Linear Model (HGLM) for the Communication Skills & General Knowledge (CSGK) Domain of the Early Development Instrument (EDI)**

| Parameter                     | Model 1            |             |         |         | Model 2            |             |           |         | Model 3            |             |           |         |
|-------------------------------|--------------------|-------------|---------|---------|--------------------|-------------|-----------|---------|--------------------|-------------|-----------|---------|
|                               | B coefficient (SE) | F-statistic | Df      | P-value | B coefficient (SE) | F-statistic | Df        | P-value | B coefficient (SE) | F-statistic | Df        | P-value |
| <b>Intercept</b>              | 6.65 (0.03)        | 63312.62    | 1, 2014 | <0.0001 | 6.11 (1.78)        | 11.76       | 1, 2003   | 0.0006  | 4.65 (1.07)        | 19.10       | 1, 2002   | 0.0007  |
| <b>Year (categorical)</b>     |                    |             |         |         |                    | 3.95        | 10, 26141 | 0.0247  |                    | 1.74        | 10, 26140 | 0.0657  |
| <b>Province (categorical)</b> |                    |             |         |         |                    | 13.94       | 11, 26141 | <0.0001 |                    | 5.94        | 11, 26140 | <0.0001 |
| <b>Year*Province</b>          |                    |             |         |         |                    | 2.54        | 53, 26141 | 0.0109  |                    | 1.51        | 53, 26140 | 0.0094  |
| <b>Age</b>                    |                    |             |         |         | 0.13 (0.06)        | 2.05        | 1, 26141  | 0.0258  | 0.13 (0.05)        | 5.19        | 1, 26140  | 0.0227  |
| <b>Sex (M=0; F=1)</b>         |                    |             |         |         | -0.42 (0.05)       | 7.24        | 1, 26141  | <0.0001 | -0.43 (0.05)       | 70.12       | 1, 26140  | <0.0001 |
| <b>EFSL (no=0; yes=1)</b>     |                    |             |         |         | 1.15 (0.08)        | 1.50        | 1, 26141  | <0.0001 | 1.11 (0.08)        | 173.86      | 1, 26140  | <0.0001 |
| <b>SES z-score</b>            |                    |             |         |         |                    |             |           |         | -0.19 (0.02)       | 55.05       | 1, 26140  | <0.0001 |
| <b>Deviance</b>               | 151991.9           |             |         |         | 151438.8           |             |           |         | 151384.1           |             |           |         |
| <b>AIC</b>                    | 151997.9           |             |         |         | 151598.8           |             |           |         | 151544.1           |             |           |         |
| <b>BIC</b>                    | 152014.7           |             |         |         | 152047.5           |             |           |         | 151992.8           |             |           |         |
| <b>Pearson Chi-Square</b>     | 6272.57            |             |         |         | 6810.50            |             |           |         | 6817.77            |             |           |         |

Note the sign (+/-) of correlation coefficients reflects direction of correlation with transformed EDI domain scores (11 – EDI domain scores).  
 DF=degrees of freedom; EFSL=English/French as a second language AIC=Akaike Information Criterion; BIC=Bayesian Information Criterion



**Table S9: Goodness-of-fit of different distributions and link functions for the social competence domain**

| Domain                                          | Goodness-of-fit statistics | Identity link |          |          | Log link    |          |          |
|-------------------------------------------------|----------------------------|---------------|----------|----------|-------------|----------|----------|
|                                                 |                            | Exponential   | Gamma    | Normal   | Exponential | Gamma    | Normal   |
| Physical health & wellbeing (PHWB)              | AIC                        | 134241.6      | 118384.1 | 121141.6 | 134240.4    | 118399.9 | 121147.4 |
|                                                 | BIC                        | 134684.7      | 118838.4 | 121595.8 | 134683.5    | 118854.2 | 121601.6 |
| Social competence (SC)                          | AIC                        | 150247.6      | 113417.4 | 133234.4 | 150247.5    | 134128.9 | NC       |
|                                                 | BIC                        | 150690.7      | 134571.7 | 133688.7 | 150690.6    | 134583.2 | NC       |
| Emotional maturity (EM)                         | AIC                        | 144859.5      | 118298.1 | 116476.9 | 144859.8    | 118310   | NC       |
|                                                 | BIC                        | 145302.6      | 118752.3 | 116931.2 | 145302.8    | 118764.3 | NC       |
| Language & cognitive development (LCD)          | AIC                        | 144457.3      | 135053.0 | 140742   | 144457.1    | 135069.7 | 140754.4 |
|                                                 | BIC                        | 144900.3      | 135507.3 | 141196.3 | 144900.2    | 135524   | 141208.7 |
| Communication skills & general knowledge (CSGK) | AIC                        | 163276.5      | 151544.1 | 146002.4 | 163274.7    | 151539.4 | NC       |
|                                                 | BIC                        | 163719.5      | 151992.8 | 146456.7 | 163717.8    | 151988.1 | NC       |

AIC=Akaike information criterion; BIC=Bayesian information criterion; NC=not converged

**Table S10: Hierarchical Generalized Linear Model (HGLM) for the Physical Health & Wellbeing (PHWB) Domain of the Early Development Instrument (EDI) excluding outlying and influential cases (n = 687 excluded)**

|                               | <b>B coefficient (SE)</b> | <b>F-statistic</b> | <b>Df</b> | <b>P-value</b> |
|-------------------------------|---------------------------|--------------------|-----------|----------------|
| <b>Intercept</b>              | 4.70 (1.03)               | 20.70              | 1, 1999   | <0.0001        |
| <b>Year (categorical)</b>     |                           | 6.03               | 10, 25432 | <0.0001        |
| <b>Province (categorical)</b> |                           | 19.14              | 11, 25432 | <0.0001        |
| <b>Year*Province</b>          |                           | 4.14               | 53, 25432 | <0.0001        |
| <b>Age</b>                    | 0.02 (0.03)               | 0.63               | 1, 25432  | 0.4265         |
| <b>Sex (M=0; F=1)</b>         | -0.21 (0.03)              | 60.10              | 1, 25432  | <0.0001        |
| <b>EFSL (no=0; yes=1)</b>     | -0.09 (0.04)              | 5.07               | 1, 25432  | 0.0243         |
| <b>SES z-score</b>            | -0.19 (0.02)              | 4.14               | 1, 25432  | <0.0001        |

EFSL=English/French as a second language; Df=degrees of freedom

**Table S11: Hierarchical Generalized Linear Model (HGLM) for the Social Competence (SC) Domain of the Early Development Instrument (EDI) excluding outlying and influential cases (n = 317 excluded)**

|                               | <b>B coefficient (SE)</b> | <b>F-statistic</b> | <b>Df</b> | <b>P-value</b> |
|-------------------------------|---------------------------|--------------------|-----------|----------------|
| <b>Intercept</b>              | 4.54 (1.24)               | 13.47              | 1, 2002   | 0.0003         |
| <b>Year (categorical)</b>     |                           | 5.26               | 10, 25790 | <0.0001        |
| <b>Province (categorical)</b> |                           | 14.83              | 11, 25790 | <0.0001        |
| <b>Year*Province</b>          |                           | 4.43               | 53, 25790 | <0.0001        |
| <b>Age</b>                    | 0.13 (0.04)               | 9.48               | 1, 25790  | 0.0021         |
| <b>Sex (M=0; F=1)</b>         | -0.94 (0.03)              | 736.81             | 1, 25790  | <0.0001        |
| <b>EFSL (no=0; yes=1)</b>     | 0.07 (0.05)               | 1.74               | 1, 25790  | 0.1862         |
| <b>SES z-score</b>            | -0.18 (0.02)              | 86.23              | 1, 25790  | <0.0001        |

EFSL=English/French as a second language; Df=degrees of freedom

**Table S12: Hierarchical Generalized Linear Model (HGLM) for the Emotional Maturity (EM) Domain of the Early Development Instrument (EDI) excluding outlying and influential cases (n = 409 excluded)**

|                               | <b>B coefficient (SE)</b> | <b>F-statistic</b> | <b>Df</b> | <b>P-value</b> |
|-------------------------------|---------------------------|--------------------|-----------|----------------|
| <b>Intercept</b>              | 3.36 (0.91)               | 13.54              | 1, 2001   | 0.0002         |
| <b>Year (categorical)</b>     |                           | 3.84               | 10, 25566 | <0.0001        |
| <b>Province (categorical)</b> |                           | 12.32              | 11, 25566 | <0.0001        |
| <b>Year*Province</b>          |                           | 3.04               | 53, 25566 | <0.0001        |
| <b>Age</b>                    | 0.10 (0.03)               | 10.68              | 1, 25566  | 0.0011         |
| <b>Sex (M=0; F=1)</b>         | -0.91 (0.03)              | 1307.36            | 1, 25566  | <0.0001        |
| <b>EFSL (no=0; yes=1)</b>     | -0.13 (0.04)              | 11.97              | 1, 25566  | 0.0005         |
| <b>SES z-score</b>            | -0.14 (0.01)              | 88.74              | 1, 25566  | <0.0001        |

EFSL=English/French as a second language; Df=degrees of freedom

**Table S13: Hierarchical Generalized Linear Model (HGLM) for the Language & Cognitive Development (LCD) Domain of the Early Development Instrument (EDI) excluding outlying and influential cases (n = 619 excluded)**

|                               | <b>B coefficient (SE)</b> | <b>F-statistic</b> | <b>Df</b> | <b>P-value</b> |
|-------------------------------|---------------------------|--------------------|-----------|----------------|
| <b>Intercept</b>              | 3.43 (1.27)               | 12.11              | 1, 2002   | 0.0005         |
| <b>Year (categorical)</b>     |                           | 5.87               | 10, 25403 | <0.0001        |
| <b>Province (categorical)</b> |                           | 13.29              | 11, 25403 | <0.0001        |
| <b>Year*Province</b>          |                           | 4.16               | 53, 25403 | <0.0001        |
| <b>Age</b>                    | -0.20 (0.04)              | 22.42              | 1, 25403  | <0.0001        |
| <b>Sex (M=0; F=1)</b>         | -0.23 (0.04)              | 36.93              | 1, 25403  | <0.0001        |
| <b>EFSL (no=0; yes=1)</b>     | 0.50 (0.06)               | 67.66              | 1, 25403  | <0.0001        |
| <b>SES z-score</b>            | -0.39 (0.02)              | 278.45             | 1, 25403  | <0.0001        |

EFSL=English/French as a second language; Df=degrees of freedom

**Table S14: Hierarchical Generalized Linear Model (HGLM) for the Communication Skills & General Knowledge (CSGK) Domain of the Early Development Instrument (EDI) excluding outlying and influential cases (n = 2 excluded)**

|                               | <b>B coefficient (SE)</b> | <b>F-statistic</b> | <b>Df</b> | <b>P-value</b> |
|-------------------------------|---------------------------|--------------------|-----------|----------------|
| <b>Intercept</b>              | 6.02 (1.78)               | 11.49              | 1, 2002   | 0.0007         |
| <b>Year (categorical)</b>     |                           | 1.81               | 10, 26139 | 0.0527         |
| <b>Province (categorical)</b> |                           | 7.35               | 11, 26139 | <0.0001        |
| <b>Year*Province</b>          |                           | 1.63               | 53, 26139 | 0.0027         |
| <b>Age</b>                    | 0.13 (0.06)               | 5.09               | 1, 26139  | 0.0241         |
| <b>Sex (M=0; F=1)</b>         | -0.43 (0.05)              | 71.08              | 1, 26139  | <0.0001        |
| <b>EFSL (no=0; yes=1)</b>     | 1.11 (0.08)               | 173.83             | 1, 26139  | <0.0001        |
| <b>SES z-score</b>            | -0.19 (0.03)              | 54.80              | 1, 26139  | <0.0001        |

EFSL=English/French as a second language; Df=degrees of freedom
